# Supplementary material for: Design and construction of a hydrophilic coating on macroporous adsorbent resins for enrichment of glycopeptides
Source: Royal Society of Chemistry journal article supplement (doi:10.1039/d1ay01276b), 2021-01-01
Supplement: d1ay01276b1.pdf [file d1ay01276b1.pdf]

# **Design and construction of hydrophilic coating onto macroporous adsorbent resins for enrichment of glycopeptides**

Zheng Gao<sup>1,2</sup>, Ruizhi Tang<sup>2</sup>, Shujuan Ma<sup>2</sup>, Shicong Jia<sup>1,2</sup>, Shuai Zhang<sup>1,2</sup>, Bolin Gong<sup>1\*</sup>, Junjie Ou<sup>1,2,3\*</sup>

<sup>1</sup>School of Chemistry and Chemical Engineering, Key Laboratory for Chemical Engineering and Technology, State Ethnic Affairs Commission, North Minzu University, Yinchuan 750021, China

<sup>2</sup>CAS Key Laboratory of Separation Science for Analytical Chemistry, Dalian Institute of Chemical Physics, Chinese Academy of Sciences, Dalian 116023, China

<sup>3</sup>University of Chinese Academy of Sciences, Beijing 100049, China

\* To whom correspondence should be addressed:

**Prof. Bolin Gong**

Tel: +86-951-2067917

Fax: +86-951-2067917

Email address: gongbolin@163.com (B. Gong)

**Prof. Junjie Ou**

Tel: +86-411-84379576

Fax: +86-411-84379620

Email address: junjieou@dicp.ac.cn (J. Ou)

---

## Table of contents

---

### Experiment details

|                                                                                                                                                                                                                                                            |      |
|------------------------------------------------------------------------------------------------------------------------------------------------------------------------------------------------------------------------------------------------------------|------|
| Digestion of proteins                                                                                                                                                                                                                                      | S-3  |
| cLC-MS/MS analysis                                                                                                                                                                                                                                         | S-4  |
| <b>Fig. S1.</b> Schematic diagram of HILIC enrichment of glycopeptides protocol                                                                                                                                                                            | S-5  |
| <b>Fig. S2.</b> MALDI-TOF MS analysis of enriched glycopeptides from 10 µg of IgG digest by poly(MT)@MAR with different loading solution                                                                                                                   | S-6  |
| <b>Fig. S3.</b> MALDI-TOF MS analysis of enriched glycopeptides from 10 µg of IgG digest by two kinds of MARs                                                                                                                                              | S-7  |
| <b>Fig. S4.</b> MALDI-TOF MS analysis of enriched glycopeptides from the mixed digests of BSA and IgG by three kinds of MARs                                                                                                                               | S-8  |
| <b>Fig. S5.</b> MALDI-TOF MS analysis of enriched glycopeptides from the mixed digests of BSA and IgG by poly(TC)@MAR                                                                                                                                      | S-9  |
| <b>Fig. S6.</b> MALDI-TOF MS analysis of enriched glycopeptides from 10 fmol of IgG digest by two kinds of MARs and signal intensities of four selected <i>N</i> -glycopeptides enriched from different loading amounts of IgG digest by two kinds of MARs | S-10 |
| <b>Fig. S7.</b> Identification results of human serum digest after enrichment with poly(TC)@MAR by cLC-MS/MS.                                                                                                                                              | S-11 |
| <b>Fig. S8.</b> Identification results of human serum digest after enrichment with poly(IM)@MAR by cLC-MS/MS                                                                                                                                               | S-12 |
| <b>Table S1.</b> <i>N</i> -glycopeptides enriched by poly(MT)MAR from 10 µg of IgG digest                                                                                                                                                                  | S-13 |
| <b>Table S2.</b> <i>N</i> -glycopeptides enriched by poly(TC)MAR from 10 µg of IgG digest                                                                                                                                                                  | S-14 |
| <b>Table S3.</b> <i>N</i> -glycopeptides enriched by poly(IM)MAR from 10 µg of IgG digest                                                                                                                                                                  | S-15 |
| <b>Table S4.</b> <i>N</i> -glycopeptides enriched by poly(MT)@MAR from 2 µL of human serum digest                                                                                                                                                          | S-16 |
| <b>Table S5.</b> The identified amounts of <i>N</i> -glycopeptides, <i>N</i> -glycosylation sites and <i>N</i> -glycoproteins from 2 µL of human serum digest by three kinds of MARs                                                                       | S-31 |
| <b>Table S6.</b> <i>N</i> -glycopeptides enriched by poly(TC)@MAR from 2 µL of human serum digest                                                                                                                                                          | S-32 |
| <b>Table S7.</b> <i>N</i> -glycopeptides enriched by poly(IM)@MAR from 2 µL of human serum digest                                                                                                                                                          | S-51 |

---

## **Experiment details**

### **Digestion of proteins**

Human serum was digested according to the protocol. Firstly, two milligrams of protein were dissolved in 1.0 mL of aqueous solution containing 8 M urea and 50 mM  $\text{NH}_4\text{HCO}_3$  (8.0, pH). The solution was treated with 20 mM DTT at 37 °C for 2 h and then 40 mM IAA at room temperature in darkness for 40 min. Next, the solution was treated with trypsin overnight at 37 °C with an enzyme/protein ratio of 1/25 (w/w) after it was diluted 8 folds by 50 mM Tris-HCl (7.8, pH). The digest was desalted using Oasis HLB SPE column (Waters, MA). Finally, the samples were all lyophilized and stored at -20°C for further analysis.

### **cLC-MS/MS analysis**

The sample was dissolved with water containing 0.1% FA before the cLC-MS/MS analysis. A trap column (4.0 cm × 200 μm i.d.) and a capillary analysis column (25.0 cm × 150 μm i.d.) were prepared in advance, packed with 5 μm and 3 μm C18-silica AQ beads, separately. The sample was firstly automatically injected into the trap column with mobile phase A (H<sub>2</sub>O/0.1% FA) for 10 min and then separated on the analysis column. The elute gradient was set as follows: 0–5% mobile phase B (ACN/0.1% FA) for 2 min; 5–35% B for 93 min; 35–80% B for 18 min; 80% B for 10 min; and finally equilibrating with 100% mobile phase A for 15 min. The flow rate was 600 nL/min. MS spectra were collected in the data-dependent mode. The spray voltage was set at 2.0 kV in the positive ion mode. The scan ranged from *m/z* 400 to 2000. The 20 most intense multiply charged ions were fragmented. System control and data collection were done by an Xcalibur software (Version 2.1, Thermo Fisher Scientific, USA).

The obtained data were searched on Mascot Daemon (version 2.5.1) against a UniProt reviewed human database. Mass tolerance of parent ions was set at 20 ppm and mass deviation of fragment ions at 0.8 Da. The false-discovery rates (FDRs) were controlled lower than 1%. Up to two missed cleavage sites were allowed. Deamidated (NQ) was selected as variable modification. Identification of *N*-glycopeptides was accomplished using the Armone 2.1 software.

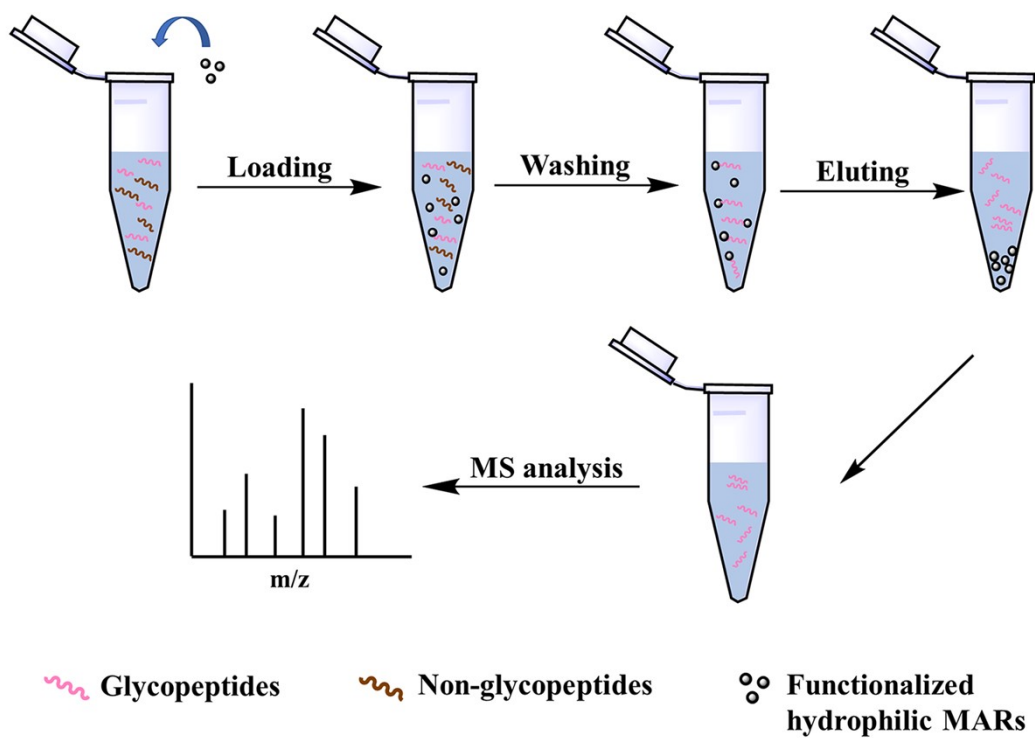

Fig. S1. Schematic diagram of HILIC enrichment of glycopeptides protocol

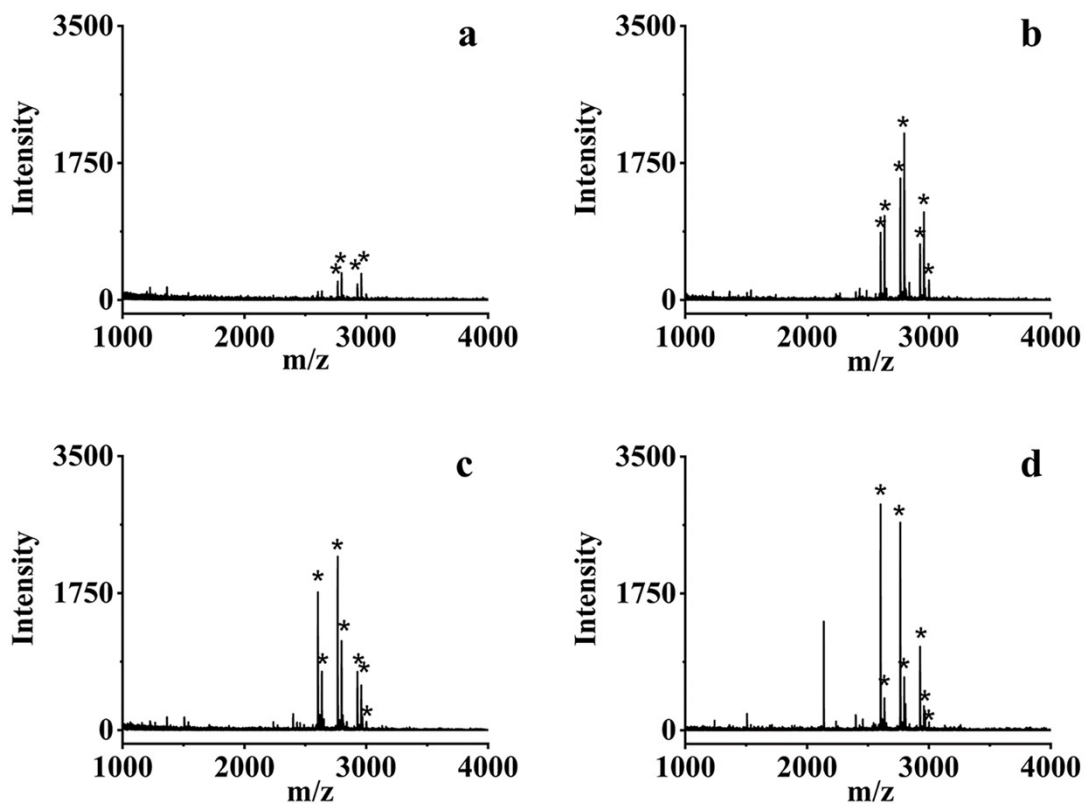

Fig. S2. MALDI-TOF MS analysis of enriched glycopeptides from 10  $\mu\text{g}$  of IgG digest by poly(MT)@MAR with different loading solution. (a) ACN/H<sub>2</sub>O/TFA (80/19/1, v/v/v), (b) ACN/H<sub>2</sub>O/TFA (83/16/1, v/v/v), (c) ACN/H<sub>2</sub>O/TFA (85/14/1, v/v/v) and (d) ACN/H<sub>2</sub>O/TFA (90/9/1, v/v/v). The bullet (\*) indicates glycopeptides

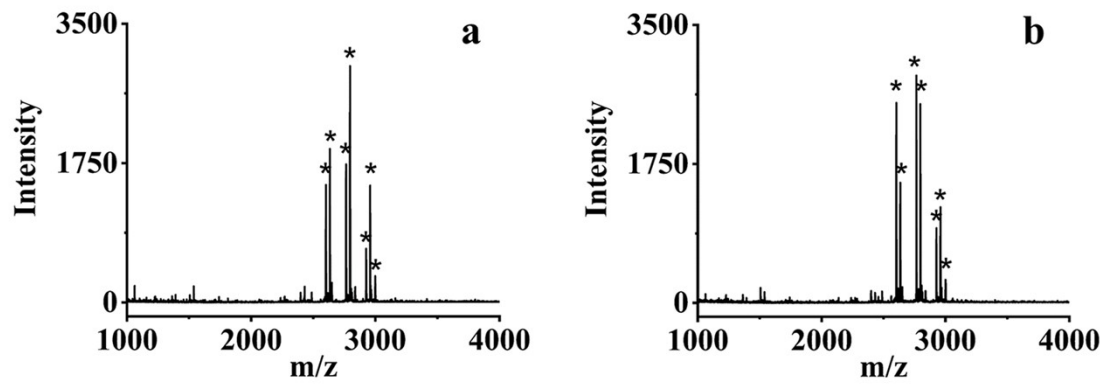

Fig. S3. MALDI-TOF MS analysis of enriched glycopeptides from 10  $\mu$ g of IgG digest by (a) poly(TC)@MAR and poly(IM)@MAR

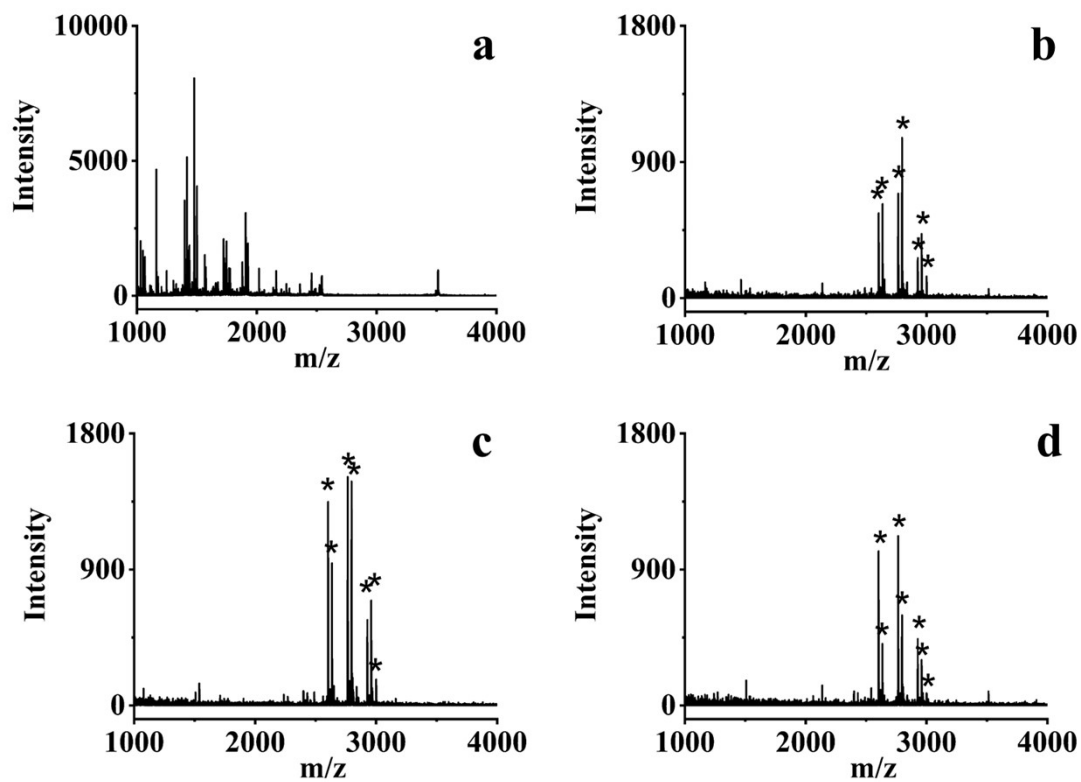

Fig. S4. MALDI-TOF MS analysis of enriched glycopeptides from the mixed digests of BSA and IgG by (a) direct analysis before enrichment (b) poly(MT)@MAR, (c) poly(TC)@MAR, (d) poly(IM)@MAR. The mass ratios of BSA digest to IgG digest were 5:1



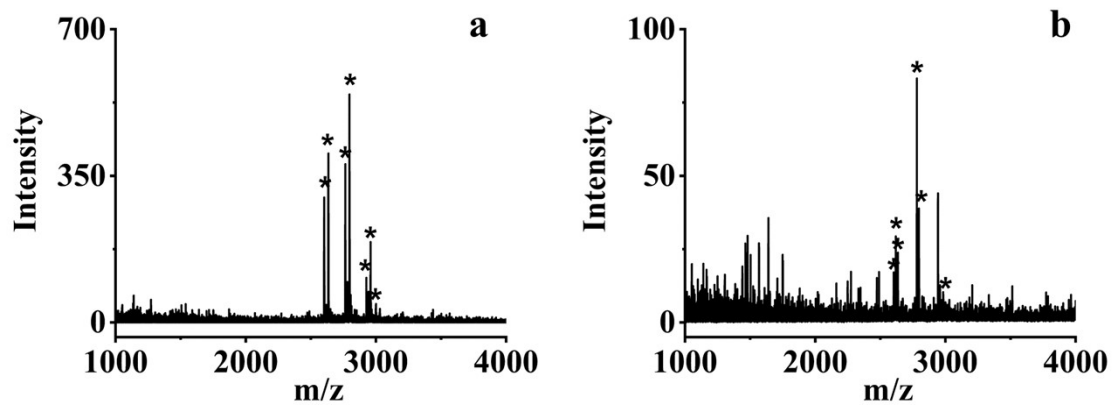

Fig. S5. MALDI-TOF MS analysis of enriched glycopeptides from the mixed digests of BSA and IgG by poly(TC)@MAR. The mass ratios of BSA digest to IgG digest were (a)100:1 and (b)1000:1 (The eluent was concentrated 20 times)

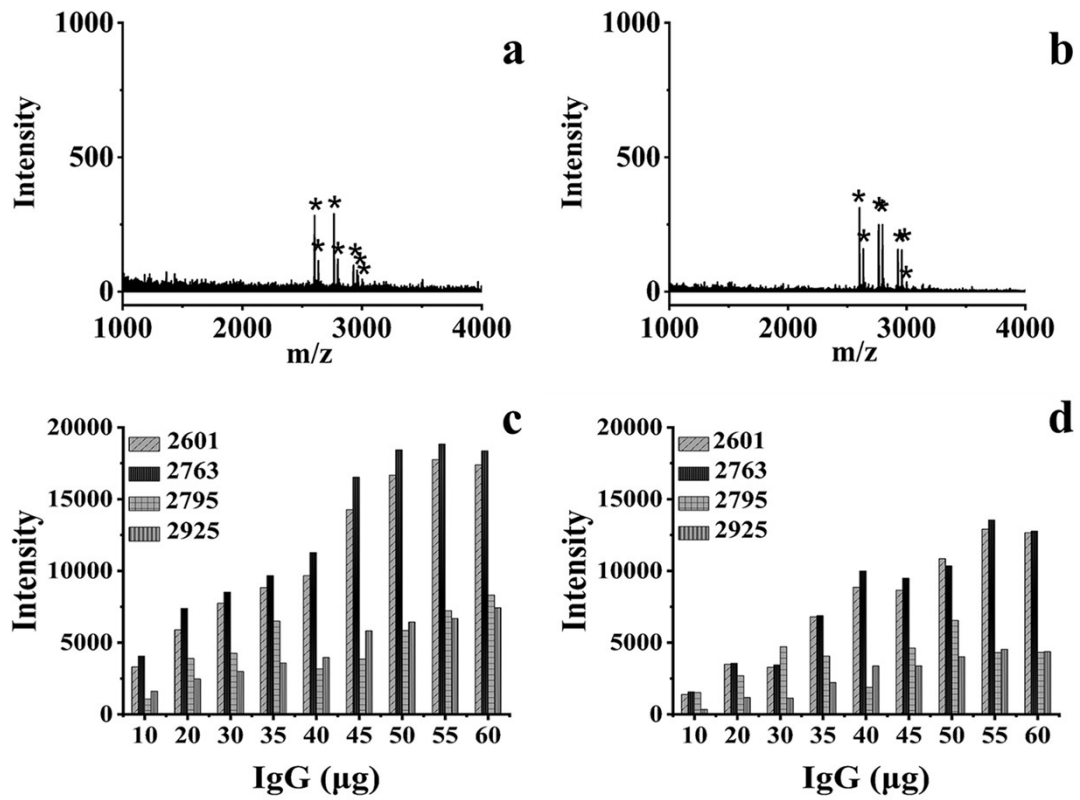

Fig. S6. MALDI-TOF MS analysis of enriched glycopeptides from 10 fmol of IgG digest by (a) poly(TC)@MAR and (b) poly(IM)@MAR, signal intensities of four selected *N*-glycopeptides enriched from different loading amounts of IgG digest by (c) poly(TC)@MAR, (d) poly(IM)@MAR, respectively

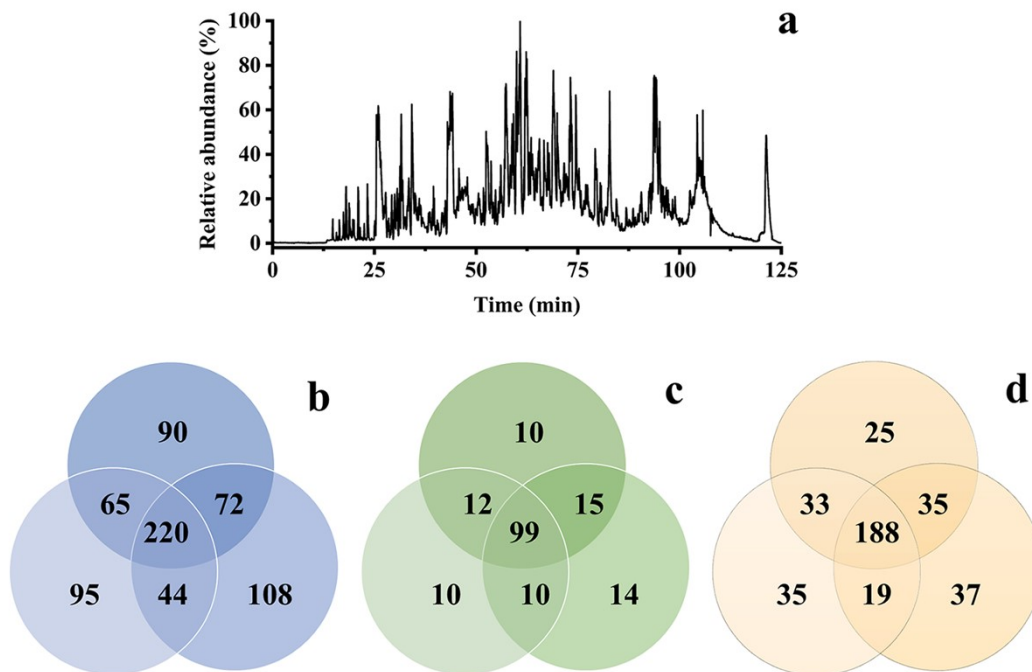

Fig. S7. Identification results of human serum digest after enrichment with poly(TC)@MAR by cLC-MS/MS. (a) Separation chromatogram, Venn diagrams of identified unique (b) *N*-glycopeptides, (c) *N*-glycoproteins and (d) *N*-glycosylation sites for three replicated experiments

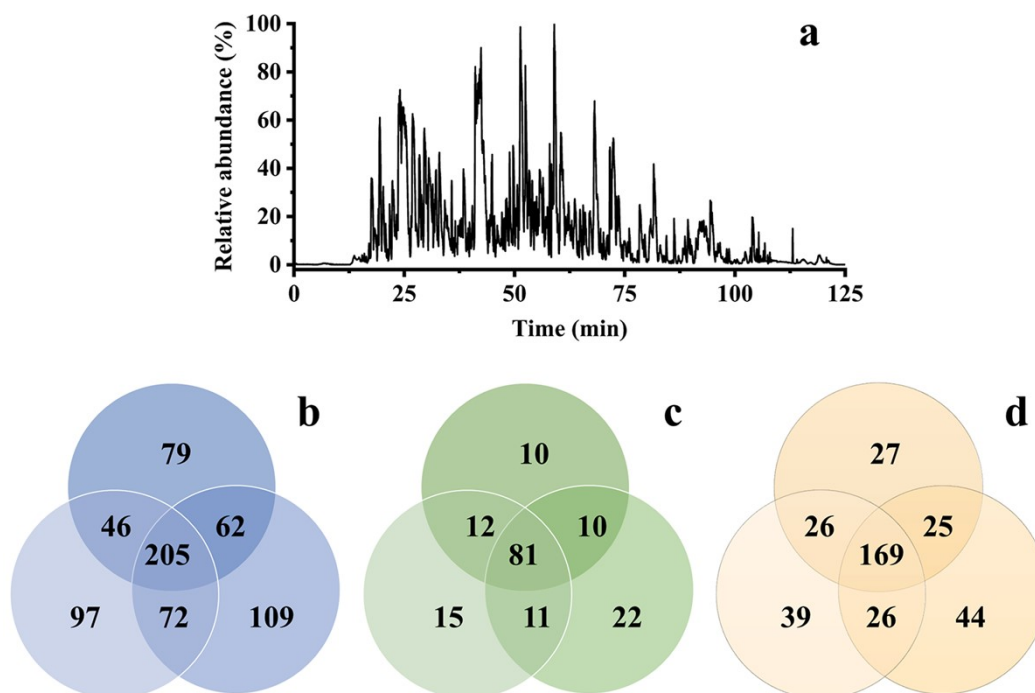

Fig. S8. Identification results of human serum digest after enrichment with poly(IM)@MAR by cLC-MS/MS. (a) Separation chromatogram, Venn diagrams of identified unique (b) *N*-glycopeptides, (c) *N*-glycoproteins and (d) *N*-glycosylation sites.

Table S1. *N*-glycopeptides enriched by poly(MT)MAR from 10 µg of IgG digest

| Peak No. | m/z      | Glycan composition    | Amino acid sequence |
|----------|----------|-----------------------|---------------------|
| I1       | 2238.077 | [Hex]3[HexNAc]2[Fuc]1 | EEQFN#STFR          |
| I2       | 2269.125 | [Hex]3[HexNAc]2[Fuc]1 | EEQYN#STYR          |
| I3       | 2399.162 | [Hex]3[HexNAc]3[Fuc]1 | EEQFN#STFR          |
| I4       | 2431.260 | [Hex]3[HexNAc]3[Fuc]1 | EEQYN#STYR          |
| I5       | 2488.178 | [Hex]3[HexNAc]4       | EEQYN#STYR          |
| I6       | 2561.221 | [Hex]4[HexNAc]3[Fuc]1 | EEQFN#STFR          |
| I7       | 2593.189 | [Hex]4[HexNAc]3[Fuc]1 | EEQYN#STFR          |
| I8       | 2602.288 | [Hex]3[HexNAc]4[Fuc]1 | EEQFN#STFR          |
| I9       | 2618.286 | [Hex]4[HexNAc]4       | EEQFN#STFR          |
| I10      | 2634.259 | [Hex]3[HexNAc]4[Fuc]1 | EEQYN#STYR          |
| I11      | 2650.303 | [Hex]4[HexNAc]4       | EEQYN#STYR          |
| I12      | 2764.348 | [Hex]4[HexNAc]4[Fuc]1 | EEQFN#STFR          |
| I13      | 2781.326 | [Hex]5[HexNAc]4       | EEQFN#STFR          |
| I14      | 2796.347 | [Hex]4[HexNAc]4[Fuc]1 | EEQYN#STYR          |

|     |          |                               |            |
|-----|----------|-------------------------------|------------|
| I15 | 2805.336 | [Hex]3[HexNAc]5[Fuc]1         | EEQFN#STFR |
| I16 | 2812.298 | [Hex]5[HexNAc]4               | EEQYN#STYR |
| I17 | 2837.348 | [Hex]3[HexNAc]5[Fuc]1         | EEQYN#STYR |
| I18 | 2926.417 | [Hex]5[HexNAc]4[Fuc]1         | EEQFN#STFR |
| I19 | 2958.394 | [Hex]5[HexNAc]4[Fuc]1         | EEQYN#STYR |
| I20 | 2967.409 | [Hex]4[HexNAc]5[Fuc]1         | EEQFN#STFR |
| I21 | 2999.410 | [Hex]4[HexNAc]5[Fuc]1         | EEQYN#STYR |
| I22 | 3161.480 | [Hex]5[HexNAc]5[Fuc]1         | EEQYN#STYR |
| I23 | 3250.580 | [Hex]5[HexNAc]4[Fuc]1[NeuAc]1 | EEQYN#STYR |

Table S2. *N*-glycopeptides enriched by poly(TC)MAR from 10 µg of IgG digest

| Peak No. | m/z      | Glycan composition    | Amino acid sequence |
|----------|----------|-----------------------|---------------------|
| I1       | 2235.922 | [Hex]3[HexNAc]2[Fuc]1 | EEQFN#STFR          |
| I2       | 2267.904 | [Hex]3[HexNAc]2[Fuc]1 | EEQYN#STYR          |
| I3       | 2397.874 | [Hex]3[HexNAc]3[Fuc]1 | EEQFN#STFR          |
| I4       | 2429.896 | [Hex]3[HexNAc]3[Fuc]1 | EEQYN#STYR          |
| I5       | 2486.874 | [Hex]3[HexNAc]4       | EEQYN#STYR          |
| I6       | 2559.946 | [Hex]4[HexNAc]3[Fuc]1 | EEQFN#STFR          |
| I7       | 2591.901 | [Hex]4[HexNAc]3[Fuc]1 | EEQYN#STFR          |
| I8       | 2600.953 | [Hex]3[HexNAc]4[Fuc]1 | EEQFN#STFR          |
| I9       | 2617.923 | [Hex]4[HexNAc]4       | EEQFN#STFR          |
| I10      | 2632.924 | [Hex]3[HexNAc]4[Fuc]1 | EEQYN#STYR          |
| I11      | 2648.903 | [Hex]4[HexNAc]4       | EEQYN#STYR          |
| I12      | 2762.936 | [Hex]4[HexNAc]4[Fuc]1 | EEQFN#STFR          |
| I13      | 2778.009 | [Hex]5[HexNAc]4       | EEQFN#STFR          |
| I14      | 2794.926 | [Hex]4[HexNAc]4[Fuc]1 | EEQYN#STYR          |

|     |          |                       |            |
|-----|----------|-----------------------|------------|
| I15 | 2804.920 | [Hex]3[HexNAc]5[Fuc]1 | EEQFN#STFR |
| I16 | 2810.875 | [Hex]5[HexNAc]4       | EEQYN#STYR |
| I17 | 2835.926 | [Hex]3[HexNAc]5[Fuc]1 | EEQYN#STYR |
| I18 | 2924.932 | [Hex]5[HexNAc]4[Fuc]1 | EEQFN#STFR |
| I19 | 2956.907 | [Hex]5[HexNAc]4[Fuc]1 | EEQYN#STYR |
| I20 | 2965.922 | [Hex]4[HexNAc]5[Fuc]1 | EEQFN#STFR |
| I21 | 2984.851 | [Hex]5[HexNAc]5       | EEQFN#STFR |
| I22 | 2997.883 | [Hex]4[HexNAc]5[Fuc]1 | EEQYN#STYR |
| I23 | 3127.901 | [Hex]5[HexNAc]5[Fuc]1 | EEQFN#STFR |
| I24 | 3159.922 | [Hex]5[HexNAc]5[Fuc]1 | EEQYN#STYR |

Table S3. *N*-glycopeptides enriched by poly(IM)MAR from 10 µg of IgG digest

| Peak No. | m/z      | Glycan composition    | Amino acid sequence |
|----------|----------|-----------------------|---------------------|
| I1       | 2237.094 | [Hex]3[HexNAc]2[Fuc]1 | EEQFN#STFR          |
| I2       | 2269.019 | [Hex]3[HexNAc]2[Fuc]1 | EEQYN#STYR          |
| I3       | 2399.105 | [Hex]3[HexNAc]3[Fuc]1 | EEQFN#STFR          |
| I4       | 2431.087 | [Hex]3[HexNAc]3[Fuc]1 | EEQYN#STYR          |
| I5       | 2456.123 | [Hex]3[HexNAc]4       | EEQFN#STFR          |
| I6       | 2488.121 | [Hex]3[HexNAc]4       | EEQYN#STYR          |
| I7       | 2602.240 | [Hex]3[HexNAc]4[Fuc]1 | EEQFN#STFR          |
| I8       | 2618.244 | [Hex]4[HexNAc]4       | EEQFN#STFR          |
| I9       | 2634.222 | [Hex]3[HexNAc]4[Fuc]1 | EEQYN#STYR          |
| I10      | 2650.203 | [Hex]4[HexNAc]4       | EEQYN#STYR          |
| I11      | 2764.315 | [Hex]4[HexNAc]4[Fuc]1 | EEQFN#STFR          |
| I12      | 2778.289 | [Hex]5[HexNAc]4       | EEQFN#STFR          |
| I13      | 2796.292 | [Hex]4[HexNAc]4[Fuc]1 | EEQYN#STYR          |

|     |          |                       |            |
|-----|----------|-----------------------|------------|
| I14 | 2805.330 | [Hex]3[HexNAc]5[Fuc]1 | EEQFN#STFR |
| I15 | 2812.312 | [Hex]5[HexNAc]4       | EEQYN#STYR |
| I16 | 2837.335 | [Hex]3[HexNAc]5[Fuc]1 | EEQYN#STYR |
| I17 | 2926.358 | [Hex]5[HexNAc]4[Fuc]1 | EEQFN#STFR |
| I18 | 2958.360 | [Hex]5[HexNAc]4[Fuc]1 | EEQYN#STYR |
| I19 | 2967.425 | [Hex]4[HexNAc]5[Fuc]1 | EEQFN#STFR |
| I20 | 2999.379 | [Hex]4[HexNAc]5[Fuc]1 | EEQYN#STYR |
| I21 | 3161.492 | [Hex]5[HexNAc]5[Fuc]1 | EEQYN#STYR |

Table S4. *N*-glycopeptides enriched by poly(MT)@MAR from 2  $\mu$ L of human serum digest

| Site  | Protein | Modified Sequence                      |
|-------|---------|----------------------------------------|
| N271  | P01009  | K.YLGN*ATAIFFLPDEGK.L                  |
| N271  | P01009  | K.YLGN*ATAIFFLPDEGKLQHLENELTHDIITK.F   |
| N271  | P01009  | K.YLGN*ATAIFFLPDEGKLQHLEN*ELTHDIITK.F  |
| N107  | P01009  | K.ADTHDEILEGLNFN*LTEIPEAQIHEGFQELLR.T  |
| N107  | P01009  | K.ADTHDEILEGLNFN*LTEIPEAQ*IHEGFQELLR.T |
| N107  | P01009  | K.ADTHDEILEGLN*FN*LTEIPEAQIHEGFQELLR.T |
| N2982 | P04114  | R.VNQNLVYESGSLN*FSK.L                  |
| N3411 | P04114  | K.FVEGSHN*STVSLTTK.N                   |
| N983  | P04114  | K.QVFPGLNYCTSGAYSN*ASSTDSASYPLTGDTR.L  |
| N3895 | P04114  | R.FEVDSPVYN*ATWSASLK.N                 |
| N2239 | P04114  | K.TIHDLHLFIENIDFN*K.S                  |
| N3336 | P04114  | K.ELCTISHIFIPAM#GN*ITYDFSFK.S          |

| Site  | Protein | Modified Sequence                            |
|-------|---------|----------------------------------------------|
| N2779 | P04114  | K.IQSPLFTLDAN*ADIGN*GTTSAN*EAGIAASITAK.G     |
| N2779 | P04114  | K.IQ*SPLFTLDANADIGN*GTTSANEAGIAASITAK.G      |
| N1523 | P04114  | R.FN*SSYLQGTN*QITGR.Y                        |
| N1523 | P04114  | R.FN*SSYLQGTNQITGR.Y                         |
| N3465 | P04114  | K.YDFN*SSM#LYSTAK.G                          |
| N869  | P01023  | K.SLGN*VN*FTVSAEAELESQ*ELCGTEVPSVPEHGRK.D    |
| N869  | P01023  | K.SLGNVN*FTVSAEAELESQELCGTEVPSVPEHGRK        |
| N869  | P01023  | K.SLGN*VN*FTVSAEAELESQ*ELCGTEVPSVPEHGR.K     |
| N869  | P01023  | K.SLGNVN*FTVSAEAELESQ*ELCGTEVPSVPEHGR.K      |
| N410  | P01023  | R.GNEANYYSNATTDEHGLVQFSIN*TTN*VMGTSLTVR.V    |
| N396  | P01023  | R.GNEANYYSN*ATTDEHGLVQFSINTTN*VMGTSLTVR.V    |
| N396  | P01023  | R.GNEANYYSN*ATTDEHGLVQ*FSIN*TTNVMGTSLTVR.V   |
| N410  | P01023  | R.GNEANYYSN*ATTDEHGLVQ*FSIN*TTNVMGTSLTVR.V   |
| N410  | P01023  | R.GNEANYYSNATTDEHGLVQ*FSIN*TTNVMGTSLTVR.V    |
| N396  | P01023  | R.GNEAN*YYSN*ATTDEHGLVQ*FSIN*TTN*VMGTSLTVR.V |
| N410  | P01023  | R.GNEAN*YYSN*ATTDEHGLVQ*FSIN*TTN*VMGTSLTVR.V |
| N396  | P01023  | R.GNEAN*YYSN*ATTDEHGLVQFSIN*TTN*VMGTSLTVR.V  |
| N410  | P01023  | R.GNEAN*YYSN*ATTDEHGLVQFSIN*TTN*VMGTSLTVR.V  |
| N396  | P01023  | R.GN*EANYYSN*ATTDEHGLVQ*FSIN*TTNVMGTSLTVR.V  |
| N410  | P01023  | R.GN*EANYYSN*ATTDEHGLVQ*FSIN*TTNVMGTSLTVR.V  |
| N396  | P01023  | R.GNEANYYSN*ATTDEHGLVQFSIN*TTNVMGTSLTVR.V    |
| N410  | P01023  | R.GNEANYYSN*ATTDEHGLVQFSIN*TTNVMGTSLTVR.V    |
| N410  | P01023  | R.GNEAN*YYSNATTDEHGLVQ*FSIN*TTN*VMGTSLTVR.V  |
| N396  | P01023  | R.GNEAN*YYSN*ATTDEHGLVQ*FSIN*TTNVMGTSLTVR.V  |
| N410  | P01023  | R.GNEAN*YYSN*ATTDEHGLVQ*FSIN*TTNVMGTSLTVR.V  |
| N55   | P01023  | K.GCVLLSYLN*ETVTVSASLESVR.G                  |
| N396  | P01023  | R.GNEAN*YYSN*ATTDEHGLVQ*FSINTTN*VMGTSLTVR.V  |
| N396  | P01023  | R.GN*EAN*YYSN*ATTDEHGLVQFSIN*TTN*VMGTSLTVR.V |
| N410  | P01023  | R.GN*EAN*YYSN*ATTDEHGLVQFSIN*TTN*VMGTSLTVR.V |
| N85   | P01024  | K.TVLTPATNHMGN*VTFTIPANR.E                   |
| N85   | P01024  | K.TVLTPATN*HMGN*VTFTIPANR.E                  |
| N85   | P01024  | K.TVLTPATNHM#GN*VTFTIPANR.E                  |
| N128  | P01008  | K.LGACN*DTLQQLM#EVFK.F                       |
| N128  | P01008  | K.LGACN*DTLQQLM#EVFKFDTISEK.T                |
| N128  | P01008  | K.LGACN*DTLQQ*LM#EVFKFDTISEK.T               |
| N128  | P01008  | K.LGACN*DTLQ*QLM#EVFKFDTISEK.T               |
| N187  | P01008  | R.LFGDKSLTFN*ETYQDISELVYGAK.L                |
| N128  | P01008  | K.LGACN*DTLQQLMEVFK.F                        |
| N128  | P01008  | K.LGACN*DTLQQLMEVFKFDTISEK.T                 |
| N187  | P01008  | K.SLTFN*ETYQDISELVYGAK.L                     |
| N128  | P01008  | K.LGACN*DTLQQ*LMEVFK.F                       |



| Site  | Protein | Modified Sequence                       |
|-------|---------|-----------------------------------------|
| N128  | P01008  | K.LGACN*DTLQQ*LMEVFKFDTISEK.T           |
| N128  | P01008  | K.LGACN*DTLQ*QLMEVFK.F                  |
| N224  | P01008  | K.WVSN*KTEGR.I                          |
| N180  | P01857  | R.EEQYN*STYR.V                          |
| N180  | P01857  | K.TKPREEQYN*STYR.V                      |
| N180  | P01857  | R.EEQ*YN*STYR.V                         |
| N209  | P01871  | R.GLTFQQN*ASSMCVDPQDTAIR.V              |
| N272  | P01871  | K.THTN*ISESHPN*ATFSAVGEASICEDDWN*SGER.F |
| N279  | P01871  | K.THTN*ISESHPN*ATFSAVGEASICEDDWN*SGER.F |
| N209  | P01871  | R.GLTFQQN*ASSMCVDPQ*DTAIR.V             |
| N209  | P01871  | R.GLTFQQ*N*ASSMCVDPQDTAIR.V             |
| N272  | P01871  | K.THTN*ISESHPN*ATFSAVGEASICEDDWN*SGER.F |
| N279  | P01871  | K.THTN*ISESHPN*ATFSAVGEASICEDDWN*SGER.F |
| N440  | P01871  | K.STGKPTLYN*VSLVM#SDTAGTCY.-            |
| N272  | P01871  | K.THTN*ISESHPN*ATFSAVGEASICEDDWN*SGER.F |
| N209  | P01871  | R.GLTFQQ*N*ASSMCVDPQ*DTAIR.V            |
| N440  | P01871  | K.STGKPTLYN*VSLVMSDTAGTCY.-             |
| N46   | P01871  | K.YKN*NSDISSTR.G                        |
| N46   | P01871  | K.YKN*N*SDISSTR.G                       |
| N209  | P01871  | R.GLTFQQN*ASSM#CVPDQDTAIR.V             |
| N209  | P01871  | R.GLTFQQ*N*ASSM#CVPDQDTAIR.V            |
| N209  | P01871  | R.GLTFQ*QN*ASSM#CVPDQ*DTAIR.V           |
| N118  | P02766  | K.ALGISPFHEHAEVVFTAN*DSGPR.R            |
| N241  | P00738  | K.VVLHPN*YSQVDIGLIK.L                   |
| N241  | P00738  | K.VVLHPN*YSQ*VDIGLIK.L                  |
| N184  | P00738  | K.M#VSHHN*LTTGATLINEQWLLTTAK.N          |
| N184  | P00738  | K.MVSHHN*LTTGATLINEQ*WLLTTAK.N          |
| N184  | P00738  | K.M#VSHHN*LTTGATLIN*EQ*WLLTTAK.N        |
| N184  | P00738  | K.MVSHHN*LTTGATLINEQWLLTTAK.N           |
| N184  | P00738  | K.MVSHHN*LTTGATLIN*EQWLLTTAK.N          |
| N184  | P00738  | K.MVSHHN*LTTGATLIN*EQ*WLLTTAK.N         |
| N211  | P00738  | K.NLFLNHSEN*ATAK.D                      |
| N207  | P00738  | K.NLFLN*HSENATAK.D                      |
| N207  | P00738  | K.NLFLN*HSEN*ATAK.D                     |
| N211  | P00738  | K.NLFLN*HSEN*ATAK.D                     |
| N226  | P0C0L4  | R.FSDGLESN*SSTQFEVK.K                   |
| N1391 | P0C0L4  | K.N*TTCQDLQIEVTVK.G                     |
| N1391 | P0C0L4  | K.N*TTCQ*DLQIEVTVK.G                    |
| N1328 | P0C0L4  | R.GLN*VTLSSSTGR.N                       |
| N1328 | P0C0L4  | R.GLN*VTLSSSTGRN*GFK.S                  |
| N127  | P01011  | R.TLN*Q*SSDELQLSM#GN*AMFVK.E            |

| Site  | Protein | Modified Sequence                    |
|-------|---------|--------------------------------------|
| N271  | P01011  | K.YTGN*ASALFILPDQDK.M                |
| N106  | P01011  | K.FN*LTETSEAEIHQSFQHLLR.T            |
| N271  | P01011  | K.YTGN*ASALFILPDQDKMEEVEAMLLPETLKR.W |
| N127  | P01011  | R.TLN*QSSDELQLSMGNAMFVK.E            |
| N127  | P01011  | R.TLN*Q*SSDELQLSMGNAMFVK.E           |
| N340  | P01876  | R.LAGKPTHVN*VSVVM#AEVDGTCY.-         |
| N340  | P01876  | R.LAGKPTHVN*VSVVMAEVDGTCY.-          |
| N144  | P01876  | R.LSLHRPALEDLLLGSEAN*LTCTLTGLR.D     |
| N430  | P02751  | R.GGNSNGALCHFPFLYNN*HN*YTDCTSEGR.R   |
| N430  | P02751  | R.GGN*SNGALCHFPFLYNNHN*YTDCTSEGR.R   |
| N1007 | P02751  | K.LDAPTNLQFVN*ETDSTVLVR.W            |
| N1007 | P02751  | K.LDAPTN*LQFVN*ETDSTVLVR.W           |
| N542  | P02751  | R.HEEGHM#LN*CTCFGQGR.G               |
| N542  | P02751  | K.RHEEGHMLN*CTCFGQGR.G               |
| N542  | P02751  | R.HEEGHMLN*CTCFGQGR.G                |
| N432  | P02787  | K.CGLVPVLAENYN*K.S                   |
| N453  | P02790  | K.ALPQPQN*VTSLLGCTH.-                |
| N453  | P02790  | K.ALPQPQ*N*VTSLLGCTH.-               |
| N240  | P02790  | R.GHGHNR*GTGHGN*STHHGPEYM#R.C        |
| N246  | P02790  | R.GHGHNR*GTGHGN*STHHGPEYM#R.C        |
| N240  | P02790  | R.N*GTGHGN*STHHGPEYM#R.C             |
| N246  | P02790  | R.N*GTGHGN*STHHGPEYM#R.C             |
| N240  | P02790  | R.GHGHNR*GTGHGN*STHHGPEYMR.C         |
| N246  | P02790  | R.GHGHNR*GTGHGN*STHHGPEYMR.C         |
| N240  | P02790  | R.N*GTGHGN*STHHGPEYMR.C              |
| N246  | P02790  | R.N*GTGHGN*STHHGPEYMR.C              |
| N246  | P02790  | R.NGTGHGN*STHHGPEYM#R.C              |
| N187  | P02790  | R.SWPAVGN*CSSALR.W                   |
| N762  | P00450  | K.ELHHLQEQN*VSN AFLDKGEFYIGSK.Y      |
| N397  | P00450  | K.EN*LTAPGSDSAVFFEQGTTR.I            |
| N358  | P00450  | K.AGLQAFFQVQECN*K.S                  |
| N762  | P00450  | K.ELHHLQ*EQ*N*VSN*AFLDKGEFYIGSK.Y    |
| N397  | P00450  | K.EN*LTAPGSDSAVFFEQ*GTTR.I           |
| N358  | P00450  | K.AGLQ*AFFQVQECN*K.S                 |
| N138  | P00450  | K.EHEGAIYPD*TTDFQR.A                 |
| N762  | P00450  | K.ELHHLQEQN*VSN AFLDK.G              |
| N253  | P05155  | R.VLSN*NSDANLELINTWVAK.N             |
| N352  | P05155  | K.VGQLQLSHN*LSLVILVPQNLK.H           |
| N238  | P05155  | R.DTFVN*ASR.T                        |
| N86   | P04004  | K.NN*ATVHEQ*VGGPSLTSDLQAQSK.G        |
| N86   | P04004  | K.NN*ATVHEQVGGPSLTSDLQAQ*SK.G        |

| Site  | Protein | Modified Sequence                                   |
|-------|---------|-----------------------------------------------------|
| N86   | P04004  | K.NN*ATVHEQVGGPSLTSDLQAQSK.G                        |
| N86   | P04004  | K.N*N*ATVHEQVGGPSLTSDLQAQSK.G                       |
| N802  | P08603  | R.WDPEVN*CSM#AQIQLCPPPPQIPN*SHN*MTTTLN*YR.D         |
| N822  | P08603  | R.WDPEVN*CSM#AQIQLCPPPPQIPN*SHN*MTTTLN*YR.D         |
| N822  | P08603  | R.WDPEVNC SMAQIQLCPPPPQIPNSHN*MTTTLN*YR.D           |
| N802  | P08603  | R.WDPEVN*CSMAQIQLCPPPPQIPNSHNMTTTLN*YR.D            |
| N911  | P08603  | R.ISEEN*ETTCYM#GK.W                                 |
| N1029 | P08603  | K.M#DGASN*VTCINSR.W                                 |
| N1029 | P08603  | K.MDGASN*VTCINSR.W                                  |
| N882  | P08603  | K.IPCSQPPQIEHGTIN*SSR.S                             |
| N911  | P08603  | R.ISEEN*ETTCYMGK.W                                  |
| N1029 | P08603  | K.MDGASN*VTCIN*SR.W                                 |
| N882  | P08603  | K.IPCSQPPQ*IEHGTIN*SSR.S                            |
| N882  | P08603  | K.IPCSQ*PPQIEHGTIN*SSR.S                            |
| N103  | P10909  | K.LKELPGVCN*ETMMALWEECKPCLK.Q                       |
| N103  | P10909  | K.ELPGVCN*ETMMALWEECKPCLK.Q                         |
| N291  | P10909  | R.HN*STGCLR.M                                       |
| N354  | P10909  | K.M#LN*TSSLLEQLNEQFNWVSR.L                          |
| N354  | P10909  | K.MLN*TSSLLEQLNEQFNWVSR.L                           |
| N354  | P10909  | K.MLN*TSSLLEQ*LNEQFNWVSR.L                          |
| N354  | P10909  | K.MLN*TSSLLEQLN*EQFNWVSR.L                          |
| N86   | P10909  | K.EDALN*ETR.E                                       |
| N374  | P10909  | R.LAN*LTQGEDQYYLR.V                                 |
| N374  | P10909  | R.LAN*LTQ*GEDQYYLR.V                                |
| N183  | P02749  | R.DTAVFECLPQHAM#FGN*DTITCTTHGN*WTK.L                |
| N193  | P02749  | R.DTAVFECLPQHAM#FGN*DTITCTTHGN*WTK.L                |
| N183  | P02749  | R.DTAVFECLPQHAMFGN*DTITCTTHGN*WTK.L                 |
| N193  | P02749  | R.DTAVFECLPQHAMFGN*DTITCTTHGN*WTK.L                 |
| N162  | P02749  | R.VYKPSAGN*NSLYR.D                                  |
| N162  | P02749  | R.VYKPSAGN*N*SLYR.D                                 |
| N253  | P02749  | K.LGN*WSAM#PSCK.A                                   |
| N253  | P02749  | K.LGN*WSAMPSCK.A                                    |
| N517  | Q14624  | K.LPTQN*ITFQTESSVAEQEAEFQSPK.Y                      |
| N517  | Q14624  | K.LPTQ*N*ITFQTESSVAEQ*EAEFQSPK.Y                    |
| N517  | Q14624  | K.LPTQN*ITFQ*TESSVAEQEAEFQSPK.Y                     |
| N517  | Q14624  | K.LPTQ*N*ITFQTESSVAEQEAEFQSPK.Y                     |
| N577  | Q14624  | R.N*Q*ALN*LSLAYSFVTPLTSMVVTKPDDQEQ*SQ*VAEKPMEGESR.N |
| N517  | Q14624  | K.LPTQN*ITFQTESSVAEQ*EAEFQSPK.Y                     |
| N517  | Q14624  | K.LPTQN*ITFQ*TESSVAEQEAEFQ*SPK.Y                    |
| N517  | Q14624  | K.LPTQN*ITFQ*TESSVAEQ*EAEFQSPK.Y                    |
| N285  | P19827  | K.ICDLLVANNHFAHFFAPQN*LTNMNK.N                      |

| Site  | Protein | Modified Sequence                            |
|-------|---------|----------------------------------------------|
| N285  | P19827  | K.ICDLLVANNHFAHFFAPQ*N*LTNMNK.N              |
| N285  | P19827  | R.DKICDLLVAN*N*HFAHFFAPQ*N*LTNMNK.N          |
| N285  | P19827  | K.ICDLLVAN*N*HFAHFFAPQN*LTNMN*K.N            |
| N125  | P04196  | R.VIDFN*CTTSSVSSALAN*TK.D                    |
| N125  | P04196  | R.VIDFN*CTTSSVSSALANTK.D                     |
| N344  | P04196  | R.HSHNN*NSSDLHPHK.H                          |
| N345  | P04196  | R.HSHNNN*SSDLHPHK.H                          |
| N169  | P01042  | R.HGIQYFNN*N*TQ*HSSLFMLNEVK.R                |
| N294  | P01042  | K.LNAENN*ATFYFK.I                            |
| N294  | P01042  | K.LNAEN*N*ATFYFK.I                           |
| N205  | P01042  | R.ITYSIVQTN*CSK.E                            |
| N383  | O75882  | R.EWLPLN*R.S                                 |
| N428  | O75882  | R.VFHIHN*ESWVLLTPK.A                         |
| N1198 | O75882  | R.DLDMFIN*ASK.N                              |
| N1043 | O75882  | K.MPSQAPTGNFYQPPLLN*SSMCLEDSR.Y              |
| N1073 | O75882  | K.CIN*QSICEK.C                               |
| N914  | O75882  | K.AATCINPLN*GSVCERPAN*HSAK.Q                 |
| N923  | O75882  | K.AATCINPLN*GSVCERPAN*HSAK.Q                 |
| N264  | O75882  | K.ISN*SSDTVECECSENWK.G                       |
| N731  | O75882  | R.N*HSCSEGQISIFR.Y                           |
| N252  | P51884  | R.LSHN*ELADSGIPGN*SFN*VSSLVELDLSYNK.L        |
| N160  | P51884  | K.LGSFEGLVN*LTFIHLQHNR.L                     |
| N252  | P51884  | R.LSHNELADSGIPGN*SFN*VSSLVELDLSYNK.L         |
| N88   | P51884  | K.AFEN*VTDLQ*WLILDHN*LLENSK.I                |
| N88   | P51884  | K.AFEN*VTDLQWLILDHNLLENSK.I                  |
| N127  | P51884  | K.KLHINHNN*LTESVGPLPK.S                      |
| N127  | P51884  | K.KLHINHNN*N*LTESVGPLPK.S                    |
| N127  | P51884  | K.LHINHNN*LTESVGPLPK.S                       |
| N127  | P51884  | K.LHIN*HNN*LTESVGPLPK.S                      |
| N506  | P04003  | R.LSVDKDQYVEPEN*VTIQ*CDSGYGVVGPQ*SITCSGN*R.T |
| N528  | P04003  | R.LSVDKDQYVEPEN*VTIQ*CDSGYGVVGPQ*SITCSGN*R.T |
| N506  | P04003  | R.LSVDKDQYVEPEN*VTIQCDSGYGVVGPQSITCSGN*R.T   |
| N528  | P04003  | R.LSVDKDQYVEPEN*VTIQCDSGYGVVGPQSITCSGN*R.T   |
| N506  | P04003  | R.LSVDKDQYVEPEN*VTIQCDSGYGVVGPQ*SITCSGN*R.T  |
| N528  | P04003  | R.LSVDKDQYVEPEN*VTIQCDSGYGVVGPQ*SITCSGN*R.T  |
| N506  | P04003  | R.LSVDKDQYVEPEN*VTIQ*CDSGYGVVGPQSITCSGN*R.T  |
| N528  | P04003  | R.LSVDKDQYVEPEN*VTIQ*CDSGYGVVGPQSITCSGN*R.T  |
| N221  | P04003  | R.FSLLGHASISCTVEN*ETIGVWRPSPPTCEK.I          |
| N528  | P04003  | R.LSVDKDQ*YVEPENVTIQ*CDSGYGVVGPQ*SITCSGN*R.T |
| N143  | P00734  | R.SRYPHKPEIN*STTHPGADLQENFCR.N               |
| N143  | P00734  | R.SRYPHKPEIN*STTHPGADLQ*ENFCR.N              |

| Site | Protein | Modified Sequence                  |
|------|---------|------------------------------------|
| N143 | P00734  | R.SRYPHKPEIN*STTHPGADLQ*EN*FCR.N   |
| N143 | P00734  | R.YPHKPEIN*STTHPGADLQENFCR.N       |
| N143 | P00734  | R.YPHKPEIN*STTHPGADLQ*EN*FCR.N     |
| N118 | P19823  | K.GAFISN*FSM#TVDGK.T               |
| N118 | P19823  | K.GAFISN*FSMTVDGK.T                |
| N49  | P05546  | K.N*LSM#PLLPADFHK.E                |
| N49  | P05546  | K.N*LSMPLLPADFHK.E                 |
| N188 | P05546  | K.DFVN*ASSK.Y                      |
| N98  | P05090  | R.ADGTVNQIEGEATPVN*LTEPAKLEVK.F    |
| N65  | P05090  | R.CIQAN*YSLM#EN GK.I               |
| N65  | P05090  | R.CIQAN*YSLMENGK.I                 |
| N98  | P05090  | R.ADGTVN*QIEGEATPVN*LTEPAK.L       |
| N65  | P05090  | R.CIQAN*YSLMEN*GK.I                |
| N98  | P05090  | R.ADGTVNQIEGEATPVN*LTEPAK.L        |
| N308 | P00747  | R.GNVAVTVSGHTCQHWSAQTPHHTN*R.T     |
| N156 | P02765  | K.VCQDCPLLAPLN*DTR.V               |
| N176 | P02765  | K.AALAAFNAQNN*GSNFQLEEISR.A        |
| N156 | P02765  | R.KVCQDCPLLAPLN*DTR.V              |
| N93  | P02763  | R.QDQCIYN*TTYLNVQR.E               |
| N56  | P02763  | K.WFYIASAFRN*EEYN*K.S              |
| N93  | P02763  | R.QDQCIYN*TTYLN*VQR.E              |
| N109 | P43652  | K.HN*FSHCCSK.V                     |
| N402 | P43652  | R.YAEDKFN*ETTEK.S                  |
| N33  | P43652  | R.DIENFN*STQK.F                    |
| N324 | P27169  | K.VTQVYAEN*GTVLQGSTVASVYK.G        |
| N324 | P27169  | K.VTQ*VYAEN*GTVLQ*GSTVASVYK.G      |
| N324 | P27169  | K.VTQVYAEN*GTVLQ*GSTVASVYK.G       |
| N253 | P27169  | K.HAN*WTLTPLK.S                    |
| N128 | P25311  | R.FGCEIENN*R.S                     |
| N128 | P25311  | R.FGCEIEN*N*R.S                    |
| N109 | P25311  | K.DIVEYYN*DSN*GSHVLQGR.F           |
| N112 | P25311  | K.DIVEYYN*DSN*GSHVLQGR.F           |
| N112 | P25311  | K.DIVEYYNDSN*GSHVLQGR.F            |
| N109 | P25311  | K.DIVEYYN*DSNGSHVLQGR.F            |
| N70  | P05156  | K.N*GTAVCATNR.R                    |
| N103 | P05156  | K.FLNN*GTCTAEGK.F                  |
| N103 | P05156  | K.FLN*N*GTCTAEGK.F                 |
| N177 | P05156  | K.LSDLSIN*STECLHVHCR.G             |
| N146 | P02745  | R.RNPPM#GGNVVIFDTVITNQEEPYN*HSGR.F |
| N146 | P02745  | R.RNPPMGGNVVIFDTVITNQEEPYN*HSGR.F  |
| N146 | P02745  | R.NPPMGGNVVIFDTVITN*QEEPYN*HSGR.F  |

| Site  | Protein | Modified Sequence                           |
|-------|---------|---------------------------------------------|
| N146  | P02745  | R.RN*PPM#GGNVVIFDTVITNQEEPQ*N*HSGR.F        |
| N406  | P09871  | R.YTCEEPYYMEN*GGGGEYHCAGN*GSWVN*EVLGPELPK.C |
| N174  | P09871  | K.NCGVN*CSGDVFTALIGEIASPNYPKYPENSR.C        |
| N174  | P09871  | K.N*CGVN*CSGDVFTALIGEIASPN*YPKYPEN*SR.C     |
| N170  | P01019  | R.LQAILGVPWKDKN*CTSR.L                      |
| N580  | Q08380  | R.TVIRPFYLTN*SSGVD.-                        |
| N125  | Q08380  | R.DAGVVCTN*ETR.S                            |
| N551  | Q08380  | K.AAIPALDTN*SSK.S                           |
| N398  | Q08380  | K.GLN*LTEDTYKPR.I                           |
| N192  | Q08380  | K.EPGSN*VTMSVDAECVPMVR.D                    |
| N174  | P49908  | K.CGN*CSLTTLK.D                             |
| N174  | P49908  | K.KCGN*CSLTTLKDEDFCK.R                      |
| N174  | P49908  | K.CGN*CSLTTLKDEDFCKR.V                      |
| N174  | P49908  | K.CGN*CSLTTLKDEDFCK.R                       |
| N83   | P49908  | K.EGYSN*ISYIVVN*HQ*GISSR.L                  |
| N165  | P05543  | K.TLYETEVFSTDFSN*ISAAK.Q                    |
| N36   | P05543  | K.VTACHSSQPN*ATLYK.M                        |
| N437  | P07357  | R.GGSSGWSGGLAQN*R.S                         |
| N453  | P03952  | R.IYSGILN*LSDITK.D                          |
| N308  | P03952  | K.IYPGVDFGGEELN*VTFVK.G                     |
| N396  | P03952  | R.IVGGTN*SSWGEWPWQVSLQVK.L                  |
| N321  | P80108  | R.NIN*YTER.G                                |
| N659  | P80108  | K.LGTSLSSGHVLM#N*GTLK.Q                     |
| N659  | P80108  | K.LGTSLSSGHVLMN*GTLK.Q                      |
| N307  | P80108  | R.N*LTTSLTESVDR.N                           |
| N108  | P29622  | R.SQILEGLGFN*LTELSESDVHR.G                  |
| N157  | P29622  | K.FLN*DTM#AVYEAK.L                          |
| N651  | P06681  | K.TMFPN*LTDVR.E                             |
| N112  | P06681  | R.LGSYPVGGN*VSFECEDGFILR.G                  |
| N621  | P06681  | K.QSVPAHFVALN*GSK.L                         |
| N467  | P06681  | K.LTDTICGVGN*MSAN*ASDQER.T                  |
| N471  | P06681  | K.LTDTICGVGN*MSAN*ASDQER.T                  |
| N348  | P22792  | K.LYLGSNN*LTALHPALFQN*LSK.L                 |
| N359  | P22792  | K.LYLGSNN*LTALHPALFQN*LSK.L                 |
| N359  | P22792  | K.LYLGSN*NLALHPALFQN*LSK.L                  |
| N74   | P22792  | R.AFGSNPN*LTK.V                             |
| N1067 | P07996  | K.VVN*STTGPEHLR.N                           |
| N360  | P07996  | K.KVSCPIMPCSN*ATVPDGECCPR.C                 |
| N360  | P07996  | K.VSCPIMPCSN*ATVPDGECCPR.C                  |
| N135  | O95445  | K.TELFSSSCPGGIM#LN*ETGQGYQR.F               |
| N135  | O95445  | K.TELFSSSCPGGIMLN*ETGQGYQR.F                |

| Site  | Protein | Modified Sequence                     |
|-------|---------|---------------------------------------|
| N135  | O95445  | K.TELFSSSSCPGGIMLN*ETGQGYQ*R.F        |
| N2790 | P04275  | R.TEPMQ*VALHCTN*GSVVYHEVLNAMECK.C     |
| N2223 | P04275  | R.HCDGN*VSSCGDHPSEGCF CPPDK.V         |
| N1515 | P04275  | K.IGEADFN*R.S                         |
| N2357 | P04275  | R.GLQPTLTNPGE CRPN*FTCACR.K           |
| N203  | P43251  | R.YQFNTNVVFSNN*GTLVDR.Y               |
| N119  | P43251  | K.DVQIIVFPEDGIHGFN*FTR.T              |
| N349  | P43251  | K.N*PVGLIGAEN*ATGETDPSHSK.F           |
| N349  | P43251  | K.NPVGLIGAEN*ATGETDPSHSK.F            |
| N580  | Q06033  | R.KNAHGEEKEN*LTAR.A                   |
| N580  | Q06033  | K.NAHGEEKEN*LTAR.A                    |
| N580  | Q06033  | K.N*AHGEEKEN*LTAR.A                   |
| N369  | P08185  | K.AVLQLNEEGVDTAGSTGVTLN*LTSKPIILR.F   |
| N369  | P08185  | K.AVLQLN*EEGVDTAGSTGVTLN*LTSKPIILR.F  |
| N96   | P08185  | R.AQLLQGLGFN*LTER.S                   |
| N64   | P20851  | K.KTLFCN*ASK.E                        |
| N64   | P20851  | K.TLFCN*ASK.E                         |
| N98   | P20851  | R.LGHCPDPVLVNGEFSSSGPVN*VSDK.I        |
| N98   | P20851  | R.LGHCPDPVLVN*GEFSSSGPVN*VSDK.I       |
| N285  | P00751  | K.IVLDPSGSM#N*IYLVLDGSDSIGASN*FTGAK.K |
| N85   | P06276  | K.WSDIWN*ATK.Y                        |
| N514  | P06276  | K.YGNPNETQNN*STSWPVFK.S               |
| N369  | P06276  | K.DN*NSIITR.K                         |
| N284  | P06276  | R.EN*ETEIK.C                          |
| N840  | Q13201  | R.KYQQN*MSHLEEK.L                     |
| N431  | Q13201  | K.VN*ESVVSIAAQK.F                     |
| N344  | Q13201  | K.KIDN*ISLTVNDVR.N                    |
| N981  | Q13201  | K.TQAALSN*LTCCIDR.S                   |
| N126  | P03951  | K.GINYN*SSVAK.S                       |
| N491  | P03951  | K.LETTVN*YTDSQRPICLPSKGDR.N           |
| N491  | P03951  | K.LETTVN*YTDSQRPICLPSK.G              |
| N450  | P03951  | R.VYSGILN*QSEIK.E                     |
| N444  | Q16610  | K.HIPGLIHN*MTAR.C                     |
| N186  | P02750  | R.KLPPGLLAN*FTLLR.T                   |
| N325  | P02750  | K.M#FSQN*DTR.C                        |
| N325  | P02750  | K.MFSQN*DTR.C                         |
| N367  | Q96PD5  | R.LEPVHLQLQCM#SQEQLAQVAAN*ATK.E       |
| N485  | Q96PD5  | R.GFGVAIVGN*YTAALPTEAALR.T            |
| N71   | P01591  | R.EN*ISDPTSPLR.T                      |
| N71   | P01591  | R.IIVPLNNREN*ISDPTSPLR.T              |
| N324  | P13671  | K.VLN*FTTK.A                          |

| Site  | Protein | Modified Sequence              |
|-------|---------|--------------------------------|
| N514  | P00736  | K.EHEAQSN*ASLDVFLGHTNVEELMK.L  |
| N221  | P00736  | R.CN*YSIR.V                    |
| N75   | Q9Y6R7  | R.LLISSLSESPASVSILSQ*ADN*TSK.K |
| N98   | P23142  | R.CATPHGDN*ASLEATFVK.R         |
| N150  | O14786  | K.RGPECSQN*YTTPSGVIK.S         |
| N522  | O14786  | K.IGYSNN*GSDWK.M               |
| N150  | O14786  | R.GPECSQN*YTTPSGVIK.S          |
| N93   | P19652  | R.QNQCFYN*SSYLNVR.E            |
| N73   | Q96IY4  | K.QVHFFVN*ASDVDNVK.A           |
| N189  | O75636  | R.VELEDFNGN*R.T                |
| N189  | O75636  | R.VELEDFN*GN*R.T               |
| N396  | P04278  | R.SHEIWITHSCPQSPGN*GTDASH.-    |
| N380  | P04278  | R.LDVDQALN*R.S                 |
| N196  | Q9UHG3  | K.LLHALGGDDFLGM#LN*R.T         |
| N196  | Q9UHG3  | K.LLHALGGDDFLGMLN*R.T          |
| N49   | P13473  | K.WQMN*FTVR.Y                  |
| N257  | P13473  | K.VASVININPN*TTHSTGSCR.S       |
| N243  | P07358  | K.EYESYDFERN*VTEK.M            |
| N128  | P15144  | K.KLN*YTLSQGHR.V               |
| N234  | P15144  | K.AEFN*ITLIHPK.D               |
| N181  | P40197  | K.LLDLSGNN*LTHLPK.G            |
| N44   | P04180  | K.AELSN*HTRPVILVPGCLGNQLEAK.L  |
| N180  | Q9UK55  | K.ETFFN*LSK.R                  |
| N295  | Q9UK55  | K.LPYQGN*ATMLVVLMEK.M          |
| N162  | P05160  | K.EHETCLAPELYN*GN*YSTTQK.T     |
| N545  | P05160  | K.HGVIISSSTVDTYEN*GSSVEYR.C    |
| N104  | P14151  | K.IGGIWTWVGTN*K.S              |
| N60   | P14151  | R.FCRDN*YTDLVAIQNK.A           |
| N78   | P41222  | K.SVVAPATDGGLN*LTSTFLR.K       |
| N51   | P41222  | R.WFSAGLASN*SSWLR.E            |
| N421  | P01833  | R.LSLLEEPGN*GTFTVILNQLTSR.D    |
| N110  | Q8IUK8  | R.STNHEPSEM#SN*R.T             |
| N110  | Q8IUK8  | R.STNHEPSEMSN*R.T              |
| N143  | P55058  | K.VSN*VSCQASVSR.M              |
| N31   | Q9H079  | K.ISN*FTN*KN*MK.E              |
| N845  | Q9H8L6  | K.FN*TTYINIGSSYPPEHGYFR.A      |
| N368  | P35858  | K.AGAFLGLTNVAVMN*LSGNCLR.N     |
| N382  | Q96KN2  | R.LVPHMN*VSAVEK.Q              |
| N108  | Q02985  | K.FVQGN*STEVACHPGYGLPK.A       |
| N1115 | Q7Z7M0  | R.GYQGDGISHCN*R.T              |
| N257  | P11597  | K.N*VSEDLPLPTFSPDLLGDSR.M      |



| Site  | Protein | Modified Sequence                           |
|-------|---------|---------------------------------------------|
| N619  | Q2TV78  | K.GTGN*DTVLNVALLN*VISNQEENIK.H              |
| N153  | P13598  | R.GN*ETLHYETFGK.A                           |
| N160  | Q9HDC9  | R.AGPN*GTLFVADAYK.G                         |
| N592  | Q16853  | R.YLYLASN*HSNK.W                            |
| N241  | Q16620  | K.HMN*ETSHTQGSLR.I                          |
| N282  | P08571  | R.CMWSSALNSLN*LSFAGLEQVPK.G                 |
| N116  | P17936  | R.GLCVN*ASAVSR.L                            |
| N433  | P00748  | R.N*HSCEPCQTLAVR.S                          |
| Site  |         | Modified Sequence                           |
| N70   | P01009  | R.QLAHQSN*STNIFFSPVSIATAFAMLSLGTK.A         |
| N107  | P01009  | K.ADTHDEILEGLN*FN*LTEIPEAQ*IHEGFQ*ELLR.T    |
| N107  | P01009  | K.ADTHDEILEGLN*FN*LTEIPEAQIHEGFQ*ELLR.T     |
| N185  | P04114  | K.QVLFLDVTYGN*CSTHFTVK.T                    |
| N983  | P04114  | K.QVFPGLN*YCTSGAYSN*ASSTDSASYYPPLTGDTR.L    |
| N2779 | P04114  | K.IQSPLFTLDANADIGN*GTTSANEAGIAASITAK.G      |
| N4431 | P04114  | K.DFHSEYIVSASN*FTSQLSSQVEQFLHR.N            |
| N4237 | P04114  | K.VHN*GSEILFSYFQDLVITLPEL.R                 |
| N869  | P01023  | K.SLGNVN*FTVSAEALQELCGTEVPSVPEHGRK.D        |
| N869  | P01023  | K.SLGN*VN*FTVSAEALQELCGTEVPSVPEHGRK         |
| N410  | P01023  | R.GN*EAN*YYSNATTDEHGLVQ*FSIN*TTNVMGTSLTVR.V |
| N410  | P01023  | R.GN*EAN*YYSNATTDEHGLVQFSIN*TTN*VMGTSLTVR.V |
| N396  | P01023  | R.GN*EANYYSN*ATTDEHGLVQFSIN*TTN*VMGTSLTVR.V |
| N410  | P01023  | R.GN*EANYYSN*ATTDEHGLVQFSIN*TTN*VMGTSLTVR.V |
| N128  | P01008  | K.LGACN*DTLQ*Q*LMEVFKFDTISEK.T              |
| N128  | P01008  | K.LGACN*DTLQ*QLMEVFKFDTISEK.T               |
| N209  | P01871  | R.GLTFQ*Q*N*ASSMCVPDQ*DTAIR.V               |
| N209  | P01871  | R.GLTFQ*Q*N*ASSMCVPDQDTAIR.V                |
| N279  | P01871  | K.THTNISESHPN*ATFSAVGEASICEDDWN*SGER.F      |
| N209  | P01871  | R.GLTFQ*QN*ASSMCVPDQDTAIR.V                 |
| N184  | P00738  | K.M#VSHHN*LTGATLIN*EQWLLTTAK.N              |
| N432  | P02787  | K.CGLVPVLAEN*YN*K.S                         |
| N630  | P02787  | R.QQQLHFGSN*VTDCSGN*FCLFR.S                 |
| N240  | P02790  | R.N*GTGHGNSTHHGPEYM#R.C                     |
| N802  | P08603  | R.WDPEVN*CSM#AQ*IQLCPPPQIPNSHN*MTTTLN*YR.D  |
| N822  | P08603  | R.WDPEVN*CSM#AQ*IQLCPPPQIPNSHN*MTTTLN*YR.D  |
| N802  | P08603  | R.WDPEVN*CSM#AQIQLCPPPQIPNSHN*MTTTLN*YR.D   |
| N822  | P08603  | R.WDPEVN*CSM#AQIQLCPPPQIPNSHN*MTTTLN*YR.D   |
| N802  | P08603  | R.WDPEVN*CSMAQ*IQ*LCPPPQ*IPNSHN#TTTLN.YR.D  |
| N802  | P08603  | R.WDPEVN*CSMAQ*IQ*LCPPPQ*IPNSHNMTTTLN.YR.D  |
| N1095 | P08603  | R.SPYEMFGDEEVMCLN*GN*WTEPPQCK.D             |
| N1095 | P08603  | R.SPYEMFGDEEVMCLN*GN*WTEPPQ*CK.D            |

| Site  | Protein | Modified Sequence                            |
|-------|---------|----------------------------------------------|
| N217  | P08603  | K.SPDVIN*GSPISQK.I                           |
| N352  | P05155  | K.VGQLQ*LSHN*LSLVILVPQNLK.H                  |
| N253  | P05155  | R.VLSN*N*SDANLELINTWVAK.N                    |
| N106  | P01011  | K.FN*LTETSEAEIHQ*SFQHLLR.T                   |
| N186  | P01011  | K.LINDYVKN*GTR.G                             |
| N517  | Q14624  | K.LPTQ*N*ITFQ*TESSVAEQEAEFQ*SPK.Y            |
| N81   | Q14624  | K.KAFITN*FSMIIDGMTYPGIK.E                    |
| N517  | Q14624  | K.LPTQ*N*ITFQTESSVAEQ*EAEFQ*SPK.Y            |
| N517  | Q14624  | K.LPTQN*ITFQTESSVAEQEAEFQ*SPK.Y              |
| N528  | P02751  | R.DQCIVDDITYNVN*DTFHK.R                      |
| N1007 | P02751  | K.LDAPTNLQ*FVN*ETDSTVLVR.W                   |
| N374  | P10909  | R.LAN*LTQGEDQ*YYLR.V                         |
| N103  | P10909  | K.ELPGVCN*ETM#MALWEECKPCLK.Q                 |
| N86   | P10909  | K.KKEDALN*ETR.E                              |
| N354  | P10909  | K.M#LN*TSSLLEQ*LNEQFN*WVSR.L                 |
| N354  | P10909  | K.MLN*TSSLLEQLN*EQ*FNWVSR.L                  |
| N506  | P04003  | R.LSVDKDQYVEPEN*VTIQCDSGYGVVGPQSITCSGNR.T    |
| N506  | P04003  | R.LSVDKDQ*YVEPEN*VTIQ*CDSGYGVVGPQ*SITCSGNR.T |
| N528  | P04003  | R.LSVDKDQ*YVEPENVTIQCDSGYGVVGPQSITCSGN*R.T   |
| N506  | P04003  | R.LSVDKDQ*YVEPEN*VTIQCDSGYGVVGPQ*SITCSGN*R.T |
| N528  | P04003  | R.LSVDKDQ*YVEPEN*VTIQCDSGYGVVGPQ*SITCSGN*R.T |
| N416  | P00734  | R.WVLTAAHCLLYPPWDKN*FTEN*DLLVR.I             |
| N143  | P00734  | R.SRYPHKPEIN*STTHPGADLQEN*FCR.N              |
| N344  | P04196  | R.HSHN*N*NSSDLHPHK.H                         |
| N344  | P04196  | R.HSHNN*N*SSDLHPHK.H                         |
| N183  | P02749  | R.DTAVFECLPQ*HAMFGN*DTITCTTHGN*WTK.L         |
| N193  | P02749  | R.DTAVFECLPQ*HAMFGN*DTITCTTHGN*WTK.L         |
| N285  | P19827  | R.DKICDLLVANN*HFAHFFAPQ*N*LTNMNK.N           |
| N285  | P19827  | R.DKICDLLVANNHFAHFFAPQ*N*LTNMNK.N            |
| N285  | P19827  | K.ICDLLVANN*HFAHFFAPQN*LTNMNK.N              |
| N285  | P19827  | R.DKICDLLVANNHFAHFFAPQN*LTNMNK.N             |
| N86   | P04004  | K.NN*ATVHEQ*VGGPSLTSDLQAQ*SK.G               |
| N252  | P51884  | R.LSHN*ELADSGIPGNSFN*VSSLVELDLSYNK.L         |
| N88   | P51884  | K.AFEN*VTDLQ*WLILDHNLENSK.I                  |
| N127  | P51884  | K.LHINHN*N*LTESVGPLPK.S                      |
| N294  | P01042  | K.LN*AENN*ATFYFK.I                           |
| N98   | P05090  | R.ADGTVNQ*IEGEATPVN*LTEPAKLEVK.F             |
| N65   | P05090  | R.CIQAN*YSLM#EN*GK.I                         |
| N98   | P05090  | R.ADGTVN*Q*IEGEATPVN*LTEPAK.L                |
| N65   | P05090  | R.CIQ*AN*YSLMENGK.I                          |
| N93   | P02763  | R.QDQ*CIYN*TTYLVNQR.E                        |

| Site  | Protein | Modified Sequence                                 |
|-------|---------|---------------------------------------------------|
| N33   | P43652  | R.DIENFN*STQ*K.F                                  |
| N300  | O75882  | R.GICN*SSDVR.G                                    |
| N324  | P27169  | K.VTQ*VYAEN*GTVLQGSTVASVYK.G                      |
| N146  | P02745  | R.NPPM#GGNVVIFDTVITNQ*EOPYQN*HSGR.F               |
| N146  | P02745  | R.NPPMGGNVVIFDTVITNQEOPYQN*HSGR.F                 |
| N157  | P29622  | K.FLN*DTMAVYEA.K                                  |
| N238  | P29622  | K.DFYVDEN*TTVR.V                                  |
| N494  | P03952  | K.LQAPLN*YTEFQKPICLPSK.G                          |
| N367  | Q96PD5  | R.LEPVHLQLQCM#SQEQ*LAQ*VAAN*ATK.E                 |
| N367  | Q96PD5  | R.LEPVHLQLQCMSQEQLAQVAAN*ATK.E                    |
| N203  | P43251  | R.YQ*FNTNVVFSNN*GTLVDR.Y                          |
| N203  | P43251  | R.YQFNTN*VVFSNN*GTLVDR.Y                          |
| N119  | P43251  | K.DVQ*IIVFPEDGIHGFN*FTR.T                         |
| N150  | P43251  | R.FN*DTEVLQR.L                                    |
| N111  | P22792  | R.LEDLEVTGSSFLN*LSTNIFSN*LTSLGK.L                 |
| N119  | P22792  | R.LEDLEVTGSSFLN*LSTNIFSN*LTSLGK.L                 |
| N415  | P02748  | R.AVN*ITSENLIDDVVSLIR.G                           |
| N162  | P05160  | R.KEHETCLAPELYNGN*YSTTQK.T                        |
| N162  | P05160  | K.EHETCLAPELYNGN*YSTTQK.T                         |
| N406  | P09871  | R.YTCEEPYYMENGGGGEYHCAGN*GSWVN*EVLGPELPK.C        |
| N83   | P49908  | K.EGYSN*ISYIVVNHQGISSR.L                          |
| N285  | P00751  | K.IVLDPSGSMN*IYLVDGSDSIGASN*FTGAK.K               |
| N73   | Q96IY4  | K.KQVHFFVN*ASDVDNVK.A                             |
| N135  | O95445  | K.TELFSSSCP GGIMLN*ETGQ*GYQR.F                    |
| N509  | P06276  | K.YGNPN*ETQNN*STSWPVFK.S                          |
| N514  | P06276  | K.YGNPN*ETQNN*STSWPVFK.S                          |
| N154  | P20851  | R.DCDPPGNPVHGYFEGNN*FTLGSTISYYCEDR.Y              |
| N211  | P04275  | R.ASPSSSCN*ISSGEMQK.G                             |
| N363  | P04217  | R.FQ*SPAGTEALFELHN*ISVADSANYSCVYVDLKPFFGGSAPSER.L |
| N90   | P01833  | R.ANLTNFPEN*GTFVVN*IAQLSQDDSGR.Y                  |
| N541  | Q13201  | K.NAPAAESVSNN*VTEYMSTLHENIK.K                     |
| N431  | Q13201  | K.VN*ESVVSIAAQ*QK.F                               |
| N125  | P00736  | K.MLLTFHTDFSNEEN*GTIMFYK.G                        |
| N64   | P55058  | K.EGHFYYN*ISEVK.V                                 |
| N468  | Q04756  | R.DSVSVVLGQHFFN*R.T                               |
| N290  | Q04756  | R.CFLGN*GTGYR.G                                   |
| N686  | P02671  | R.MDGSLNFN*R.T                                    |
| N282  | P08571  | R.CMWSSALN*SLN*LSFAGLEQVPK.G                      |
| N151  | P08571  | R.N*VSWATGR.S                                     |
| N5186 | Q9Y6R7  | R.YLPVN*SSLLTSDCSER.C                             |
| N63   | P55056  | R.MKELLETVVN*R.T                                  |

| Site  | Protein | Modified Sequence                              |
|-------|---------|------------------------------------------------|
| N63   | P55056  | K.ELLETVVN*R.T                                 |
| N619  | Q2TV78  | K.GTGN*DTVLNVALLNVISNQECNIK.H                  |
| N638  | P55290  | K.IN*NTHALVSLQLNLK.A                           |
| N136  | P17936  | R.AYLLPAPPAPGN*ASESEEDR.S                      |
| N433  | P00748  | R.RN*HSCEPCQTLAVR.S                            |
| N108  | Q02985  | R.KFVQGN*STEVACHPGYGLPK.A                      |
| N353  | O95497  | K.LTGVAGN*YTVCQK.D                             |
| N403  | Q6UXB8  | K.SLPNFPN*TSATAN*ATGGR.A                       |
| N409  | Q6UXB8  | K.SLPNFPN*TSATAN*ATGGR.A                       |
| N101  | Q16609  | R.WEYCN*LTR.C                                  |
| N117  | Q6EMK4  | R.LHEITN*ETFR.G                                |
| N88   | Q9UJJ9  | K.YEFCPFHN*VTQHEQTFR.W                         |
| N999  | Q12840  | K.AN*MDN*GN*ATDINDNR.S                         |
| N1159 | Q92954  | R.N*GTLVAFR.G                                  |
| N85   | P80188  | K.SYN*VTSVLFR.K                                |
| N285  | P36955  | K.VTQN*LTLIEESLTSEFIHDIDR.E                    |
| N3465 | P04114  | K.YDFN*SSMLYSTAK.G                             |
| N2239 | P04114  | K.TIHDLHLFIENIDFN*KSGSSTASWIQ*NVDTK.Y          |
| N2779 | P04114  | K.IQSPLFTLDAN*ADIGN*GTTSANEAGIAASITAK.G        |
| N107  | P01009  | K.ADTHDEILEGLN*FN*LTEIPEAQ*IHEGFQELLR.T        |
| N70   | P01009  | R.QLAHQSN*STNIFFSPVSIATAFAM#LSLGTK.A           |
| N869  | P01023  | K.SLGNVN*FTVSAAELESQ*ELCGTEVPSVPEHGRK.D        |
| N410  | P01023  | R.GNEANYYSNATTDEHGLVQ*FSIN*TTN*VMGTSLTVR.V     |
| N396  | P01023  | R.GNEANYYSN*ATTDEHGLVQ*FSIN*TTN*VMGTSLTVR.V    |
| N410  | P01023  | R.GNEANYYSN*ATTDEHGLVQ*FSIN*TTN*VMGTSLTVR.V    |
| N410  | P01023  | R.GN*EAN*YYSNATTDEHGLVQ*FSIN*TTN*VMGTSLTVR.V   |
| N1424 | P01023  | K.VSN*QTLSLFFTVLQDVPVR.D                       |
| N128  | P01008  | K.LGACN*DTLQ*Q*LM#EVFKFDTISEK.T                |
| N209  | P01871  | R.GLTFQ*QN*ASSMCVPDQ*DTAIR.V                   |
| N279  | P01871  | K.THTNISESHPN*ATFSAVGEASICEDDWSNGER.F          |
| N630  | P02787  | R.QQHLFGSN*VTDCSGNFCLFR.S                      |
| N226  | P0C0L4  | R.FSDGLESN*SSTQ*FEVK.K                         |
| N453  | P02790  | K.ALQ*PQN*VTSLLGCTH.-                          |
| N802  | P08603  | R.WDPEVN*CSM#AQ*IQ*LCPPPPQ*IPN*SHN*MTTTLN.YR.D |
| N822  | P08603  | R.WDPEVN*CSM#AQ*IQ*LCPPPPQ*IPN*SHN*MTTTLN.YR.D |
| N802  | P08603  | R.WDPEVN*CSMAQ*IQ*LCPPPPQIPNSHN*MTTTLN*YR.D    |
| N822  | P08603  | R.WDPEVN*CSMAQ*IQ*LCPPPPQIPNSHN*MTTTLN*YR.D    |
| N822  | P08603  | R.WDPEVNC SMAQIQLCPPPPQIPN*SHN*MTTTLN.YR.D     |
| N1095 | P08603  | R.SPYEMFGDEEVMCLNGN*WTEPPQCK.D                 |
| N762  | P00450  | K.ELHHLQEQN*VSN*AFLDKGEFYIGSK.Y                |
| N762  | P00450  | K.ELHHLQ*EQN*VSNAFLDK.G                        |

| Site  | Protein | Modified Sequence                           |
|-------|---------|---------------------------------------------|
| N106  | P01011  | K.GLKFN*LTETSEAEIHQSFQHLLR.T                |
| N106  | P01011  | K.FN*LTETSEAEIHQSFQ*HLLR.T                  |
| N127  | P01011  | R.TLN*QSSDELQLSMGN*AMFVK.E                  |
| N127  | P01011  | R.TLN*QSSDELQLSM#GNAM#FVK.E                 |
| N430  | P02751  | R.GGNSNGALCHFPFLYNNHN*YTDCTSEGR.R           |
| N352  | P05155  | K.VGQ*LQLSHN*LSLVILVPQNLK.H                 |
| N253  | P05155  | R.VLSN*N*SDANLELIN*TWVAK.N                  |
| N517  | Q14624  | K.LPTQ*N*ITFQTESSVAEQEAEFQ*SPK.Y            |
| N81   | Q14624  | K.AFITN*FSMIIDGMTYPGIK.E                    |
| N285  | P19827  | K.ICDLLVANNHFAHFFAPQN*LTNM#NK.N             |
| N285  | P19827  | R.DKICDLLVANN*HFAHFFAPQN*LTNMNK.N           |
| N285  | P19827  | R.DKICDLLVANNHFAHFFAPQN*LTNMN*K.N           |
| N285  | P19827  | R.DKICDLLVAN*NHFAHFFAPQN*LTNMNK.N           |
| N285  | P19827  | K.ICDLLVAN*N*HFAHFFAPQ*N*LTNMNK.N           |
| N86   | P04004  | K.NN*ATVHEQ*VGGPSLTSDLQ*AQSK.G              |
| N86   | P04004  | K.N*N*ATVHEQ*VGGPSLTSDLQ*AQ*SK.G            |
| N86   | P04004  | K.N*N*ATVHEQ*VGGPSLTSDLQAQSK.G              |
| N354  | P10909  | K.M#LN*TSSLLEQ*LNEQFNWVSR.L                 |
| N354  | P10909  | K.MLN*TSSLLEQLNEQFN*WVSR.L                  |
| N506  | P04003  | R.LSVDKDQ*YVEPEN*VTIQCDSGYGVVGPQSITCSGN*R.T |
| N528  | P04003  | R.LSVDKDQ*YVEPEN*VTIQCDSGYGVVGPQSITCSGN*R.T |
| N193  | P02749  | R.DTAVFECLPQ*HAMFGNDTITCTTHGN*WTKLPECR.E    |
| N183  | P02749  | R.DTAVFECLPQ*HAMFGN*DTITCTTHGN*WTKLPECR.E   |
| N193  | P02749  | R.DTAVFECLPQ*HAMFGN*DTITCTTHGN*WTKLPECR.E   |
| N252  | P51884  | R.LSHNELADSGIPGNSFN*VSSLVELDLSYNK.L         |
| N93   | P02763  | R.Q*DQ*CIYN*TTYLNVQ*R.E                     |
| N72   | P02763  | K.SVQEIQATFFYFTPN*KTEDTIFLR.E               |
| N33   | P43652  | R.DIEN*FN*STQK.F                            |
| N360  | P07996  | K.KVSCPIM#PCSN*ATVPDGECCPR.C                |
| N324  | P27169  | K.VTQVYAEN*GTVLQ*GSTVASVYKGL.L              |
| N98   | P05090  | R.ADGTVN*QIEGEATPVN*LTEPAKLEVK.F            |
| N169  | P01042  | R.HGIQYFNN*NTQHSSLFMLNEVK.R                 |
| N367  | Q96PD5  | R.LEPVHLQLQ*CM#SQEQLAQVAAN*ATK.E            |
| N146  | P02745  | R.NPPM#GGN*VVIFDTVITNQEOPYQN*HSGR.F         |
| N174  | P09871  | K.N*CGVN*CSGDVFTALIGEIASPN*YPKYPENS.R.C     |
| N174  | P09871  | K.NCGVN*CSGDVFTALIGEIASPN*YPKYPEN*SR.C      |
| N345  | P04196  | R.HSHN*NN*SSDLHPHK.H                        |
| N621  | P06681  | K.Q*SVPAHFVALN*GSK.L                        |
| N203  | P43251  | R.YQFNTNVVFSN*N*GTLVDR.Y                    |
| N2546 | P04275  | R.N*VSCPQLEVPVCPSGFQLSCK.T                  |
| N2790 | P04275  | R.TEPMQVALHCTN*GSVVYHEVLNAMECK.C            |

| Site | Protein | Modified Sequence                     |
|------|---------|---------------------------------------|
| N933 | Q13201  | K.TLHEVLTMCHN*ASTSVSELN*ATIPK.W       |
| N942 | Q13201  | K.TLHEVLTMCHN*ASTSVSELN*ATIPK.W       |
| N840 | Q13201  | R.KYQQ*N*MSHLEEK.L                    |
| N816 | Q13201  | R.DEKLN*Q*SNFQK.M                     |
| N359 | P22792  | K.LYLGSNNLTALHPALFQ*N*LSK.L           |
| N369 | P08185  | K.AVLQ*LN*EEGVDTAGSTGVTLN*LTSKPIILR.F |
| N69  | Q08380  | R.ALGFEN*ATQALGR.A                    |
| N469 | P01833  | K.VPGN*VTAVLGETLK.V                   |
| N296 | P26927  | R.GTAN*TTTAGVPCQR.W                   |
| N818 | P15144  | R.N*ATLVNEADKLR.A                     |
| N339 | Q99551  | K.IDCLMEEN*ISISQIENPR.V               |
| N82  | Q16890  | K.QN*FSKSWHDMQ*TTTAYKK.T              |
| N296 | P04180  | R.MAWPEDHVFISTPSFN*YTGR.D             |
| N442 | P33151  | R.EVYPWYN*LTVEAK.E                    |
| N92  | P0DP01  | R.N*TSISTAYMELSSLR.S                  |
| N365 | P08195  | K.DASSFLAEWQN*ITK.G                   |
| N494 | Q12860  | R.GKAN*STGTLVITDPTR.I                 |

Table S5. The identified amounts of *N*-glycopeptides, *N*-glycosylation sites and *N*-glycoproteins from 2  $\mu$ L of human serum digest by poly(MT)@MAR, poly(TC)@MAR and poly(IM)@MAR

|              | <i>N</i> -glycopeptides | <i>N</i> -glycosylation sites | <i>N</i> -glycoproteins |
|--------------|-------------------------|-------------------------------|-------------------------|
| Poly(MT)@MAR | 547                     | 286                           | 128                     |
| Poly(TC)@MAR | 694                     | 372                           | 170                     |
| Poly(IM)@MAR | 669                     | 355                           | 161                     |

Table S6. *N*-glycopeptides enriched by poly(TC)@MAR from 2  $\mu$ L of human serum digest

| <b>Site</b> | <b>Protein</b> | <b>Modified Sequence</b>                    |
|-------------|----------------|---------------------------------------------|
| N869        | P01023         | K.SLGN*VN*FTVSAEALESQELCGTEVPSVPEHGRK.D     |
| N869        | P01023         | K.SLGNVN*FTVSAEALESQELCGTEVPSVPEHGR.K       |
| N869        | P01023         | K.SLGNVN*FTVSAEALESQELCGTEVPSVPEHGRK.D      |
| N869        | P01023         | K.SLGN*VN*FTVSAEALESQELCGTEVPSVPEHGR.K      |
| N869        | P01023         | K.SLGNVN*FTVSAEALESQ*ELCGTEVPSVPEHGR.K      |
| N396        | P01023         | R.GN*EAN*YYSN*ATTDEHGLVQFSIN*TTNVMGTSLTVR.V |
| N410        | P01023         | R.GN*EAN*YYSN*ATTDEHGLVQFSIN*TTNVMGTSLTVR.V |
| N869        | P01023         | K.SLGNVN*FTVSAEALESQ*ELCGTEVPSVPEHGRK.D     |
| N396        | P01023         | R.GNEANYYSN*ATTDEHGLVQFSIN*TTNVMGTSLTVR.V   |
| N410        | P01023         | R.GNEANYYSN*ATTDEHGLVQFSIN*TTNVMGTSLTVR.V   |

| Site  | Protein | Modified Sequence                            |
|-------|---------|----------------------------------------------|
| N410  | P01023  | R.GNEANYYSNATTDEHGLVQ*FSIN*TTNVMGTSLTVR.V    |
| N410  | P01023  | R.GNEANYYSNATTDEHGLVQFSIN*TTN*VMGTSLTVR.V    |
| N396  | P01023  | R.GN*EANYYSN*ATTDEHGLVQ*FSIN*TTNVMGTSLTVR.V  |
| N410  | P01023  | R.GN*EANYYSN*ATTDEHGLVQ*FSIN*TTNVMGTSLTVR.V  |
| N396  | P01023  | R.GNEAN*YYSN*ATTDEHGLVQ*FSINTTN*VMGTSLTVR.V  |
| N396  | P01023  | R.GNEANYYSN*ATTDEHGLVQ*FSIN*TTNVMGTSLTVR.V   |
| N410  | P01023  | R.GNEANYYSN*ATTDEHGLVQ*FSIN*TTNVMGTSLTVR.V   |
| N55   | P01023  | K.GCVLLSYLN*ETVTVSASLESVR.G                  |
| N410  | P01023  | R.GN*EANYYSNATTDEHGLVQFSIN*TTN*VMGTSLTVR.V   |
| N396  | P01023  | R.GNEAN*YYSN*ATTDEHGLVQ*FSIN*TTN*VMGTSLTVR.V |
| N410  | P01023  | R.GNEAN*YYSN*ATTDEHGLVQ*FSIN*TTN*VMGTSLTVR.V |
| N410  | P01023  | R.GN*EAN*YYSNATTDEHGLVQFSIN*TTN*VMGTSLTVR.V  |
| N396  | P01023  | R.GNEANYYSN*ATTDEHGLVQ*FSIN*TTN*VMGTSLTVR.V  |
| N410  | P01023  | R.GNEANYYSN*ATTDEHGLVQ*FSIN*TTN*VMGTSLTVR.V  |
| N1424 | P01023  | R.TEVSSNHVLIYLDKVSQ*QTLN*VSLVMSDTAGTCY.-     |
| N869  | P01023  | K.SLGN*VN*FTVSAEALQS*ELCGTEVPSVPEHGR.K       |
| N1424 | P01023  | R.TEVSSNHVLIYLDKVSQ*QTLN*VSLVMSDTAGTCY.-     |
| N410  | P01023  | R.GNEANYYSNATTDEHGLVQ*FSIN*TTN*VMGTSLTVR.V   |
| N1424 | P01023  | R.TEVSSNHVLIYLDKVSQ*Q*TLN*VSLVMSDTAGTCY.-    |
| N1424 | P01023  | R.TEVSSNHVLIYLDKVSQ*Q*TLN*VSLVMSDTAGTCY.-    |
| N46   | P01871  | K.YKN*NSDISSTR.G                             |
| N440  | P01871  | K.STGKPTLYN*VSLVMSDTAGTCY.-                  |
| N272  | P01871  | K.THTN*ISESHPN*ATFSAVGEASICEDDWN*SGER.F      |
| N279  | P01871  | K.THTN*ISESHPN*ATFSAVGEASICEDDWN*SGER.F      |
| N272  | P01871  | K.THTN*ISESHPN*ATFSAVGEASICEDDWN*SGER.F      |
| N279  | P01871  | K.THTN*ISESHPN*ATFSAVGEASICEDDWN*SGER.F      |
| N440  | P01871  | K.STGKPTLYN*VSLVMSDTAGTCY.-                  |
| N46   | P01871  | K.YKN*NSDISSTR.G                             |
| N209  | P01871  | R.GLTFQQN*ASSMCPDQDTAIR.V                    |
| N209  | P01871  | R.GLTFQQN*ASSM#CVPDQ*DTAIR.V                 |
| N209  | P01871  | R.GLTFQQN*ASSM#CVPDQDTAIR.V                  |
| N209  | P01871  | R.GLTFQ*QN*ASSMCPDQDTAIR.V                   |
| N209  | P01871  | R.GLTFQQN*ASSMCPDQ*DTAIR.V                   |
| N209  | P01871  | R.GLTFQQ*N*ASSMCPDQDTAIR.V                   |
| N983  | P04114  | K.QVFPGLNYCTSGAYSN*ASSTDSASYPLTGDTR.L        |
| N3895 | P04114  | R.FEVDSVYVY*ATWSASLK.N                       |
| N2239 | P04114  | K.TIHDLHLFIENIDFN*K.S                        |
| N185  | P04114  | K.QVFLDFTVYGN*CSTHFTVK.T                     |
| N2779 | P04114  | K.IQSPLFTLDANADIGN*GTTSANEAGIAASITAK.G       |
| N3336 | P04114  | K.ELCTISHIFIPAMGN*ITYDFSFK.S                 |
| N4431 | P04114  | K.DFHSEYIVSASN*FTSQ*LSSQVEQ*FLHR.N           |



| Site  | Protein | Modified Sequence                                 |
|-------|---------|---------------------------------------------------|
| N2779 | P04114  | K.IQSPLFTLDAN*ADIGN*GTTSAN*EAGIAASITAK.G          |
| N2779 | P04114  | K.IQ*SPLFTLDANADIGN*GTTSANEAGIAASITAK.G           |
| N3411 | P04114  | K.FVEGSHN*STVSLTTK.N                              |
| N1523 | P04114  | R.FN*SSYLQGTN*QITGR.Y                             |
| N1523 | P04114  | R.FN*SSYLQGTNQ*ITGR.Y                             |
| N1523 | P04114  | R.FN*SSYLQGTNQITGR.Y                              |
| N3465 | P04114  | K.YDFN*SSM#LYSTAK.G                               |
| N2982 | P04114  | R.VNQNLVYESGSLN*FSK.L                             |
| N3465 | P04114  | K.YDFN*SSMLYSTAK.G                                |
| N184  | P00738  | K.M#VSHHN*LTTGATLINEQWLLTTAK.N                    |
| N184  | P00738  | K.MVSHHN*LTTGATLINEQWLLTTAK.N                     |
| N184  | P00738  | K.M#VSHHN*LTTGATLIN*EQWLLTTAK.N                   |
| N184  | P00738  | K.MVSHHN*LTTGATLIN*EQWLLTTAK.N                    |
| N184  | P00738  | K.MVSHHN*LTTGATLINEQ*WLLTTAK.N                    |
| N241  | P00738  | K.VVLHPN*YSQ*VDIGLIK.L                            |
| N184  | P00738  | K.MVSHHN*LTTGATLIN*EQ*WLLTTAK.N                   |
| N211  | P00738  | K.NLFLNHSEN*ATAK.D                                |
| N207  | P00738  | K.NLFLN*HSENATAK.D                                |
| N207  | P00738  | K.NLFLN*HSEN*ATAK.D                               |
| N211  | P00738  | K.NLFLN*HSEN*ATAK.D                               |
| N207  | P00738  | K.N*LFLN*HSEN*ATAK.D                              |
| N211  | P00738  | K.N*LFLN*HSEN*ATAK.D                              |
| N241  | P00738  | K.VVLHPN*YSQVDIGLIK.L                             |
| N802  | P08603  | R.WDPEVN*CSMAQ*IQ*LCPPPPQ*IPN*SHN*M#TTTLN.YR.D    |
| N822  | P08603  | R.WDPEVN*CSMAQ*IQ*LCPPPPQ*IPN*SHN*M#TTTLN.YR.D    |
| N822  | P08603  | R.WDPEVNC SMAQIQLCPPPPQ*IPN*SHN*MTTTLN.YR.D       |
| N802  | P08603  | R.WDPEVN*CSMAQ*IQLCPPPPQIPNSHN*MTTTLN*YR.D        |
| N822  | P08603  | R.WDPEVN*CSMAQ*IQLCPPPPQIPNSHN*MTTTLN*YR.D        |
| N802  | P08603  | R.WDPEVN*CSMAQIQ*LCPPPPQ*IPN*SHN*MTTTLN*YR.D      |
| N822  | P08603  | R.WDPEVN*CSMAQIQ*LCPPPPQ*IPN*SHN*MTTTLN*YR.D      |
| N1095 | P08603  | R.SPYEM#FGDEEVMCLNGN*WTEPPQ*CK.D                  |
| N529  | P08603  | K.LN*DTLDYEC HDGYESN*TGSTTGSIVCGYN*GWS DLPICYER.E |
| N1095 | P08603  | R.SPYEMFGDEEVMCLN*GN*WTEPPQCK.D                   |
| N1095 | P08603  | R.SPYEMFGDEEVMCLNGN*WTEPPQCK.D                    |
| N911  | P08603  | R.ISEEN*ETTCYM#GK.W                               |
| N1029 | P08603  | K.M#DGASN*VTCINSR.W                               |
| N1029 | P08603  | K.MDGASN*VTCIN*SR.W                               |
| N1029 | P08603  | K.MDGASN*VTCINSR.W                                |
| N911  | P08603  | R.ISEEN*ETTCYMGK.W                                |
| N882  | P08603  | K.IPCSQPPQIEHGTIN*SSR.S                           |
| N882  | P08603  | K.IPCSQPPQ*IEHGTIN*SSR.S                          |

| Site  | Protein | Modified Sequence                          |
|-------|---------|--------------------------------------------|
| N217  | P08603  | K.SPDVIN*GSPISQK.I                         |
| N802  | P08603  | R.WDPEVN*CSMAQIQLCPPPPQIPNSHN*M#TTTLN*YR.D |
| N822  | P08603  | R.WDPEVN*CSMAQIQLCPPPPQIPNSHN*M#TTTLN*YR.D |
| N103  | P10909  | K.ELPGVCN*ETMM#ALWEECKPCLK.Q               |
| N103  | P10909  | K.LKELPGVCN*ETMMALWEECKPCLK.Q              |
| N103  | P10909  | K.ELPGVCN*ETMMALWEECKPCLK.Q                |
| N354  | P10909  | K.MLN*TSSLLEQLN*EQFNWVSR.L                 |
| N354  | P10909  | K.M#LN*TSSLLEQLNEQFNWVSR.L                 |
| N354  | P10909  | K.MLN*TSSLLEQLNEQFNWVSR.L                  |
| N86   | P10909  | K.EDALN*ETR.E                              |
| N291  | P10909  | R.HN*STGCLR.M                              |
| N86   | P10909  | K.KKEDALN*ETR.E                            |
| N86   | P10909  | K.KEDALN*ETR.E                             |
| N374  | P10909  | R.LAN*LTQGEDQYYLR.V                        |
| N374  | P10909  | R.LAN*LTQ*GEDQYYLR.V                       |
| N103  | P10909  | K.LKELPGVCN*ETMM#ALWEECKPCLK.Q             |
| N1043 | O75882  | K.M#PSQAPTGN*FYPQ*PLLN*SSMCLEDSR.Y         |
| N1043 | O75882  | K.MPSQAPTGNFYPQPLLN*SSMCLEDSR.Y            |
| N1073 | O75882  | K.CIN*QSICEK.C                             |
| N416  | O75882  | K.IDSTGN*VTNELR.V                          |
| N264  | O75882  | K.ISN*SSDTECECESENWK.G                     |
| N914  | O75882  | K.AATCINPLN*GSVCERPAN*HSAK.Q               |
| N923  | O75882  | K.AATCINPLN*GSVCERPAN*HSAK.Q               |
| N416  | O75882  | K.IDSTGN*VTN*ELR.V                         |
| N731  | O75882  | R.N*HSCSEGQISIFR.Y                         |
| N1054 | O75882  | R.YN*WSFIHCPACQCN*GHSK.C                   |
| N428  | O75882  | R.VFHIHN*ESWVLLTPK.A                       |
| N65   | P05090  | R.CIQAN*YSLM#ENGK.I                        |
| N65   | P05090  | R.CIQAN*YSLM#EN*GK.I                       |
| N65   | P05090  | R.CIQ*AN*YSLM#EN*GK.I                      |
| N65   | P05090  | R.CIQAN*YSLMENGK.I                         |
| N65   | P05090  | R.CIQAN*YSLMEN*GK.I                        |
| N98   | P05090  | R.ADGTVNQ*IEGEATPVN*LTEPAK.L               |
| N98   | P05090  | R.ADGTVNQIEGEATPVN*LTEPAK.L                |
| N98   | P05090  | R.ADGTVNQ*IEGEATPVN*LTEPAKLEVK.F           |
| N98   | P05090  | R.ADGTVNQIEGEATPVN*LTEPAKLEVK.F            |
| N453  | P02790  | K.ALPQ*PQN*VTSLLGCTH.-                     |
| N240  | P02790  | R.N*GTGHGN*STHHGPEYM#R.C                   |
| N246  | P02790  | R.N*GTGHGN*STHHGPEYM#R.C                   |
| N240  | P02790  | R.N*GTGHGN*STHHGPEYMR.C                    |
| N246  | P02790  | R.N*GTGHGN*STHHGPEYMR.C                    |

| Site | Protein | Modified Sequence                        |
|------|---------|------------------------------------------|
| N64  | P02790  | R.CSDGWSFDATTLDDN*GTM#LFFK.G             |
| N64  | P02790  | R.CSDGWSFDATTLDDN*GTMLFFK.G              |
| N187 | P02790  | R.SWPAVGN*CSSALR.W                       |
| N453 | P02790  | K.ALPQPQN*VTSLLGCTH.-                    |
| N271 | P01009  | K.YLGN*ATAIFFLPDEGK.L                    |
| N107 | P01009  | K.ADTHDEILEGLN*FN*LTEIPEAQIHEGFQ*ELLR.T  |
| N107 | P01009  | K.ADTHDEILEGLN*FN*LTEIPEAQIHEGFQELLR.T   |
| N107 | P01009  | K.ADTHDEILEGLN*FN*LTEIPEAQ*IHEGFQELLR.T  |
| N107 | P01009  | K.ADTHDEILEGLN*FN*LTEIPEAQIHEGFQELLR.T   |
| N271 | P01009  | K.YLGN*ATAIFFLPDEGK.LQHLENELTHDIITK.F    |
| N70  | P01009  | R.QLAHQSN*STNIFFSPVSIATAFAM#LSLGTK.A     |
| N70  | P01009  | R.QLAHQSN*STNIFFSPVSIATAFAMLSLGTK.A      |
| N183 | P02749  | R.DTAVFECLPQHAMFGN*DTITCTTHGN*WTKLPECR.E |
| N193 | P02749  | R.DTAVFECLPQHAMFGN*DTITCTTHGN*WTKLPECR.E |
| N183 | P02749  | R.DTAVFECLPQ*HAMFGN*DTITCTTHGN*WTK.L     |
| N193 | P02749  | R.DTAVFECLPQ*HAMFGN*DTITCTTHGN*WTK.L     |
| N162 | P02749  | R.VYKPSAGN*NSLYR.D                       |
| N162 | P02749  | R.VYKPSAGN*N*SLYR.D                      |
| N253 | P02749  | K.LGN*WSAM#PSCK.A                        |
| N253 | P02749  | K.LGN*WSAMPSC.A                          |
| N183 | P02749  | R.DTAVFECLPQHAM#FGN*DTITCTTHGN*WTK.L     |
| N193 | P02749  | R.DTAVFECLPQHAM#FGN*DTITCTTHGN*WTK.L     |
| N183 | P02749  | R.DTAVFECLPQ*HAM#FGN*DTITCTTHGN*WTK.L    |
| N193 | P02749  | R.DTAVFECLPQ*HAM#FGN*DTITCTTHGN*WTK.L    |
| N193 | P02749  | R.DTAVFECLPQ*HAMFGNDTITCTTHGN*WTK.L      |
| N183 | P02749  | R.DTAVFECLPQHAMFGN*DTITCTTHGN*WTK.L      |
| N193 | P02749  | R.DTAVFECLPQHAMFGN*DTITCTTHGN*WTK.L      |
| N340 | P01876  | R.LAGKPTHVN*VSVVMAEVDGTCY.-              |
| N144 | P01876  | R.LSLHRPALEDLLGSEAN*LTCTLTGLR.D          |
| N340 | P01876  | R.LAGKPTHVN*VSVVM#AEVDGTCY.-             |
| N358 | P00450  | K.AGLQAFFQVQECN*K.S                      |
| N138 | P00450  | K.EHEGAIYPD*TTDFQR.A                     |
| N762 | P00450  | K.ELHHLQEQN*VSNAFLDK.G                   |
| N762 | P00450  | K.ELHHLQEQN*VSN*AFLDK.G                  |
| N397 | P00450  | K.EN*LTAPGSDSAVFFEQGTTR.I                |
| N762 | P00450  | K.ELHHLQEQN*VSNAFLDKGEFYIGSK.Y           |
| N176 | P02765  | K.AALAAFNAQNN*GSNFQLEEISR.A              |
| N176 | P02765  | K.AALAAFNAQN*N*GSNFQLEEISR.A             |
| N156 | P02765  | R.KVCQDCPLLAPLN*DTR.V                    |
| N156 | P02765  | R.KVCQ*DCPLLAPLN*DTR.V                   |
| N156 | P02765  | K.VCQDCPLLAPLN*DTR.V                     |

| Site  | Protein | Modified Sequence                               |
|-------|---------|-------------------------------------------------|
| N125  | P04196  | R.VIDFN*CTTSSVSSALANTK.D                        |
| N125  | P04196  | R.VIDFN*CTTSSVSSALAN*TK.D                       |
| N344  | P04196  | R.HSHNN*NSSDLHPHK.H                             |
| N345  | P04196  | R.HSHNNN*SSDLHPHK.H                             |
| N344  | P04196  | R.HSHNN*N*SSDLHPHK.H                            |
| N285  | P19827  | K.ICDLLVANN*HFAHFFAPQN*LTNMNK.N                 |
| N285  | P19827  | K.ICDLLVANNHFAHFFAPQN*LTNMNK.N                  |
| N285  | P19827  | R.DKICDLLVANN*HFAHFFAPQN*LTNMNK.N               |
| N285  | P19827  | R.DKICDLLVAN*NHFAHFFAPQN*LTNM#NK.N              |
| N285  | P19827  | R.DKICDLLVANNHFAHFFAPQN*LTNMNK.N                |
| N285  | P19827  | R.DKICDLLVAN*N*HFAHFFAPQN*LTNMN*K.N             |
| N577  | Q14624  | R.NQALN*LSLAYSFVTPLTSMVVTKPDDQEQSQVAEKPMEGESR.N |
| N81   | Q14624  | K.AFITN*FSMIIDGM#TYPGIK.E                       |
| N517  | Q14624  | K.LPTQN*ITFQTESSVAEQEAEFQSPK.Y                  |
| N81   | Q14624  | K.AFITN*FSMIIDGMTYPGIK.E                        |
| N517  | Q14624  | K.LPTQN*ITFQ*TESSVAEQ*EAEFQSPK.Y                |
| N517  | Q14624  | K.LPTQN*ITFQTESSVAEQ*EAEFQSPK.Y                 |
| N2790 | P04275  | R.TEPMQVALHCTN*GSVVYHEVLNAMECK.C                |
| N211  | P04275  | R.ASPSSSCN*ISSGEM#QK.G                          |
| N211  | P04275  | R.ASPSSSCN*ISSGEMQK.G                           |
| N2635 | P04275  | R.KTTCNPCPLGYKEEN*N*TGECCGR.C                   |
| N2223 | P04275  | R.HCDGN*VSSCGDHPSEGFCPPDK.V                     |
| N2635 | P04275  | K.TTCNPCPLGYKEEN*NTGECCGR.C                     |
| N1515 | P04275  | K.IGEADFN*R.S                                   |
| N666  | P04275  | K.GQVYLQCGTPCN*LTCSR.S                          |
| N2585 | P04275  | R.M#EACMLN*GTVIGPGK.T                           |
| N86   | P04004  | K.NN*ATVHEQ*VGGPSLTSDLQAQSK.G                   |
| N86   | P04004  | K.NN*ATVHEQVGGPSLTSDLQAQSK.G                    |
| N86   | P04004  | K.N*N*ATVHEQVGGPSLTSDLQAQSK.G                   |
| N86   | P04004  | K.NN*ATVHEQ*VGGPSLTSDLQ*AQSK.G                  |
| N224  | P01008  | K.WVSN*KTEGR.I                                  |
| N128  | P01008  | K.LGACN*DTLQQLM#EVFK.F                          |
| N128  | P01008  | K.LGACN*DTLQQLMEVFK.F                           |
| N187  | P01008  | K.SLTFN*ETYQDISELVYGAK.L                        |
| N128  | P01008  | K.LGACN*DTLQQLM#EVFKFDTISEK.T                   |
| N128  | P01008  | K.LGACN*DTLQQLMEVFKFDTISEK.T                    |
| N128  | P01008  | K.LGACN*DTLQQ*LMEVFK.F                          |
| N1007 | P02751  | K.LDAPTNLQFVN*ETDSTVLVR.W                       |
| N528  | P02751  | R.DQCIVDDITYNVN*DTFHK.R                         |
| N542  | P02751  | R.HEEGHMLN*CTCFGQGR.G                           |
| N430  | P02751  | R.GGNSNGALCHFPFLYNNHN*YTDCTSEGR.R               |

| Site  | Protein | Modified Sequence                           |
|-------|---------|---------------------------------------------|
| N430  | P02751  | R.GGN*SNGALCHFPFLYNNHN*YTDCTSEGR.R          |
| N430  | P02751  | R.GGN*SNGALCHFPFLYNN*HN*YTDCTSEGR.R         |
| N430  | P02751  | R.GGNSNGALCHFPFLYN*N*HN*YTDCTSEGR.R         |
| N221  | P04003  | R.FSLLGHASISCTVEN*ETIGVWRPSPPTCEK.I         |
| N506  | P04003  | R.LSVDKDQYVEPEN*VTIQCDSGYGVVGPQSITCSGNR.T   |
| N506  | P04003  | R.LSVDKDQYVEPEN*VTIQCDSGYGVVGPQSITCSGN*R.T  |
| N528  | P04003  | R.LSVDKDQYVEPEN*VTIQCDSGYGVVGPQSITCSGN*R.T  |
| N528  | P04003  | R.LSVDKDQYVEPENVTIQ*CDSGYGVVGPQSITCSGN*R.T  |
| N506  | P04003  | R.LSVDKDQYVEPEN*VTIQ*CDSGYGVVGPQSITCSGN*R.T |
| N528  | P04003  | R.LSVDKDQYVEPEN*VTIQ*CDSGYGVVGPQSITCSGN*R.T |
| N506  | P04003  | K.DQYVEPEN*VTIQCDSGYGVVGPQSITCSGN*R.T       |
| N528  | P04003  | K.DQYVEPEN*VTIQCDSGYGVVGPQSITCSGN*R.T       |
| N143  | P00734  | R.YPHKPEIN*STTHPGADLQENFCR.N                |
| N143  | P00734  | R.SRYPHKPEIN*STTHPGADLQ*EN*FCR.N            |
| N143  | P00734  | R.SRYPHKPEIN*STTHPGADLQENFCR.N              |
| N143  | P00734  | R.YPHKPEIN*STTHPGADLQEN*FCR.N               |
| N205  | P00734  | R.SEGSSVN*LSPPLEQCVPDR.G                    |
| N416  | P00734  | K.N*FTENDLLVR.I                             |
| N352  | P05155  | K.AKVGQLQLSHN*LSLVILVPQNLK.H                |
| N352  | P05155  | K.VGQLQLSHN*LSLVILVPQNLK.H                  |
| N253  | P05155  | R.VLSN*NSDANLELINTWVAK.N                    |
| N25   | P05155  | R.ASSNP*ATSSSSQDPESLQDR.G                   |
| N238  | P05155  | R.DTFVN*ASR.T                               |
| N1391 | P0C0L4  | K.N*TTCQDLQIEVTVK.G                         |
| N226  | P0C0L4  | R.FSDGLESN*SSTQFEVK.K                       |
| N1328 | P0C0L4  | R.GLN*VTLSSSTGR.N                           |
| N1328 | P0C0L4  | R.GLN*VTLSSSTGRN*GFK.S                      |
| N93   | P02763  | R.QDQCIYN*TTYLNVQR.E                        |
| N72   | P02763  | K.SVQEIQATFFYFTPN*KTEDTIFLR.E               |
| N93   | P02763  | R.QDQ*CIYN*TTYLNVQR.E                       |
| N106  | P01011  | K.FN*LTETSEAEIHQSFQHLLR.T                   |
| N127  | P01011  | R.TLN*QSSDELQLSMGNAMFVK.E                   |
| N93   | P01011  | K.NVIFSPLSISTALAFSLGAHN*TTLTEILK.G          |
| N127  | P01011  | R.TLN*Q*SSDELQLSMGNAMFVK.E                  |
| N112  | P06681  | R.LGSYPVGGN*VSFECEDGFILR.G                  |
| N621  | P06681  | K.QSVPAHFVALN*GSK.L                         |
| N467  | P06681  | K.LTDTICGVGN*MSAN*ASDQER.T                  |
| N471  | P06681  | K.LTDTICGVGN*MSAN*ASDQER.T                  |
| N651  | P06681  | K.TM#FPN*LTDVR.E                            |
| N128  | P25311  | R.FGCEIENN*R.S                              |
| N128  | P25311  | R.FGCEIEN*N*R.S                             |

| Site | Protein | Modified Sequence                     |
|------|---------|---------------------------------------|
| N109 | P25311  | K.DIVEYYN*DSN*GSHVLQGR.F              |
| N112 | P25311  | K.DIVEYYN*DSN*GSHVLQGR.F              |
| N112 | P25311  | K.DIVEYYNDSN*GSHVLQGR.F               |
| N109 | P25311  | K.DIVEYYN*DSNGSHVLQGR.F               |
| N85  | P01024  | K.TVLTPATNHM#GN*VTFTIPANR.E           |
| N85  | P01024  | K.TVLTPATN*HM#GN*VTFTIPANR.E          |
| N85  | P01024  | K.TVLTPATNHMGN*VTFTIPANR.E            |
| N85  | P01024  | K.TVLTPATN*HMGN*VTFTIPANR.E           |
| N324 | P27169  | K.VTQVYAEN*GTVLQGSTVASVYK.G           |
| N253 | P27169  | K.HAN*WTLTPLK.S                       |
| N324 | P27169  | K.VTQVYAEN*GTVLQ*GSTVASVYK.G          |
| N453 | P03952  | R.IYSGILN*LSDITK.D                    |
| N308 | P03952  | K.IYPGVDFGGEELN*VTFVK.G               |
| N396 | P03952  | R.IVGGTN*SSWGEWPWQVSLQVK.L            |
| N127 | P03952  | R.GVNFN*VSK.V                         |
| N494 | P03952  | K.LQAPLN*YTEFQKPICLPSK.G              |
| N88  | P51884  | K.AFEN*VTDLQWLILDHNLENSK.I            |
| N127 | P51884  | K.LHINHNN*LTESVGPLPK.S                |
| N127 | P51884  | K.KLHINHNN*LTESVGPLPK.S               |
| N125 | Q08380  | R.DAGVVCTN*ETR.S                      |
| N551 | Q08380  | K.AAIPSALDTN*SSK.S                    |
| N398 | Q08380  | K.GLN*LTEDTYKPR.I                     |
| N192 | Q08380  | K.EPGSN*VTMSVDAECVPMVR.D              |
| N69  | Q08380  | R.ALGFEN*ATQALGR.A                    |
| N580 | Q08380  | R.TVIRPFYLTN*SSGVD.-                  |
| N369 | P08185  | K.AVLQLNEEGVDTAGSTGVTLN*LTSKPIILR.F   |
| N96  | P08185  | R.AQLLQGLGFN*LTER.S                   |
| N369 | P08185  | K.AVLQ*LN*EEGVDTAGSTGVTLN*LTSKPIILR.F |
| N285 | P00751  | R.KIVLDPSGSMNIYLVLDGSDSIGASN*FTGAK.K  |
| N285 | P00751  | K.IVLDPSGSMNIYLVLDGSDSIGASN*FTGAK.K   |
| N285 | P00751  | K.IVLDPSGSMN*IYLVLDGSDSIGASN*FTGAK.K  |
| N367 | Q96PD5  | R.LEPVHLQLQCMSQEQLAQAAN*ATK.E         |
| N485 | Q96PD5  | R.GFGVAIVGN*YTAALPTEAALR.T            |
| N77  | Q96PD5  | R.LYHFLLGAWSLN*ATELDPCPLSPELLGLTK.E   |
| N580 | Q06033  | K.N*AHGEEKEN*LTAR.A                   |
| N580 | Q06033  | R.KNAHGEEKEN*LTAR.A                   |
| N580 | Q06033  | K.NAHGEEKEN*LTAR.A                    |
| N146 | P02745  | R.NPPMGGNVVIFDTVITNQEEPYQN*HSGR.F     |
| N146 | P02745  | R.NPPMGGN*VVIFDTVITNQEEPYQN*HSGR.F    |
| N146 | P02745  | R.RNPPM#GGNVVIFDTVITNQEEPYQN*HSGR.F   |
| N146 | P02745  | R.NPPM#GGNVVIFDTVITNQEEPYQN*HSGR.F    |

| Site  | Protein | Modified Sequence                                  |
|-------|---------|----------------------------------------------------|
| N146  | P02745  | R.RNPPMGGNVVIFDVTITNQEEPYQN*HSGR.F                 |
| N75   | Q9Y6R7  | R.LLISSLSESPASVSILSQADN*TSK.K                      |
| N1830 | Q9Y6R7  | R.NPNNDQVFPN*GTLAPSIPIWGGSWR.A                     |
| N5186 | Q9Y6R7  | R.YLPVN*SSLTSDCSER.C                               |
| N75   | Q9Y6R7  | R.LLISSLSESPASVSILSQADN*TSKK.V                     |
| N174  | P49908  | K.CGN*CSLTTLKDEDFCKR.V                             |
| N174  | P49908  | K.CGN*CSLTTLKDEDFCKR.R                             |
| N83   | P49908  | K.EGYSN*ISYIVVNHQGISSR.L                           |
| N83   | P49908  | K.EGYSN*ISYIVVN*HQGISSR.L                          |
| N321  | P80108  | R.NIN*YTER.G                                       |
| N659  | P80108  | K.LGTSLSGGHVLMLN*GTLK.Q                            |
| N307  | P80108  | R.N*LTSLTESVDR.N                                   |
| N369  | P06276  | K.DN*NSIITR.K                                      |
| N284  | P06276  | R.EN*ETEIIK.C                                      |
| N85   | P06276  | K.WSDIWN*ATK.Y                                     |
| N509  | P06276  | K.YGNPN*ETQNN*STSWPVFK.S                           |
| N514  | P06276  | K.YGNPN*ETQNN*STSWPVFK.S                           |
| N119  | P43251  | K.DVQIIVFPEDGIHGFN*FTR.T                           |
| N402  | P43251  | K.WNVNAPPTFHSEMMYDN*FTLVPVWGK.E                    |
| N349  | P43251  | K.NPVGLIGAEN*ATGETDPSHSK.F                         |
| N203  | P43251  | R.YQFNTNVVFSNN*GTLVDR.Y                            |
| N363  | P04217  | R.FQ*SPAGTEALFELHN*ISVADSAN*YSCVYVDLKPPFGGSAPSER.L |
| N371  | P04217  | R.FQ*SPAGTEALFELHN*ISVADSAN*YSCVYVDLKPPFGGSAPSER.L |
| N363  | P04217  | R.FQSPAGTEALFELHN*ISVADSAN*YSCVYVDLKPPFGGSAPSER.L  |
| N371  | P04217  | R.FQSPAGTEALFELHN*ISVADSAN*YSCVYVDLKPPFGGSAPSER.L  |
| N98   | P20851  | R.LGHCPDPVLVNGEFSSSGPVN*VSDK.I                     |
| N98   | P20851  | R.LGHCPDPVLVN*GEFSSSGPVN*VSDK.I                    |
| N325  | P02750  | K.M#FSQN*DTR.C                                     |
| N269  | P02750  | R.QLDMLDLN*NSLASVPEGLWASLGQPNWDMR.D                |
| N325  | P02750  | K.MFSQN*DTR.C                                      |
| N135  | O95445  | K.TELFSSSCPGGIM#LN*ETGQGYQR.F                      |
| N135  | O95445  | K.TELFSSSCPGGIMLN*ETGQGYQR.F                       |
| N165  | P05543  | K.TLYETEVFSTDFSN*ISAAK.Q                           |
| N36   | P05543  | K.VTACHSSQPN*ATLYK.M                               |
| N406  | P09871  | R.YTCEEPYYMENGGGGEYHCAGN*GSWVN*EVLGPELPK.C         |
| N174  | P09871  | K.N*CGVN*CSGDVFTALIGEIASPN*YPKYPEN*SR.C            |
| N174  | P09871  | K.NCGVN*CSGDVFTALIGEIASPN*YPKYPEN*SR.C             |
| N295  | Q9UK55  | K.LPYQGN*ATMLVVLMEK.M                              |
| N180  | Q9UK55  | K.ETFFN*LSKR.Y                                     |
| N180  | Q9UK55  | K.ETFFN*LSK.R                                      |
| N170  | P01019  | R.LQAILGVPWKDKN*CTSR.L                             |

| Site | Protein | Modified Sequence                       |
|------|---------|-----------------------------------------|
| N47  | P01019  | R.VYIHPFHLVIHN*ESTCEQLAK.A              |
| N118 | P02766  | K.ALGISPFHEHADEVVFTAN*DSGPR.R           |
| N359 | P22792  | K.LYLGSNNTALHPALFQ*N*LSK.L              |
| N348 | P22792  | K.LYLGSNN*LTALHPALFQN*LSK.L             |
| N359 | P22792  | K.LYLGSNN*LTALHPALFQN*LSK.L             |
| N74  | P22792  | R.AFGSNPN*LTK.V                         |
| N63  | P55056  | R.M#KELLETVVN*R.T                       |
| N63  | P55056  | K.ELLETVVN*R.T                          |
| N63  | P55056  | R.MKELLETVVN*R.T                        |
| N142 | Q12913  | K.SN*DTAASEYK.Y                         |
| N413 | Q12913  | K.IHVAGETDSSNLN*VSEPR.A                 |
| N231 | Q12913  | K.AALSWSNGN*GTASCR.V                    |
| N104 | P14151  | K.IGGIWTWVGTN*K.S                       |
| N60  | P14151  | R.FCRDN*YTDLVAIQNK.A                    |
| N60  | P14151  | R.DN*YTDLVAIQNK.A                       |
| N70  | P05156  | K.N*GTAVCATN*R.R                        |
| N103 | P05156  | K.FLNN*GTCTAEGK.F                       |
| N177 | P05156  | K.LSDLSIN*STECLHVHCR.G                  |
| N108 | P29622  | R.SQILEGLGFN*LTELSESDVHR.G              |
| N157 | P29622  | K.FLN*DTMAVYEAK.L                       |
| N116 | P17936  | R.GLCVN*ASAVSR.L                        |
| N136 | P17936  | R.AYLLPAPPAPGN*ASESEEDR.S               |
| N49  | P05546  | K.GGETAQ*SADPQWEQLN*N*KN*LSMPLLPADFHK.E |
| N49  | P05546  | K.GGETAQSDPQWEQ*LNNKN*LSMPLLPADFHK.E    |
| N49  | P05546  | K.N*LSMPLLPADFHK.E                      |
| N294 | P01042  | K.LNAENN*ATFYFK.I                       |
| N205 | P01042  | R.ITYSIVQTN*CSK.E                       |
| N118 | P19823  | K.GAFISN*FSMTVDGK.T                     |
| N118 | P19823  | K.GAFISN*FSM#TVDGK.T                    |
| N180 | P01857  | R.EEQYN*STYR.V                          |
| N180 | P01857  | R.EEQ*YN*STYR.V                         |
| N432 | P02787  | K.CGLVPVLAENYN*K.S                      |
| N402 | P43652  | R.YAEDKFN*ETTEK.S                       |
| N33  | P43652  | R.DIENFN*STQK.F                         |
| N491 | P03951  | K.LETTVN*YTDSQRPICLPSKGDR.N             |
| N491 | P03951  | K.LETTVN*YTDSQRPICLPSK.G                |
| N143 | P55058  | K.VSN*VSCQASVSR.M                       |
| N64  | P55058  | K.EGHFYYN*ISEVK.V                       |
| N162 | P05160  | R.KEHETCLAPELYN*GN*YSTTQK.T             |
| N202 | P10643  | K.INNDFNYEFYN*STWSYVK.H                 |
| N754 | P10643  | R.N*YTLTGR.D                            |



| Site  | Protein | Modified Sequence                       |
|-------|---------|-----------------------------------------|
| N53   | Q9Y5Y7  | K.KANQQLN*FTEAK.E                       |
| N53   | Q9Y5Y7  | K.ANQQLN*FTEAK.E                        |
| N184  | P09172  | R.SLEAIN*GSGLQMGLQR.V                   |
| N514  | P00736  | K.EHEAQSN*ASLDVFLGHTNVEELMK.L           |
| N221  | P00736  | R.CN*YSIR.V                             |
| N169  | Q14515  | R.N*YSHHQLNR.S                          |
| N412  | Q14515  | K.KAEN*SSNEETSSEGNMR.V                  |
| N816  | Q13201  | R.DEKLN*QSNFQK.M                        |
| N507  | Q13201  | R.SILYYESLN*K.T                         |
| N830  | Q9Y4L1  | R.LSALDNLLN*HSSMFLK.G                   |
| N862  | Q9Y4L1  | K.VIN*ETWAWK.N                          |
| N78   | P41222  | K.SVVAPATDGGLN*LTSTFLR.K                |
| N98   | P23142  | R.CATPHGDN*ASLEATFVK.R                  |
| N153  | P13598  | R.GN*ETLHYETFGK.A                       |
| N47   | P13598  | K.GSLEVN*CSTTCN*Q*PEVGGLETSLDK.I        |
| N71   | P01591  | R.EN*ISDPTSPLR.T                        |
| N71   | P01591  | R.IIVPLN*NREN*ISDPTSPLR.T               |
| N552  | Q76LX8  | R.CQVCGGDN*STCSPR.K                     |
| N707  | Q76LX8  | R.WVN*YSCLDQAR.K                        |
| N234  | P15144  | K.AEFN*ITLIHPK.D                        |
| N265  | P15144  | K.GPSTPLPEDPNWN*VTEFHHTPK.M             |
| N415  | P02748  | R.AVN*ITSENLIDDVVSLIR.G                 |
| N83   | P01833  | R.AN*LTNFPENGTFFVN*IAQLSQDDSGR.Y        |
| N469  | P01833  | K.VPGN*VTAVLGETLK.V                     |
| N267  | P05362  | R.LNPTVITYGN*DSFSAK.A                   |
| N145  | P05362  | R.AN*LTVVLLR.G                          |
| N73   | Q96IY4  | K.KQVHFFVN*ASDVDNVK.A                   |
| N73   | Q96IY4  | K.QVHFFVN*ASDVDNVK.A                    |
| N396  | P04278  | R.SHEIWITHSCPQSPGN*GTDASH.-             |
| N380  | P04278  | R.LDVDQALN*R.S                          |
| N1067 | P07996  | K.VVN*STTGPEHLR.N                       |
| N360  | P07996  | K.KVSCPIMPCSN*ATVPDGECCPR.C             |
| N437  | P07357  | R.GGSSGWSGGLAQN*R.S                     |
| N437  | P07357  | R.GGSSGWSGGLAQ*N*R.S                    |
| N37   | P07359  | R.N*LTALPPDLPK.D                        |
| N189  | O75636  | R.VELEDNFN*GN*R.T                       |
| N299  | Q01459  | K.QIN*SSISGNLWDKDQR.A                   |
| N444  | Q16610  | K.HIPGLIHN*MTAR.C                       |
| N182  | Q14126  | K.IN*ATDADEPNTLNSK.I                    |
| N374  | Q92496  | K.CKPGYATADGN*SSGSITCLQ*N*GWSAQ*PICIK.F |
| N263  | P07339  | K.GSLSYLN*VTR.K                         |

| Site  | Protein | Modified Sequence                        |
|-------|---------|------------------------------------------|
| N130  | O00391  | K.N*GSGAVFPVAGADVQ*TLR.E                 |
| N257  | P13473  | K.VASVININPN*TTHSTGSCR.S                 |
| N290  | Q04756  | R.CFLGN*GTGYR.G                          |
| N522  | O14786  | K.IGYSNN*GSDWK.M                         |
| N156  | P02788  | R.TAGWN*VPIGTLRPFLN*WTGPPEPIEAAVAR.F     |
| N103  | Q99784  | K.VQN*MSQSIEVLDRR.T                      |
| N108  | Q02985  | K.FVQGN*STEVACHPGYGLPK.A                 |
| N411  | P16109  | R.AFQYDTN*CSFR.C                         |
| N275  | P07333  | K.VLTLN*LDQVDFQ*HAGN*YSCVASNVQ*GK.H      |
| N308  | P00747  | R.GNVAVTVSGHTCQHWSAQ*TPHTHN*R.T          |
| N102  | O75144  | R.LFN*VTPQDEQK.F                         |
| N85   | P80188  | K.SYN*VTSVLFR.K                          |
| N530  | P55290  | R.YSVYKDPAGWLNINPIN*GTVDTTAVLDR.E        |
| N619  | Q2TV78  | K.GTGN*DTVLNVALLNVISNQECNIK.H            |
| N353  | O95497  | K.LTGVAGN*YTVCQK.D                       |
| N509  | P12821  | R.N*ETHFDAGAK.F                          |
| N1240 | Q8IVL1  | R.SSTSSIDSN*ISSK.S                       |
| N365  | P08195  | K.DASSFLAEWQN*ITK.G                      |
| N31   | Q9H079  | K.ISN*FTN*KN*MK.E                        |
| N88   | Q9UJJ9  | K.YEFCPFHN*VTQHEQTFR.W                   |
| N442  | P33151  | R.EVYPWYN*LTVEAK.E                       |
| N282  | P08571  | R.CMWSSALNSLN*LSFAGLEQVPK.G              |
| N247  | Q6YHK3  | K.HLN*GTITAK.Y                           |
| N433  | P00748  | R.N*HSCEPCQTLAVR.S                       |
| N110  | Q8IU88  | R.STNHEPSEMSN*R.T                        |
| N821  | P12259  | K.NSVLN*SSTAETHSSPYSEDPIEDPLQPDVTGIR.L   |
| N296  | Q9NZP8  | R.KN*QSVN*VFLGHTAIDEMLK.L                |
| N243  | P07358  | K.EYESYSDFERN*VTEK.M                     |
| N729  | Q07954  | R.IETILLN*GTDR.K                         |
| N285  | P36955  | K.VTQN*LTLIEESLTSEFIHDIDR.E              |
| N459  | P13591  | R.DGQLLPSSN*YSNIK.I                      |
| N92   | P0DP01  | R.N*TSISTAYMELSSLR.S                     |
| N136  | P54289  | K.DDLDPKKN*DSEPGSQR.I                    |
| N53   | P01033  | K.FVGTPEVN*QTTLYQR.Y                     |
| N368  | P35858  | K.AGAFGLTNVAVMN*LSGNCLR.N                |
| Site  |         | Modified Sequence                        |
| N107  | P01009  | K.ADTHDEILEGLN*FN*LTEIPEAQ*IHEGFQ*ELLR.T |
| N107  | P01009  | K.ADTHDEILEGLN*FN*LTEIPEAQ*IHEGFQ*ELLR.T |
| N107  | P01009  | K.ADTHDEILEGLN*FN*LTEIPEAQ*IHEGFQ*ELLR.T |
| N70   | P01009  | R.QLAHQSN*STN*IFFSPVSIATAFAM#LSLGTK.A    |
| N2560 | P04114  | K.N*LTDFAEQYSIQDWAK.R                    |

| Site  | Protein | Modified Sequence                            |
|-------|---------|----------------------------------------------|
| N3336 | P04114  | K.ELCTISHIFIPAM#GN*ITYDFSFK.S                |
| N185  | P04114  | K.Q*VLFLDVTYGN*CSTHFTVK.T                    |
| N3358 | P04114  | K.SSVITLNTNAELFN*QSDIVAHLLSSSSSSVIDALQYK.L   |
| N2779 | P04114  | K.IQSPLFTLDAN*ADIGN*GTTSANEAGIAASITAK.G      |
| N396  | P01023  | R.GN*EAN*YYSN*ATTDEHGLVQFSIN*TTN*VMGTSLTVR.V |
| N410  | P01023  | R.GN*EAN*YYSN*ATTDEHGLVQFSIN*TTN*VMGTSLTVR.V |
| N869  | P01023  | K.SLGN*VN*FTVSAEALLESQ*ELCGTEVPSVPEHGRK.D    |
| N396  | P01023  | R.GNEAN*YYSN*ATTDEHGLVQFSIN*TTN*VMGTSLTVR.V  |
| N410  | P01023  | R.GNEAN*YYSN*ATTDEHGLVQFSIN*TTN*VMGTSLTVR.V  |
| N396  | P01023  | R.GN*EANYYSN*ATTDEHGLVQFSIN*TTN*VMGTSLTVR.V  |
| N410  | P01023  | R.GN*EANYYSN*ATTDEHGLVQFSIN*TTN*VMGTSLTVR.V  |
| N1424 | P01023  | R.TEVSSN*HVLIYLDKVSQ*Q*TLNFLFTVLQ*DVPVR.D    |
| N128  | P01008  | K.LGACN*DTLQQ*LM#EVFKFDTISEK.T               |
| N128  | P01008  | K.LGACN*DTLQ*QLMEVFK.F                       |
| N187  | P01008  | K.SLTFN*ETYQ*DISELVYGAK.L                    |
| N224  | P01008  | R.AAINKWVSN*KTEGR.I                          |
| N85   | P01024  | K.TVLTIPATN*HMGN*VTFTIPAN*R.E                |
| N180  | P01857  | K.TKPREEQYN*STYR.V                           |
| N209  | P01871  | R.GLTFQ*QN*ASSMCPDQ*DTAIR.V                  |
| N46   | P01871  | K.N*NSDISSTR.G                               |
| N279  | P01871  | K.THTNISESHPN*ATFSAVGEASICEDDWN*SGER.F       |
| N630  | P02787  | R.QQHLFGSN*VTDCSGNFCLFR.S                    |
| N630  | P02787  | R.QQHLFGSN*VTDCSGN*FCLFR.S                   |
| N432  | P02787  | K.CGLVPVLAEN*YN*K.S                          |
| N1391 | P0C0L4  | K.N*TTCQDLQ*IEVTVK.G                         |
| N822  | P08603  | R.WDPEVNCSM#AQIQLCPPPQIPNSHN*MTTTLN*YR.D     |
| N802  | P08603  | R.WDPEVN*CSMAQ*IQLCPPPQIPNSHN#TTTLN*YR.D     |
| N822  | P08603  | R.WDPEVNCSMAQIQLCPPPQIPN*SHN*#TTTLN*YR.D     |
| N1095 | P08603  | R.SPYEMFGDEEVM#CLN*GN*WTEPPQCK.D             |
| N802  | P08603  | R.WDPEVN*CSM#AQIQLCPPPQIPNSHN*MTTTLN*YR.D    |
| N822  | P08603  | R.WDPEVN*CSM#AQIQLCPPPQIPNSHN*MTTTLN*YR.D    |
| N1095 | P08603  | R.SPYEMFGDEEVM#CLNGN*WTEPPQCK.D              |
| N802  | P08603  | R.WDPEVN*CSMAQ*IQ*LCPPPQ*IPN*SHNMTTTLN*YR.D  |
| N882  | P08603  | K.IPCSQ*PPQ*IEHGTIN*SSR.S                    |
| N882  | P08603  | K.IPCSQ*PPQIEHGTIN*SSR.S                     |
| N542  | P02751  | K.RHEEGHM#LN*CTCFGQGR.G                      |
| N542  | P02751  | R.HEEGHM#LN*CTCFGQGR.G                       |
| N542  | P02751  | K.RHEEGHMLN*CTCFGQGR.G                       |
| N430  | P02751  | R.GGNSNGALCHFPFLYN*NHN*YTDCTSEGR.R           |
| N253  | P05155  | R.VLSN*NSDANLELIN*TWVAK.N                    |
| N352  | P05155  | K.VGQLQ*LSHN*LSLVILVPQNLK.H                  |

| Site  | Protein | Modified Sequence                            |
|-------|---------|----------------------------------------------|
| N69   | P05155  | K.MLFVEPILEVSSLPTTN*STTNSATK.I               |
| N138  | P00450  | K.EHEGAIYPDN*TTDFQ*R.A                       |
| N762  | P00450  | K.ELHHLQEQ*N*VSNAFLDK.G                      |
| N285  | P19827  | K.ICDLLVANNHFAHFFAPQN*LTNM#NK.N              |
| N285  | P19827  | K.ICDLLVANN*HFAHFFAPQ*N*LTNM#NK.N            |
| N285  | P19827  | K.ICDLLVAN*N*HFAHFFAPQN*LTN*M#NK.N           |
| N285  | P19827  | R.DKICDLLVAN*NHFAHFFAPQN*LTNMNK.N            |
| N285  | P19827  | R.DKICDLLVANNHFAHFFAPQ*N*LTNM#NK.N           |
| N285  | P19827  | R.DKICDLLVANNHFAHFFAPQN*LTN*MNK.N            |
| N588  | P19827  | R.AN*LSSQ*ALQ*MSLDYGFVTPLTSMIR.G             |
| N176  | P02765  | K.AALAAFNAQNN*GSN*FQLEEISR.A                 |
| N453  | P02790  | K.ALPQPQ*N*VTSLLGCTH.-                       |
| N240  | P02790  | R.GHGHRN*GTGHGN*STHHGPEYMR.C                 |
| N246  | P02790  | R.GHGHRN*GTGHGN*STHHGPEYMR.C                 |
| N506  | P04003  | R.LSVDKDQ*YVEPEN*VTIQ*CDSGYGVVGPQSITCSGN*R.T |
| N528  | P04003  | R.LSVDKDQ*YVEPEN*VTIQ*CDSGYGVVGPQSITCSGN*R.T |
| N506  | P04003  | R.LSVDKDQYVEPEN*VTIQ*CDSGYGVVGPQ*SITCSGN*R.T |
| N528  | P04003  | R.LSVDKDQYVEPEN*VTIQ*CDSGYGVVGPQ*SITCSGN*R.T |
| N506  | P04003  | R.LSVDKDQ*YVEPEN*VTIQCDSGYGVVGPQ*SITCSGN*R.T |
| N528  | P04003  | R.LSVDKDQ*YVEPEN*VTIQCDSGYGVVGPQ*SITCSGN*R.T |
| N528  | P04003  | R.LSVDKDQ*YVEPENVTIQ*CDSGYGVVGPQSITCSGN*R.T  |
| N528  | P04003  | R.LSVDKDQYVEPENVTIQCDSGYGVVGPQ*SITCSGN*R.T   |
| N528  | P04003  | R.LSVDKDQ*YVEPENVTIQCDSGYGVVGPQSITCSGN*R.T   |
| N506  | P04003  | R.LSVDKDQ*YVEPEN*VTIQCDSGYGVVGPQSITCSGN*R.T  |
| N528  | P04003  | R.LSVDKDQ*YVEPEN*VTIQCDSGYGVVGPQSITCSGN*R.T  |
| N354  | P10909  | K.MLN*TSSLLEQLNEQFN*WVSR.L                   |
| N354  | P10909  | K.MLN*TSSLLEQ*LNEQFNWVSR.L                   |
| N416  | P00734  | R.WVLTAAHCLLYPPWDKN*FTENDLLVR.I              |
| N143  | P00734  | R.SRYPHKPEIN*STTHPGADLQEN*FCR.N              |
| N143  | P00734  | R.YPHKPEIN*STTHPGADLQ*EN*FCR.N               |
| N143  | P00734  | R.SRYPHKPEIN*STTHPGADLQ*ENFCR.N              |
| N143  | P00734  | R.YPHKPEIN*STTHPGADLQ*ENFCR.N                |
| N271  | P01011  | K.YTGN*ASALFILPDQDKMEEVEAMLLPETLK.R          |
| N81   | Q14624  | K.KAFITN*FSMIIDGMTYPGIK.E                    |
| N81   | Q14624  | K.AFITN*FSM#IIDGMTYPGIK.E                    |
| N517  | Q14624  | K.LPTQN*ITFQTESSVAEQEAEFQ*SPK.Y              |
| N1043 | O75882  | K.MPSQ*APTGN*FYPQ*PLLN*SSMCLEDSR.Y           |
| N264  | O75882  | K.ISN*SSDTVECECSEN*WKGEACDIPHCTDNCGFPHR.G    |
| N1054 | O75882  | R.YN*WSFIHCPACQCNGHSC.C                      |
| N383  | O75882  | R.EWLPLN*R.S                                 |
| N1198 | O75882  | R.DLDMFIN*ASK.N                              |

| Site  | Protein | Modified Sequence                             |
|-------|---------|-----------------------------------------------|
| N183  | P02749  | R.DTAVFECLPQ*HAMFGN*DTITCTTHGN*WTKLPECR.E     |
| N193  | P02749  | R.DTAVFECLPQ*HAMFGN*DTITCTTHGN*WTKLPECR.E     |
| N193  | P02749  | R.DTAVFECLPQ*HAMFGNDTITCTTHGN*WTKLPECR.E      |
| N288  | P02774  | K.LCDN*LSTK.N                                 |
| N86   | P04004  | K.NN*ATVHEQVGGPSLTSDLQAQ*SK.G                 |
| N98   | P05090  | R.ADGTVN*QIEGEATPVN*LTEPAK.L                  |
| N65   | P05090  | R.CIQ*AN*YSLMENGK.I                           |
| N109  | P43652  | K.ICAMEGLPQKHN*FSHCCSK.V                      |
| N49   | P05546  | K.GGETAQSADPQWEQLNKN*LSMPLLPADFHK.E           |
| N49   | P05546  | K.GGETAQSADPQWEQLN*KN*LSMPLLPADFHK.E          |
| N188  | P05546  | K.DFVN*ASSK.Y                                 |
| N93   | P02763  | R.QDQCIYN*TTYLN*VQR.E                         |
| N2790 | P04275  | R.TEPMQ*VALHCTN*GSVVYHEVLN*AMECK.C            |
| N2635 | P04275  | R.KTTCNPCPLGYKEEN*NTGECCGR.C                  |
| N2357 | P04275  | R.GLQPTLTNPGECRPN*FTCACR.K                    |
| N252  | P51884  | R.LSHNELADSGIPGNSFN*VSSLVELDLSYNK.L           |
| N160  | P51884  | K.LGSFEGLVN*LTFIHLQHNR.L                      |
| N252  | P51884  | R.LSHNELADSGIPGN*SFN*VSSLVELDLSYN*K.L         |
| N127  | P51884  | K.LHINHN*N*LTESVGPLPK.S                       |
| N360  | P07996  | K.VSCPIMPCSN*ATVPDGECCPR.C                    |
| N174  | P49908  | K.KCGN*CSLTTLKDEDFCK.R                        |
| N277  | P02748  | R.FSYSKN*ETYQLFLSYSSK.K                       |
| N109  | P25311  | K.DIVEYYN*DSN*GSHVLQ*GR.F                     |
| N112  | P25311  | K.DIVEYYN*DSN*GSHVLQ*GR.F                     |
| N238  | P29622  | K.DFYVDEN*TTVR.V                              |
| N91   | Q06033  | K.TAFITN*FTLTIDGVTPGNVK.E                     |
| N580  | Q06033  | R.KN*AHGEEKEN*LTAR.A                          |
| N406  | P09871  | R.YTCEEPYYYM#EN*GGGGEYHCAGN*GSWVN*EVLGPELPK.C |
| N406  | P09871  | R.YTCEEPYYYMEN*GGGGEYHCAGN*GSWVNEVLGPELPK.C   |
| N174  | P09871  | K.NCGVN*CSGDVFTALIGEIASPNYPKYPENS.R.C         |
| N174  | P09871  | K.NCGVN*CSGDVFTALIGEIASPNYPKYPEN*SR.C         |
| N135  | O95445  | K.TELFSSSCP GGIMLN*ETGQ*GYQR.F                |
| N135  | O95445  | K.TELFSSSCP GGIM#LN*ETGQ*GYQ*R.F              |
| N135  | O95445  | K.TELFSSSCP GGIM#LN*ETGQ*GYQR.F               |
| N840  | Q13201  | R.KYQQN*MSHLEEK.L                             |
| N431  | Q13201  | K.VN*ESVVSIAAQK.F                             |
| N981  | Q13201  | K.TQAALSN*LTCCIDR.S                           |
| N136  | Q13201  | K.FNPGAESVVLN*STLK.F                          |
| N369  | P08185  | K.AVLQLN*EEGVDTAGSTGVTLN*LTSKPIILR.F          |
| N369  | P08185  | K.AVLQ*LNEEGVDTAGSTGVTLN*LTSKPIILR.F          |
| N186  | P02750  | R.KLPPGLLAN*FTLLR.T                           |

| Site  | Protein | Modified Sequence                   |
|-------|---------|-------------------------------------|
| N186  | P02750  | K.LPPGLLAN*FTLLR.T                  |
| N70   | P05156  | K.N*GTAVCATNR.R                     |
| N103  | P05156  | K.FLN*N*GTCTAEGK.F                  |
| N5242 | Q9Y6R7  | R.GLCVLSVGAN*LTTFDGAR.G             |
| N1743 | Q9Y6R7  | R.VVTVAALGTN*ISIHKDEIGK.V           |
| N93   | P19652  | R.QNQCFYN*SSYLVNQR.E                |
| N93   | P19652  | R.QN*QCFYN*SSYLVNQR.E               |
| N71   | P20851  | K.EWDN*TTTECR.L                     |
| N64   | P20851  | K.TLFCN*ASK.E                       |
| N245  | P55058  | R.N*WSLPNR.A                        |
| N398  | Q08380  | R.YKGLN*LTEDTYKPR.I                 |
| N433  | P00748  | R.RN*HSCEPCQTLAVR.S                 |
| N359  | P22792  | K.LYLGSNNLTALHPALFQ*N*LSKLELLSLSK.N |
| N162  | P05160  | R.KEHETCLAPELYNGN*YSTTQK.T          |
| N162  | P05160  | K.EHETCLAPELYN*GN*YSTTQK.T          |
| N382  | Q96KN2  | R.LVPHMN*VSAVEK.Q                   |
| N368  | P35858  | K.AGAFLGLTNVAVM#N*LSGNCLR.N         |
| N186  | P01833  | K.QIGLYPVLVIDSSGYVNPV*YTGR.I        |
| N115  | P02760  | K.SKWN*ITMESYVVHTNYDEYAIFLTK.K      |
| N444  | Q16610  | K.HIPGLIHN*M#TAR.C                  |
| N356  | P13473  | R.VQPFN*VTQGK.Y                     |
| N49   | P13473  | K.WQMN*FTVR.Y                       |
| N71   | P01591  | R.IIVPLNNREN*ISDPTSPLR.T            |
| N824  | P54289  | K.IDVNSWIEN*FTK.T                   |
| N324  | P54289  | K.DAVNN*ITAK.G                      |
| N181  | P40197  | K.LLDLSGN*N*LTHLPK.G                |
| N296  | P04180  | R.MAWPEDHVFISTPSFN*YTGR.D           |
| N44   | P04180  | K.AELSN*HTRPVILVPGCLGN*QLEAK.L      |
| N189  | O75636  | R.VELEDFNGN*R.T                     |
| N82   | Q16890  | K.QN*FSKSWHDMQ*TTTAYKK.T            |
| N51   | P41222  | R.WFSAGLASN*SSWLR.E                 |
| N468  | Q04756  | R.DSVSVVLGQHFFN*R.T                 |
| N296  | P26927  | R.GTAN*TTTAGVPCQR.W                 |
| N483  | P06276  | R.DN*YTKAEELSR.S                    |
| N419  | Q6YHK3  | K.IN*YTVPSGTFK.I                    |
| N337  | Q6YHK3  | R.N*VSTNVFFK.Q                      |
| N686  | P02671  | R.MDGSLNFN*R.T                      |
| N108  | Q02985  | R.KFVQGN*STEVACHPGYGLPK.A           |
| N101  | Q9BY67  | R.FQLLN*FSSSELK.V                   |
| N43   | P13987  | K.TAVN*CSSDFDACLITK.A               |
| N78   | P02679  | K.VDKDLQSLEDILHQVEN*K.T             |

| Site  | Protein | Modified Sequence                             |
|-------|---------|-----------------------------------------------|
| N107  | P08294  | K.LDAFFALEGFPTEPN*SSSR.A                      |
| N203  | Q92820  | K.N*FTMNEK.L                                  |
| N411  | Q13822  | K.AIIAN*LTCK.K                                |
| N845  | Q9H8L6  | K.FN*TTYINIGSSYPPEHGYFR.A                     |
| N62   | P11279  | K.N*MTFDLPSDATVVVLN*R.S                       |
| N76   | P11279  | K.N*MTFDLPSDATVVVLN*R.S                       |
| N2209 | P12259  | K.TWN*QSIAR.L                                 |
| N171  | P20160  | R.FVN*VTVTPEDQCRPNNVCTGVLTR.R                 |
| N296  | Q9Y5C1  | R.IDGSQNFN*ETWENYK.Y                          |
| N47   | P13598  | K.GSLEVN*CSTTCNQPEVGGLETSLDK.I                |
| N150  | O14786  | K.RGPECSQN*YTTPSGVIK.S                        |
| N251  | P02786  | K.DFEDLYTPVN*GSIVIVR.A                        |
| N117  | Q6EMK4  | R.LHEITN*ETFR.G                               |
| N143  | Q86SQ4  | K.GFN*ASYIR.V                                 |
| N288  | Q99784  | K.SMVDFMNTDN*FTSHR.L                          |
| N358  | P11597  | K.GVVVN*SSVMVK.F                              |
| N35   | P43003  | K.KVQ*N*ITK.E                                 |
| N378  | Q9NZK5  | R.NILDALMLN*TTR.I                             |
| N638  | P55290  | K.IN*NTHALVSLQLNLK.A                          |
| N69   | Q9UBG0  | R.VTPACN*TSLPAQR.W                            |
| N385  | P48740  | R.NN*LTTYK.S                                  |
| N379  | P40189  | K.SHLQN*YTVN*ATK.L                            |
| N383  | P40189  | K.SHLQN*YTVN*ATK.L                            |
| N1115 | Q7Z7M0  | R.GYQGDGISHCN*R.T                             |
| N983  | P04114  | K.QVFPGLN*YCTSGAYSN*ASSTDSASYPLTGDTR.L        |
| N2779 | P04114  | K.IQSPLFTLDANADIGN*GTTSAN*EAGIAASITAK.G       |
| N2779 | P04114  | K.IQ*SPLFTLDAN*ADIGN*GTTSANEAGIAASITAK.G      |
| N2982 | P04114  | R.VNQN*LVYESGSLN*FSK.L                        |
| N396  | P01023  | R.GNEANYYSN*ATTDEHGLVQFSINTTN*VMGTSLTVR.V     |
| N1424 | P01023  | K.VSN*QTLSLFFTFLVLDVQDVPVR.D                  |
| N410  | P01023  | R.GNEAN*YYSNATTDEHGLVQ*FSIN*TTN*VMGTSLTVR.V   |
| N396  | P01023  | R.GN*EAN*YYSN*ATTDEHGLVQ*FSIN*TTNVMGTSLTVR.V  |
| N410  | P01023  | R.GN*EAN*YYSN*ATTDEHGLVQ*FSIN*TTNVMGTSLTVR.V  |
| N396  | P01023  | R.GNEAN*YYSN*ATTDEHGLVQ*FSIN*TTNVMGTSLTVR.V   |
| N410  | P01023  | R.GNEAN*YYSN*ATTDEHGLVQ*FSIN*TTNVMGTSLTVR.V   |
| N396  | P01023  | R.GN*EAN*YYSN*ATTDEHGLVQ*FSIN*TTN*VMGTSLTVR.V |
| N410  | P01023  | R.GN*EAN*YYSN*ATTDEHGLVQ*FSIN*TTN*VMGTSLTVR.V |
| N1424 | P01023  | R.TEVSSN*HVLIYLDKVSQ*Q*TLSLFFTFLVLDVQDVPVR.D  |
| N272  | P01871  | K.THTN*ISESHPNATFSAVGEASICEDDWNNGER.F         |
| N209  | P01871  | R.GLTFQ*Q*N*ASSMCVPDQDPAIR.V                  |
| N272  | P01871  | K.THTN*ISESHPNATFSAVGEASICEDDWN*SGER.F        |

| Site  | Protein | Modified Sequence                                   |
|-------|---------|-----------------------------------------------------|
| N209  | P01871  | R.GLTFQQ*N*ASSM#CVPDQDPAIR.V                        |
| N279  | P01871  | K.THTNISESHPN*ATFSAVGEASICEDDWNSEGER.F              |
| N187  | P01008  | R.LFGDKSLTFN*ETYQDISELVYGAK.L                       |
| N128  | P01008  | K.LGACN*DTLQ*Q*LMEVFKFDTISEK.T                      |
| N802  | P08603  | R.WDPEVN*CSM#AQ*IQ*LCPPPPQIPNSHN*MTTTLN*YR.D        |
| N822  | P08603  | R.WDPEVN*CSM#AQ*IQ*LCPPPPQIPNSHN*MTTTLN*YR.D        |
| N802  | P08603  | R.WDPEVN*CSM#AQ*IQ*LCPPPPQ*IPNSHN*MTTTLN*YR.D       |
| N822  | P08603  | R.WDPEVN*CSM#AQ*IQ*LCPPPPQ*IPNSHN*MTTTLN*YR.D       |
| N822  | P08603  | R.WDPEVNCMAQIQLCPPPPQIPN*SHN*MTTTLN*YR.D            |
| N822  | P08603  | R.WDPEVNCMAQIQLCPPPPQIPNSHN*MTTTLN*YR.D             |
| N529  | P08603  | K.LN*DTLDYECHDGYESN*TGSTTGSIVCGYNGWSDLPICYER.E      |
| N184  | P00738  | K.M#VSHHN*LTTGATLINEQ*WLLTTAK.N                     |
| N127  | P01011  | R.TLN*QSSDELQLSM#GNAMFVK.E                          |
| N106  | P01011  | K.GLKFN*LTETSEAEIHQSFQHLLR.T                        |
| N127  | P01011  | R.TLN*QSSDELQLSMGN*AMFVK.E                          |
| N127  | P01011  | R.TLN*QSSDELQLSM#GNAM#FVK.E                         |
| N517  | Q14624  | K.LPTQN*ITFQ*TESSVAEQEAEFQSPK.Y                     |
| N517  | Q14624  | K.LPTQ*N*ITFQTESSVAEQEAEFQ*SPK.Y                    |
| N577  | Q14624  | R.N*Q*ALN*LSLAYSFVTPLTSMVVTKPDDQEQ*SQ*VAEKPMEGESR.N |
| N517  | Q14624  | K.LPTQN*ITFQTESSVAEQ*EAEFQ*SPK.Y                    |
| N397  | P00450  | K.EN*LTAPGSDSAVFFEQ*GTTR.I                          |
| N762  | P00450  | K.ELHHLQ*EQN*VSNAFLDK.G                             |
| N240  | P02790  | R.GHGHRN*GTGHGN*STHHGPEYM#R.C                       |
| N246  | P02790  | R.GHGHRN*GTGHGN*STHHGPEYM#R.C                       |
| N506  | P04003  | R.LSVDKDQYVEPEN*VTIQCDSGYGVVGPQ*SITCSGN*R.T         |
| N528  | P04003  | R.LSVDKDQYVEPEN*VTIQCDSGYGVVGPQ*SITCSGN*R.T         |
| N1007 | P02751  | K.LDAPTQ*LQ*FVN*ETDSTVLVR.W                         |
| N430  | P02751  | R.GGNSN*GALCHFPFLYNNHN*YTDCTSEGR.R                  |
| N176  | P02765  | K.AALAAFNAQNN*GSNFQ*LEEISR.A                        |
| N176  | P02765  | K.AALAFN*AQNN*GSNFQLEEISR.A                         |
| N354  | P10909  | K.M#LN*TSSLLEQLN*EQFNWVSR.L                         |
| N374  | P10909  | R.LAN*LTQGEDQ*YYLR.V                                |
| N103  | P10909  | K.LKELPGVCN*ETM#MALWEECKPCLK.Q                      |
| N193  | P02749  | R.DTAVFECLPQ*HAM#FGNDTITCTTHGN*WTK.L                |
| N285  | P19827  | K.ICDLLVANNHFAHFFAPQ*N*LTNMNK.N                     |
| N1043 | O75882  | K.M#PSQAPTGNFYPPQ*PLLN*SSMCLEDSR.Y                  |
| N1043 | O75882  | K.MPSQAPTGNFYPPQ*PLLN*SSMCLEDSR.Y                   |
| N86   | P04004  | K.N*N*ATVHEQ*VGGPSLTSDLQAQSK.G                      |
| N86   | P04004  | K.NN*ATVHEQ*VGGPSLTSDLQAQ*SK.G                      |
| N98   | P05090  | R.ADGTVN*Q*IEGEATPVN*LTEPAKLEVK.F                   |
| N146  | P02745  | R.NPPMGGNVVIFDTVITNQ*EOPYQ*N*HSGR.F                 |



| Site  | Protein | Modified Sequence                                      |
|-------|---------|--------------------------------------------------------|
| N294  | P01042  | K.LNAEN*N*ATFYFK.I                                     |
| N127  | P51884  | K.KLHIN*HNN*LTESVGPLPK.S                               |
| N2635 | P04275  | R.KTTCN*PCPLGYKEEN*N*TGECCGR.C                         |
| N2585 | P04275  | R.MEACM#LN*GTVIGPGK.T                                  |
| N56   | P02763  | K.WFYIASAFRN*EEYN*K.S                                  |
| N109  | P25311  | K.DIVEYYN*DSNGSHVLQ*GR.F                               |
| N324  | P27169  | K.VTQ*VYAEN*GTVLQGSTVASVYK.G                           |
| N64   | P20851  | K.TLFCN*ASKEWDN*TTTECR.L                               |
| N71   | P20851  | K.TLFCN*ASKEWDN*TTTECR.L                               |
| N174  | P09871  | K.N*CGVN*CSGDVFTALIGEIASPN*YPKYPENSR.C                 |
| N308  | P00747  | R.GNVAVTVSGHTCQHWSAQTPTHN*R.T                          |
| N344  | Q13201  | K.KIDN*ISLTVNDVR.N                                     |
| N79   | P02750  | R.SDHGSSISCQ*PPAEIPGYLPADTVHLAVEFFN*LTHLPAN*LLQ*GASK.L |
| N43   | P07357  | R.AATPAAVTCQ*LSN*WSEWTD CFP CQ*DKK.Y                   |
| N90   | P01833  | R.ANLTN*FPEN*GTFVVNIAQLSQDDSGR.Y                       |
| N421  | P01833  | R.LSLLEEPGN*GTFTVILNQLTSR.D                            |
| N348  | P22792  | K.LYLGSNN*LTALHPALFQN*LSKLELLSLSK.N                    |
| N359  | P22792  | K.LYLGSNN*LTALHPALFQN*LSKLELLSLSK.N                    |
| N150  | P43251  | R.FN*DTEVLQR.L                                         |
| N199  | P17936  | K.VDYESQSTDTQN*FSSESK.R                                |
| N382  | Q96KN2  | R.LVPHM#N*VSAVEK.Q                                     |
| N162  | P05160  | K.EHETCLAPELYNGN*YSTTQK.T                              |
| N545  | P05160  | K.HGVIISSVDTYEN*GSSVEYR.C                              |
| N91   | Q9Y6R7  | K.VTVRPGESVMVN*ISAK.A                                  |
| N25   | Q9NZT1  | K.AFSAVDTDGN*GTINAQELGAALK.A                           |
| N513  | P06276  | K.YGNPNETQN*N*STSWPVFK.S                               |
| N44   | P04180  | K.AELSN*HTRPVILVPGCLGNQLEAK.L                          |
| N666  | Q8IZF2  | K.LNLVPGEN*ITCQDPVIGVGEPEGK.V                          |
| N275  | P07333  | K.VLTLNLDQ*VDFQHAGN*YSCVASNVQGK.H                      |
| N290  | P04070  | K.EV FVHPN*YSK.S                                       |
| N111  | P12821  | K.ELYEPIWQN*FTDPQLR.R                                  |
| N88   | Q9NTU7  | R.STNHEPSEMSN*K.T                                      |
| N666  | Q16853  | R.KEEEPSSSSVFNQNDPWAPTVD FSDFINN*ETIAGK.D              |
| N241  | Q16620  | K.HMN*ETSHTQGSLR.I                                     |
| N136  | P54289  | K.DDL DPEKN*DSEPGSQ*R.I                                |
| N196  | Q9UHG3  | K.LLHALGGDDFLGMLN*R.T                                  |
| N113  | Q9BY67  | K.VSLTN*VSISDEGR.Y                                     |
| N446  | Q07954  | R.FN*STEYQVVTR.V                                       |
| N403  | Q6UXB8  | K.SLPNFPN*TSATAN*ATGGR.A                               |
| N409  | Q6UXB8  | K.SLPNFPN*TSATAN*ATGGR.A                               |
| N1159 | Q92954  | R.N*GTLVAFR.G                                          |

| <b>Site</b> | <b>Protein</b> | <b>Modified Sequence</b> |
|-------------|----------------|--------------------------|
| N1581       | P35555         | K.AWGTPCEMCPAVN*TSEYK.I  |

Table S7. *N*-glycopeptides enriched by poly(IM)@MAR from 2  $\mu$ L of human serum digest

| <b>Site</b> | <b>Protein</b> | <b>Modified Sequence</b>                  |
|-------------|----------------|-------------------------------------------|
| N983        | P04114         | K.QVFPGLNYCTSGAYSN*ASSTDSASYPLTGDTR.L     |
| N3895       | P04114         | R.FEVDSPVYN*ATWSASLK.N                    |
| N185        | P04114         | K.QVLFLDTVYGN*CSTHFTVK.T                  |
| N2239       | P04114         | K.TIHDLHLFIENIDFN*K.S                     |
| N3336       | P04114         | K.ELCTISHIFIPAM#GN*ITYDFSFK.S             |
| N2779       | P04114         | K.IQSPLFTLDANADIGN*GTTSANEAGIAASITAK.G    |
| N2779       | P04114         | K.IQSPLFTLDAN*ADIGN*GTTSANEAGIAASITAK.G   |
| N2779       | P04114         | K.IQ*SPLFTLDAN*ADIGN*GTTSAN*EAGIAASITAK.G |

| Site  | Protein | Modified Sequence                            |
|-------|---------|----------------------------------------------|
| N3336 | P04114  | K.ELCTISHIFIPAMGN*ITYDFSFK.S                 |
| N3411 | P04114  | K.FVEGSHN*STVSLTTK.N                         |
| N1523 | P04114  | R.FN*SSYLQGTN*QITGR.Y                        |
| N3465 | P04114  | K.YDFN*SSM#LYSTAK.G                          |
| N2982 | P04114  | R.VNQNLVYESGSLN*FSK.L                        |
| N3411 | P04114  | K.LATALSLSNKFVEGSHN*STVSLTTK.N               |
| N3465 | P04114  | K.YDFN*SSMLYSTAK.G                           |
| N271  | P01009  | K.YLGN*ATAIFFLPDEGK.L                        |
| N107  | P01009  | K.ADTHDEILEGLNFN*LTEIPEAQIHEGFQELLR.T        |
| N107  | P01009  | K.ADTHDEILEGLN*FN*LTEIPEAQ*IHEGFQ*ELLR.T     |
| N107  | P01009  | K.ADTHDEILEGLN*FN*LTEIPEAQ*IHEGFQELLR.T      |
| N271  | P01009  | K.YLGN*ATAIFFLPDEGKLQHLENELTHDIITK.F         |
| N271  | P01009  | K.YLGN*ATAIFFLPDEGKLQHLEN*ELTHDIITK.F        |
| N70   | P01009  | R.QLAHQSN*STNIFFSPVSIATAFAM#LSLGTK.A         |
| N70   | P01009  | R.QLAHQSN*STNIFFSPVSIATAFAMLSLGTK.A          |
| N107  | P01009  | K.ADTHDEILEGLNFN*LTEIPEAQ*IHEGFQ*ELLR.T      |
| N107  | P01009  | K.ADTHDEILEGLN*FN*LTEIPEAQIHEGFQELLR.T       |
| N107  | P01009  | K.ADTHDEILEGLNFN*LTEIPEAQ*IHEGFQELLR.T       |
| N869  | P01023  | K.SLGNVN*FTVSAEALESQELCGTEVPSVPEHGRK.D       |
| N869  | P01023  | K.SLGNVN*FTVSAEALESQELCGTEVPSVPEHGRK.K       |
| N869  | P01023  | K.SLGNVN*FTVSAEALESQ*ELCGTEVPSVPEHGRK.D      |
| N869  | P01023  | K.SLGN*VN*FTVSAEALESQ*ELCGTEVPSVPEHGRK.K     |
| N869  | P01023  | K.SLGNVN*FTVSAEALESQ*ELCGTEVPSVPEHGRK.K      |
| N396  | P01023  | R.GNEANYYSN*ATTDEHGLVQ*FSIN*TTNVMGTSLTVR.V   |
| N410  | P01023  | R.GNEANYYSN*ATTDEHGLVQ*FSIN*TTNVMGTSLTVR.V   |
| N396  | P01023  | R.GNEANYYSN*ATTDEHGLVQFSIN*TTNVMGTSLTVR.V    |
| N410  | P01023  | R.GNEANYYSN*ATTDEHGLVQFSIN*TTNVMGTSLTVR.V    |
| N410  | P01023  | R.GNEANYYSNATTDEHGLVQ*FSIN*TTNVMGTSLTVR.V    |
| N396  | P01023  | R.GNEANYYSN*ATTDEHGLVQ*FSIN*TTNVM#GTSLTVR.V  |
| N410  | P01023  | R.GNEANYYSN*ATTDEHGLVQ*FSIN*TTNVM#GTSLTVR.V  |
| N396  | P01023  | R.GNEANYYSN*ATTDEHGLVQFSINTTN*VMGTSLTVR.V    |
| N396  | P01023  | R.GNEANYYSN*ATTDEHGLVQ*FSIN*TTN*VM#GTSLTVR.V |
| N410  | P01023  | R.GNEANYYSN*ATTDEHGLVQ*FSIN*TTN*VM#GTSLTVR.V |
| N396  | P01023  | R.GNEANYYSN*ATTDEHGLVQ*FSIN*TTN*VMGTSLTVR.V  |
| N410  | P01023  | R.GNEANYYSN*ATTDEHGLVQ*FSIN*TTN*VMGTSLTVR.V  |
| N55   | P01023  | K.GCVLLSYLN*ETVTVSASLESVR.G                  |
| N396  | P01023  | R.GN*EAN*YYSN*ATTDEHGLVQFSIN*TTN*VMGTSLTVR.V |
| N410  | P01023  | R.GN*EAN*YYSN*ATTDEHGLVQFSIN*TTN*VMGTSLTVR.V |
| N1424 | P01023  | K.VSN*QTLSLFFTVLQDVPVR.D                     |
| N410  | P01023  | R.GN*EANYYSNATTDEHGLVQ*FSIN*TTN*VMGTSLTVR.V  |
| N396  | P01023  | R.GNEAN*YYSN*ATTDEHGLVQ*FSINTTN*VMGTSLTVR.V  |

| Site  | Protein | Modified Sequence                            |
|-------|---------|----------------------------------------------|
| N410  | P01023  | R.GNEANYYSNATTDEHGLVQFSIN*TTN*VM#GTSLTVR.V   |
| N396  | P01023  | R.GNEAN*YYSN*ATTDEHGLVQ*FSIN*TTN*VMGTSLTVR.V |
| N410  | P01023  | R.GNEAN*YYSN*ATTDEHGLVQ*FSIN*TTN*VMGTSLTVR.V |
| N410  | P01023  | R.GNEAN*YYSNATTDEHGLVQ*FSIN*TTN*VM#GTSLTVR.V |
| N85   | P01024  | K.TVLTPATNHM#GN*VTFTIPANR.E                  |
| N85   | P01024  | K.TVLTPATN*HM#GN*VTFTIPAN*R.E                |
| N85   | P01024  | K.TVLTPATNHMGN*VTFTIPANR.E                   |
| N85   | P01024  | K.TVLTPATN*HMGN*VTFTIPANR.E                  |
| N128  | P01008  | K.LGACN*DTLQQLM#EVFK.F                       |
| N128  | P01008  | K.LGACN*DTLQQLMEVFK.F                        |
| N224  | P01008  | K.WVSN*KTEGR.I                               |
| N187  | P01008  | K.SLTFN*ETYQDISELVYGAK.L                     |
| N128  | P01008  | K.LGACN*DTLQQLM#EVFKFDTISEK.T                |
| N187  | P01008  | R.LFGDKSLTFN*ETYQDISELVYGAK.L                |
| N128  | P01008  | K.LGACN*DTLQ*QLMEVFK.F                       |
| N128  | P01008  | K.LGACN*DTLQQLMEVFKFDTISEK.T                 |
| N187  | P01008  | K.SLTFN*ETYQ*DISELVYGAK.L                    |
| N224  | P01008  | R.AAINKWVSN*KTEGR.I                          |
| N440  | P01871  | K.STGKPTLYN*VSLVM#SDTAGTCY.-                 |
| N272  | P01871  | K.THTN*ISESHPN*ATFSAVGEASICEDDWN*SGER.F      |
| N279  | P01871  | K.THTN*ISESHPN*ATFSAVGEASICEDDWN*SGER.F      |
| N440  | P01871  | K.STGKPTLYN*VSLVMSDTAGTCY.-                  |
| N46   | P01871  | K.YKN*NSDISSTR.G                             |
| N272  | P01871  | K.THTN*ISESHPN*ATFSAVGEASICEDDWN*SGER.F      |
| N279  | P01871  | K.THTN*ISESHPN*ATFSAVGEASICEDDWN*SGER.F      |
| N46   | P01871  | K.YKN*N*SDISSTR.G                            |
| N272  | P01871  | K.THTN*ISESHPNATFSAVGEASICEDDWN*SGER.F       |
| N209  | P01871  | R.GLTFQQ*N*ASSMCVPDQDTAIR.V                  |
| N209  | P01871  | R.GLTFQQN*ASSM#CVPDQDTAIR.V                  |
| N209  | P01871  | R.GLTFQQN*ASSMCVPDQDTAIR.V                   |
| N209  | P01871  | R.GLTFQQ*N*ASSMCVPDQ*DTAIR.V                 |
| N209  | P01871  | R.GLTFQQN*ASSMCVPDQ*DTAIR.V                  |
| N209  | P01871  | R.GLTFQ*QN*ASSMCVPDQDTAIR.V                  |
| N180  | P01857  | R.EEQYN*STYR.V                               |
| N180  | P01857  | K.TKPREEQYN*STYR.V                           |
| N180  | P01857  | R.EEQ*YN*STYR.V                              |
| N630  | P02787  | R.QQHLFGSN*VTDCSGNFCLFR.S                    |
| N630  | P02787  | R.QQHLFGSN*VTDCSGN*FCLFR.S                   |
| N432  | P02787  | K.CGLVPVLAENYN*K.S                           |
| N432  | P02787  | K.CGLVPVLAEN*YN*K.S                          |
| N1007 | P02751  | K.LDAPTNLQFVN*ETDSTVLVR.W                    |

| Site  | Protein | Modified Sequence                              |
|-------|---------|------------------------------------------------|
| N528  | P02751  | R.DQCIVDDITYNVN*DTFHK.R                        |
| N1007 | P02751  | K.LDAPTNLQ*FVN*ETDSTVLVR.W                     |
| N542  | P02751  | R.HEEGHM#LN*CTCFGQGR.G                         |
| N542  | P02751  | K.RHEEGHMLN*CTCFGQGR.G                         |
| N430  | P02751  | R.GGN*SNGALCHFPFLYNNHN*YTDCTSEGR.R             |
| N430  | P02751  | R.GGN*SN*GALCHFPFLYN*N*HN*YTDCTSEGR.R          |
| N1095 | P08603  | R.SPYEMFGDEEVM#CLN*GN*WTEPPQCK.D               |
| N802  | P08603  | R.WDPEVN*CSM#AQIQLCPPPPQIPNSHN*MTTTLN*YR.D     |
| N822  | P08603  | R.WDPEVN*CSM#AQIQLCPPPPQIPNSHN*MTTTLN*YR.D     |
| N822  | P08603  | R.WDPEVNC SMAQIQLCPPPPQIPN*SHN*MTTTLN.YR.D     |
| N802  | P08603  | R.WDPEVN*CSMAQIQLCPPPPQIPNSHNMTTTLN*YR.D       |
| N802  | P08603  | R.WDPEVN*CSMAQIQLCPPPPQIPNSHN*MTTTLN*YR.D      |
| N822  | P08603  | R.WDPEVN*CSMAQIQLCPPPPQIPNSHN*MTTTLN*YR.D      |
| N802  | P08603  | R.WDPEVN*CSMAQ*IQ*LCPPPPQ*IPN*SHN*MTTTLN*YR.D  |
| N822  | P08603  | R.WDPEVN*CSMAQ*IQ*LCPPPPQ*IPN*SHN*MTTTLN*YR.D  |
| N529  | P08603  | K.LN*DTLDYECHDGYESN*TGSTTGSIVCGYNGWSDLPICYER.E |
| N1095 | P08603  | R.SPYEMFGDEEVMCLN*GN*WTEPPQCK.D                |
| N1095 | P08603  | R.SPYEMFGDEEVM#CLN*GN*WTEPPQ*CK.D              |
| N1095 | P08603  | R.SPYEMFGDEEVMCLNGN*WTEPPQCK.D                 |
| N911  | P08603  | R.ISEEN*ETTCYM#GK.W                            |
| N1029 | P08603  | K.M#DGASN*VTCINSR.W                            |
| N1029 | P08603  | K.MDGASN*VTCIN*SR.W                            |
| N882  | P08603  | K.IPCSQPPQIEHGTIN*SSR.S                        |
| N911  | P08603  | R.ISEEN*ETTCYMGK.W                             |
| N217  | P08603  | K.SPDVIN*GSPISQK.I                             |
| N822  | P08603  | R.WDPEVNC SM#AQIQLCPPPPQ*IPN*SHN*MTTTLN.YR.D   |
| N184  | P00738  | K.M#VSHHN*LTTGATLINEQWLLTTAK.N                 |
| N184  | P00738  | K.MVSHHN*LTTGATLIN*EQWLLTTAK.N                 |
| N184  | P00738  | K.MVSHHN*LTTGATLINEQWLLTTAK.N                  |
| N184  | P00738  | K.MVSHHN*LTTGATLINEQ*WLLTTAK.N                 |
| N241  | P00738  | K.VVLHPN*YSQ*VDIGLIK.L                         |
| N241  | P00738  | K.VVLHPN*YSQVDIGLIK.L                          |
| N211  | P00738  | K.NLFLNHSEN*ATAK.D                             |
| N207  | P00738  | K.NLFLN*HSENATAK.D                             |
| N207  | P00738  | K.NLFLN*HSEN*ATAK.D                            |
| N211  | P00738  | K.NLFLN*HSEN*ATAK.D                            |
| N207  | P00738  | K.N*LFLN*HSEN*ATAK.D                           |
| N211  | P00738  | K.N*LFLN*HSEN*ATAK.D                           |
| N118  | P02766  | K.ALGISPFHEHAEVVFTAN*DSGPR.R                   |
| N1391 | P0C0L4  | K.N*TTCQDLQIEVTVK.G                            |
| N226  | P0C0L4  | R.FSDGLESN*SSTQFEVK.K                          |

| Site  | Protein | Modified Sequence                    |
|-------|---------|--------------------------------------|
| N1328 | P0C0L4  | R.GLN*VTLSSSTGR.N                    |
| N1328 | P0C0L4  | R.GLN*VTLSSSTGRN*GFK.S               |
| N127  | P01011  | R.TLN*QSSDELQLSM#GNAMFVK.E           |
| N127  | P01011  | R.TLN*QSSDELQLSMGNAMFVK.E            |
| N106  | P01011  | K.FN*LTETSEAEIHQSFQHLLR.T            |
| N271  | P01011  | K.YTGN*ASALFILPDQ*DKMEEVEAMLLPETLK.R |
| N127  | P01011  | R.TLN*QSSDELQ*LSMGNAMFVK.E           |
| N127  | P01011  | R.TLN*Q*SSDELQLSMGN*AMFVK.E          |
| N93   | P01011  | K.NVIFSPLSISTALAFSLGAHN*TTLTEILK.G   |
| N127  | P01011  | R.TLN*Q*SSDELQLSMGNAMFVK.E           |
| N358  | P00450  | K.AGLQAFFQVQECN*K.S                  |
| N397  | P00450  | K.EN*LTAPGSDSAVFFEQGTTR.I            |
| N762  | P00450  | K.ELHHLQEQN*VSNAFLDKGEFYIGSK.Y       |
| N138  | P00450  | K.EHEGAIYPDND*TTDFQR.A               |
| N762  | P00450  | K.ELHHLQEQN*VSN*AFLDK.G              |
| N762  | P00450  | K.ELHHLQEQN*VSNAFLDK.G               |
| N86   | P10909  | K.KKEDALN*ETR.E                      |
| N103  | P10909  | K.ELPGVCN*ETM#MALWEECKPCLK.Q         |
| N103  | P10909  | K.LKELPGVCN*ETMMALWEECKPCLK.Q        |
| N103  | P10909  | K.ELPGVCN*ETMM#ALWEECKPCLK.Q         |
| N103  | P10909  | K.ELPGVCN*ETMMALWEECKPCLK.Q          |
| N86   | P10909  | K.KEDALN*ETR.E                       |
| N354  | P10909  | K.MLN*TSSLLEQLN*EQFNWVSR.L           |
| N354  | P10909  | K.M#LN*TSSLLEQLNEQFNWVSR.L           |
| N354  | P10909  | K.MLN*TSSLLEQLNEQFNWVSR.L            |
| N354  | P10909  | K.MLN*TSSLLEQ*LNEQFNWVSR.L           |
| N86   | P10909  | K.EDALN*ETR.E                        |
| N374  | P10909  | R.LAN*LTQGEDQ*YYLR.V                 |
| N374  | P10909  | R.LAN*LTQGEDQYYLR.V                  |
| N253  | P05155  | R.VLSN*NSDANLELINTWVAK.N             |
| N352  | P05155  | K.AKVGQLQLSHN*LSLVILVPQNLK.H         |
| N352  | P05155  | K.VGQLQLSHN*LSLVILVPQNLK.H           |
| N253  | P05155  | R.VLSN*NSDAN*LELINTWVAK.N            |
| N25   | P05155  | R.ASSNPN*ATSSSSQDPESLQDR.G           |
| N238  | P05155  | R.DTFVN*ASR.T                        |
| N288  | P02774  | K.LCDN*LSTK.N                        |
| N285  | P19827  | K.ICDLLVANNHFAHFFAPQN*LTNM#NK.N      |
| N285  | P19827  | K.ICDLLVANNHFAHFFAPQN*LTNMNK.N       |
| N285  | P19827  | R.DKICDLLVAN*NHFAHFFAPQN*LTNMNK.N    |
| N285  | P19827  | R.DKICDLLVANNHFAHFFAPQN*LTNM#NK.N    |
| N285  | P19827  | K.ICDLLVANN*HFAHFFAPQN*LTNMNK.N      |

| Site | Protein | Modified Sequence                        |
|------|---------|------------------------------------------|
| N176 | P02765  | K.AALAAFNAQNN*GSN*FQLEEISR.A             |
| N176 | P02765  | K.AALAAFNAQNN*GSNFQLEEISR.A              |
| N176 | P02765  | K.AALAAFNAQ*NN*GSNFQLEEISR.A             |
| N176 | P02765  | K.AALAAFNAQN*N*GSNFQLEEISR.A             |
| N156 | P02765  | R.KVCQDCPLLAPLN*DTR.V                    |
| N156 | P02765  | K.VCQDCPLLAPLN*DTR.V                     |
| N517 | Q14624  | K.LPTQ*N*ITFQ*TESSVAEQEAEFQSPK.Y         |
| N517 | Q14624  | K.LPTQN*ITFQTESSVAEQEAEFQSPK.Y           |
| N517 | Q14624  | K.LPTQN*ITFQ*TESSVAEQEAEFQSPK.Y          |
| N81  | Q14624  | K.KAFITN*FSMIIDGMTYPGIK.E                |
| N81  | Q14624  | K.AFITN*FSM#IIDGMTYPGIK.E                |
| N81  | Q14624  | K.AFITN*FSMIIDGMTYPGIK.E                 |
| N517 | Q14624  | K.LPTQN*ITFQ*TESSVAEQ*EAEFQSPK.Y         |
| N517 | Q14624  | K.LPTQ*N*ITFQTESSVAEQEAEFQSPK.Y          |
| N340 | P01876  | R.LAGKPTHVN*VSVVMAEVDGTCY.-              |
| N144 | P01876  | R.LSLHRPALEDLLLGSEAN*LTCTLTGLR.D         |
| N340 | P01876  | R.LAGKPTHVN*VSVVM#AEVDGTCY.-             |
| N125 | P04196  | R.VIDFN*CTTSSVSSALAN*TK.D                |
| N125 | P04196  | R.VIDFN*CTTSSVSSALANTK.D                 |
| N345 | P04196  | R.HSHN*NN*SSDLHPHK.H                     |
| N344 | P04196  | R.HSHNN*N*SSDLHPHK.H                     |
| N344 | P04196  | R.HSHNN*NSSDLHPHK.H                      |
| N65  | P05090  | R.CIQAN*YSLM#EN*GK.I                     |
| N65  | P05090  | R.CIQAN*YSLMENGK.I                       |
| N65  | P05090  | R.CIQAN*YSLMEN*GK.I                      |
| N98  | P05090  | R.ADGTVNQIEGEATPVN*LTEPAK.L              |
| N98  | P05090  | R.ADGTVNQ*IEGEATPVN*LTEPAK.L             |
| N65  | P05090  | R.CIQ*AN*YSLMEN*GK.I                     |
| N98  | P05090  | R.ADGTVNQ*IEGEATPVN*LTEPAKLEVK.F         |
| N98  | P05090  | R.ADGTVNQIEGEATPVN*LTEPAKLEVK.F          |
| N183 | P02749  | R.DTAVFECLPQHAMFGN*DTITCTTHGN*WTK.L      |
| N193 | P02749  | R.DTAVFECLPQHAMFGN*DTITCTTHGN*WTK.L      |
| N183 | P02749  | R.DTAVFECLPQHAMFGN*DTITCTTHGN*WTKLPECR.E |
| N193 | P02749  | R.DTAVFECLPQHAMFGN*DTITCTTHGN*WTKLPECR.E |
| N183 | P02749  | R.DTAVFECLPQ*HAMFGN*DTITCTTHGN*WTK.L     |
| N193 | P02749  | R.DTAVFECLPQ*HAMFGN*DTITCTTHGN*WTK.L     |
| N162 | P02749  | R.VYKPSAGN*NSLYR.D                       |
| N162 | P02749  | R.VYKPSAGN*N*SLYR.D                      |
| N253 | P02749  | K.LGN*WSAM#PSCK.A                        |
| N183 | P02749  | R.DTAVFECLPQ*HAM#FGN*DTITCTTHGN*WTK.L    |
| N193 | P02749  | R.DTAVFECLPQ*HAM#FGN*DTITCTTHGN*WTK.L    |

| Site  | Protein | Modified Sequence                            |
|-------|---------|----------------------------------------------|
| N183  | P02749  | R.DTAVFECLPQHAM#FGN*DTITCTTHGN*WTK.L         |
| N193  | P02749  | R.DTAVFECLPQHAM#FGN*DTITCTTHGN*WTK.L         |
| N294  | P01042  | K.LNAENN*ATFYFK.I                            |
| N205  | P01042  | R.ITYSIVQTN*CSK.E                            |
| N294  | P01042  | K.LN*AENN*ATFYFK.I                           |
| N169  | P01042  | R.HGIQYFNN*NTQHSSLFMLNEVK.R                  |
| N118  | P19823  | K.GAFISN*FSMTVDGK.T                          |
| N118  | P19823  | K.GAFISN*FSM#TVDGK.T                         |
| N143  | P00734  | R.YPHKPEIN*STTHPGADLQENFCR.N                 |
| N143  | P00734  | R.SRYPHKPEIN*STTHPGADLQEN*FCR.N              |
| N143  | P00734  | R.SRYPHKPEIN*STTHPGADLQENFCR.N               |
| N143  | P00734  | R.YPHKPEIN*STTHPGADLQ*ENFCR.N                |
| N205  | P00734  | R.SEGSSVN*LSPPLEQCVPDR.G                     |
| N416  | P00734  | K.N*FTENDLLVR.I                              |
| N1043 | O75882  | K.MPSQAPTGNFYQPQLN*SSM#CLEDSR.Y              |
| N1043 | O75882  | K.MPSQAPTGNFYQPQLN*SSMCLEDSR.Y               |
| N1082 | O75882  | K.CEN*LTTGK.H                                |
| N1073 | O75882  | K.CIN*Q*SICEK.C                              |
| N264  | O75882  | K.ISN*SSDTVECECSENWK.G                       |
| N914  | O75882  | K.AATCINPLN*GSVCERPAN*HSAK.Q                 |
| N923  | O75882  | K.AATCINPLN*GSVCERPAN*HSAK.Q                 |
| N731  | O75882  | R.N*HSCSEGQISIFR.Y                           |
| N1054 | O75882  | R.YN*WSFIHCPACQCN*GHSK.C                     |
| N383  | O75882  | R.EWLPLN*R.S                                 |
| N240  | P02790  | R.N*GTGHGN*STHHGPEYM#R.C                     |
| N246  | P02790  | R.N*GTGHGN*STHHGPEYM#R.C                     |
| N453  | P02790  | K.ALQPQN*VTSLLGCTH.-                         |
| N453  | P02790  | K.ALQPQ*N*VTSLLGCTH.-                        |
| N64   | P02790  | R.CSDGWSFDATLDDN*GTMLFFK.G                   |
| N240  | P02790  | R.N*GTGHGN*STHHGPEYMR.C                      |
| N246  | P02790  | R.N*GTGHGN*STHHGPEYMR.C                      |
| N187  | P02790  | R.SWPAVGN*CSSALR.W                           |
| N221  | P04003  | R.FSLLGHASISCTVEN*ETIGVWRPSPPTCEK.I          |
| N506  | P04003  | R.LSVDKDQ*YVEPEN*VTIQ*CDSGYGVVGPQSITCSGN*R.T |
| N528  | P04003  | R.LSVDKDQ*YVEPEN*VTIQ*CDSGYGVVGPQSITCSGN*R.T |
| N506  | P04003  | R.LSVDKDQ*YVEPEN*VTIQCDSGYGVVGPQ*SITCSGN*R.T |
| N528  | P04003  | R.LSVDKDQ*YVEPEN*VTIQCDSGYGVVGPQ*SITCSGN*R.T |
| N506  | P04003  | R.LSVDKDQYVEPEN*VTIQ*CDSGYGVVGPQ*SITCSGN*R.T |
| N528  | P04003  | R.LSVDKDQYVEPEN*VTIQ*CDSGYGVVGPQ*SITCSGN*R.T |
| N528  | P04003  | R.LSVDKDQ*YVEPENVTIQCDSGYGVVGPQ*SITCSGN*R.T  |
| N506  | P04003  | R.LSVDKDQYVEPEN*VTIQ*CDSGYGVVGPQSITCSGN*R.T  |



| Site | Protein | Modified Sequence                                  |
|------|---------|----------------------------------------------------|
| N528 | P04003  | R.LSVDKDQYVEPEN*VTIQ*CDSGYGVVGPQSITCSGN*R.T        |
| N506 | P04003  | R.LSVDKDQYVEPEN*VTIQCDSGYGVVGPQSITCSGN*R.T         |
| N528 | P04003  | R.LSVDKDQYVEPEN*VTIQCDSGYGVVGPQSITCSGN*R.T         |
| N285 | P00751  | R.KIVLDPSGSMN*IYLVLDGSDSIGASN*FTGAK.K              |
| N285 | P00751  | R.KIVLDPSGSMNIYLVLDGSDSIGASN*FTGAK.K               |
| N285 | P00751  | K.IVLDPSGSMNIYLVLDGSDSIGASN*FTGAK.K                |
| N285 | P00751  | K.IVLDPSGSMN*IYLVLDGSDSIGASN*FTGAK.K               |
| N93  | P02763  | R.QDQ*CIYN*TTYLVNQR.E                              |
| N72  | P02763  | K.SVQEIQATFFYFTPN*KTEDTIFLR.E                      |
| N93  | P02763  | R.QDQCIYN*TTYLVNQR.E                               |
| N363 | P04217  | R.FQ*SPAGTEALFELHN*ISVADSAN*YSCVYVDLKPPFGGSAPSER.L |
| N371 | P04217  | R.FQ*SPAGTEALFELHN*ISVADSAN*YSCVYVDLKPPFGGSAPSER.L |
| N371 | P04217  | R.FQ*SPAGTEALFELHNISVADSAN*YSCVYVDLKPPFGGSAPSER.L  |
| N363 | P04217  | R.FQSPAGTEALFELHN*ISVADSAN*YSCVYVDLKPPFGGSAPSER.L  |
| N371 | P04217  | R.FQSPAGTEALFELHN*ISVADSAN*YSCVYVDLKPPFGGSAPSER.L  |
| N112 | P06681  | R.LGSYPVGGN*VSFECEDGFILR.G                         |
| N621 | P06681  | K.QSVPAHFVALN*GSK.L                                |
| N467 | P06681  | K.LTDTICGVGN*MSAN*ASDQER.T                         |
| N471 | P06681  | K.LTDTICGVGN*MSAN*ASDQER.T                         |
| N651 | P06681  | K.TM#FPN*LTDVR.E                                   |
| N651 | P06681  | K.TMFPN*LTDVR.E                                    |
| N415 | P02748  | R.AVN*ITSENLIDDVVSLIR.G                            |
| N86  | P04004  | K.NN*ATVHEQVGGPSLTSDLQAQSK.G                       |
| N86  | P04004  | K.NN*ATVHEQ*VGGPSLTSDLQAQSK.G                      |
| N86  | P04004  | K.NN*ATVHEQVGGPSLTSDLQAQ*SK.G                      |
| N177 | P05156  | K.LSDLN*STECLHVHCR.G                               |
| N103 | P05156  | K.FLNN*GTCTAEGK.F                                  |
| N103 | P05156  | K.FLN*N*GTCTAEGK.F                                 |
| N402 | P43652  | R.YAEDKFN*ETTEK.S                                  |
| N33  | P43652  | R.DIENFN*STQK.F                                    |
| N33  | P43652  | R.DIEN*FN*STQK.F                                   |
| N252 | P51884  | R.LSHNELADSGIPGNSFN*VSSLVELDLSYNK.L                |
| N160 | P51884  | K.LGSFEGLVN*LTFIHLQHNR.L                           |
| N88  | P51884  | K.AFEN*VTDLQWLILDHNLLNSK.I                         |
| N127 | P51884  | K.KLHINHNN*LTESVGPLPK.S                            |
| N127 | P51884  | K.LHINHNN*LTESVGPLPK.S                             |
| N127 | P51884  | K.LHINH*N*LTESVGPLPK.S                             |
| N127 | P51884  | K.LHIN*HNN*LTESVGPLPK.S                            |
| N146 | P02745  | R.NPPMGGNVVIFDTVITNQEEPYN*HSGR.F                   |
| N146 | P02745  | R.N*PPMGGNVVIFDTVITNQEEPYN*HSGR.F                  |
| N146 | P02745  | R.RNPPMGGNVVIFDTVITNQEEPYN*HSGR.F                  |

| Site  | Protein | Modified Sequence                           |
|-------|---------|---------------------------------------------|
| N146  | P02745  | R.RNPPMGGNVVIFDTVITNQ*EOPYQ*N*HSGR.F        |
| N49   | P05546  | K.N*LSMPLLPADPHK.E                          |
| N49   | P05546  | K.GGETAQSADPQ*WEQLN*N*KN*LSMPLLPADPHK.E     |
| N188  | P05546  | K.DFVN*ASSKYEITTIHNLFR.K                    |
| N188  | P05546  | K.DFVN*ASSK.Y                               |
| N49   | P05546  | K.N*LSM#PLLPADPHK.E                         |
| N324  | P27169  | K.VTQVYAEN*GTVLQGSTVASVYK.G                 |
| N324  | P27169  | K.VTQVYAEN*GTVLQ*GSTVASVYK.G                |
| N324  | P27169  | K.VTQ*VYAEN*GTVLQ*GSTVASVYK.G               |
| N128  | P25311  | R.FGCEIENN*R.S                              |
| N128  | P25311  | R.FGCEIEN*N*R.S                             |
| N109  | P25311  | K.DIVEYYN*DSN*GSHVLQGR.F                    |
| N112  | P25311  | K.DIVEYYN*DSN*GSHVLQGR.F                    |
| N109  | P25311  | K.DIVEYYN*DSNGSHVLQGR.F                     |
| N437  | P07357  | R.GGSSGWSGGLAQN*R.S                         |
| N1067 | P07996  | K.VVN*STTGPGHELR.N                          |
| N360  | P07996  | K.KVSCPIMPCSN*ATVPDGECCPR.C                 |
| N360  | P07996  | K.VSCPIMPCSN*ATVPDGECCPR.C                  |
| N406  | P09871  | R.YTCEEPYYMEN*GGGGEYHCAGN*GSWVN*EVLGPELPK.C |
| N406  | P09871  | R.YTCEEPYYMEN*GGGGEYHCAGN*GSWVNEVLGPELPK.C  |
| N174  | P09871  | K.NCGVN*CSGDVFTALIGEIASPNYPKYPENSR.C        |
| N174  | P09871  | K.NCGVN*CSGDVFTALIGEIASPNYPKYPEN*SR.C       |
| N174  | P09871  | K.N*CGVN*CSGDVFTALIGEIASPNYPKYPENSR.C       |
| N367  | Q96PD5  | R.LEPVHLQLQCMSQEQLAQAAN*ATK.E               |
| N485  | Q96PD5  | R.GFGVAIVGN*YTAALPTEAALR.T                  |
| N77   | Q96PD5  | R.LYHFLLGAWSLN*ATELDPCPLSPELLGLTK.E         |
| N108  | P29622  | R.SQILEGLGFN*LTESESDVHR.G                   |
| N157  | P29622  | K.FLN*DTM#AVYEAK.L                          |
| N238  | P29622  | K.DFYVDEN*TTVR.V                            |
| N453  | P03952  | R.IYSGILN*LSDITK.D                          |
| N308  | P03952  | K.IYPGVDFGGEELN*VTFVK.G                     |
| N396  | P03952  | R.IVGGTN*SSWGEWPWQVSLQVK.L                  |
| N494  | P03952  | K.LQAPLN*YTEFQKPICLPSK.G                    |
| N211  | P04275  | R.ASPSSSCN*ISSGEM#QK.G                      |
| N2635 | P04275  | R.KTTCNPCPLGYKEEN*NTGECCGR.C                |
| N2223 | P04275  | R.HCDGN*VSSCGDHPSEGCFPPDK.V                 |
| N1515 | P04275  | K.IGEADFN*R.S                               |
| N666  | P04275  | K.GQVYLQCGTPCN*LTCR.S                       |
| N2357 | P04275  | R.GLQPTLTNPGECPN*FTCACR.K                   |
| N369  | P08185  | K.AVLQLNEEGVDTAGSTGVTLN*LTSKPIILR.F         |
| N96   | P08185  | R.AQLLQGLGFN*LTER.S                         |

| Site  | Protein | Modified Sequence                    |
|-------|---------|--------------------------------------|
| N369  | P08185  | K.AVLQLN*EEGVDTAGSTGVTLN*LTSKPIILR.F |
| N186  | P02750  | R.KLPPGLLAN*FTLLR.T                  |
| N325  | P02750  | K.M#FSQN*DTR.C                       |
| N325  | P02750  | K.MFSQN*DTR.C                        |
| N243  | P07358  | K.EYESYDFERN*VTEK.M                  |
| N119  | P43251  | K.DVQIIVFPEDGIHGFN*FTR.T             |
| N402  | P43251  | K.WNVNAPPTFHSEMMYDN*FTLVVPWGK.E      |
| N349  | P43251  | K.NPVGLIGAEN*ATGETDPSHSK.F           |
| N203  | P43251  | R.YQFNTNVVFSNN*GTLVDR.Y              |
| N170  | P01019  | R.LQAILGVPWKDKN*CTSR.L               |
| N47   | P01019  | R.VYIHPFHLVIHN*ESTCEQLAK.A           |
| N1075 | Q13201  | R.HPFTGDN*CTIK.L                     |
| N507  | Q13201  | R.SILYYESLN*K.T                      |
| N114  | Q13201  | K.LQN*LTLPTN*ASIK.F                  |
| N120  | Q13201  | K.LQN*LTLPTN*ASIK.F                  |
| N136  | Q13201  | K.FNPGAESVVLSN*STLK.F                |
| N90   | P01833  | R.ANLTN*FPEN*GTFVVN*IAQLSQDDSGR.Y    |
| N186  | P01833  | K.QIGLYPVLVIDSSGYVNPV*YTGR.I         |
| N421  | P01833  | R.LSLLEEPGN*GTFTVILNQLTSR.D          |
| N64   | P20851  | K.TLFCN*ASK.E                        |
| N98   | P20851  | R.LGHCPDPVLVNGEFSSSGPVN*VSDK.I       |
| N98   | P20851  | R.LGHCPDPVLVN*GEFSSSGPVN*VSDK.I      |
| N174  | P49908  | K.CGN*CSLTTLK.D                      |
| N174  | P49908  | K.CGN*CSLTTLKDEDFCKR.V               |
| N174  | P49908  | K.CGN*CSLTTLKDEDFCKR.R               |
| N83   | P49908  | K.EGYSN*ISYIVVN*HQGISSR.L            |
| N580  | Q06033  | R.KNAHGEEKEN*LTAR.A                  |
| N580  | Q06033  | K.NAHGEEKEN*LTAR.A                   |
| N580  | Q06033  | K.N*AHGEEKEN*LTAR.A                  |
| N165  | P05543  | K.TLYETEVFSTDFSN*ISAAK.Q             |
| N36   | P05543  | K.VTACHSSQPN*ATLYK.M                 |
| N135  | O95445  | K.TELFSSSCPGGIM#LN*ETGQGYQR.F        |
| N135  | O95445  | K.TELFSSSCPGGIMLN*ETGQGYQR.F         |
| N135  | O95445  | K.TELFSSSCPGGIMLN*ETGQ*GYQR.F        |
| N91   | Q9Y6R7  | K.VTVRPGESVMVN*ISAK.A                |
| N1743 | Q9Y6R7  | R.VVTVAALGTN*ISIHKDEIGK.V            |
| N5186 | Q9Y6R7  | R.YLPVN*SSLLTSDCSER.C                |
| N348  | P22792  | K.LYLGSNN*LTALHPALFQN*LSK.L          |
| N359  | P22792  | K.LYLGSNN*LTALHPALFQN*LSK.L          |
| N74   | P22792  | R.AFGSNPN*LTK.V                      |
| N398  | P55058  | R.IYSN*HSALESALAIPLQAPLK.T           |

| Site  | Protein | Modified Sequence                      |
|-------|---------|----------------------------------------|
| N143  | P55058  | K.VSN*VSCQASVSR.M                      |
| N64   | P55058  | K.EGHFYYN*ISEVK.V                      |
| N514  | P00736  | K.EHEAQSN*ASLDVFLGHTNVEELMK.L          |
| N221  | P00736  | R.CN*YSIR.V                            |
| N551  | Q08380  | K.AAIPSAALDTN*SSK.S                    |
| N398  | Q08380  | K.GLN*LTEDTYKPR.I                      |
| N192  | Q08380  | K.EPGSN*VTMSVDAECVPMVR.D               |
| N184  | P09172  | R.SLEAIN*GSGLQM#GLQR.V                 |
| N184  | P09172  | R.SLEAIN*GSGLQMGLQR.V                  |
| N184  | P09172  | R.SLEAIN*GSGLQ*MGLQR.V                 |
| N98   | P23142  | R.CATPHGDN*ASLEATFVK.R                 |
| N199  | P17936  | K.VDYESQSTDTQN*FSSESK.R                |
| N116  | P17936  | R.GLCVN*ASAVSR.L                       |
| N136  | P17936  | R.AYLLPAPPAPGN*ASESEEDR.S              |
| N285  | P36955  | K.VTQN*LTIEESLTSEFIHDIDR.E             |
| N126  | P03951  | K.GINYN*SSVAK.S                        |
| N491  | P03951  | K.LETTVN*YTDSQRPICLPSKGDR.N            |
| N491  | P03951  | K.LETTVN*YTDSQRPICLPSK.G               |
| N71   | P01591  | R.EN*ISDPTSPLR.T                       |
| N369  | P06276  | K.DN*NSIITR.K                          |
| N284  | P06276  | R.EN*ETEIK.C                           |
| N85   | P06276  | K.WSDIWN*ATK.Y                         |
| N37   | P07359  | R.N*LTALPPDLPK.D                       |
| N189  | O75636  | R.VELEDFNGN*R.T                        |
| N189  | O75636  | R.VELEDFN*GN*R.T                       |
| N821  | P12259  | K.NSVLN*SSTAIEHSSPYSEDPIEDPLQPDVTGIR.L |
| N162  | P05160  | R.KEHETCLAPELYN*GN*YSTTQK.T            |
| N162  | P05160  | R.KEHETCLAPELYN*GN*YSTTQ*K.T           |
| N356  | P13473  | R.VQPFN*VTQGK.Y                        |
| N257  | P13473  | K.VASVININPN*TTHSTGSCR.S               |
| N295  | Q9UK55  | K.LPYQGN*ATMLVVLMEK.M                  |
| N104  | P14151  | K.IGGIWTWVGTN*K.S                      |
| N60   | P14151  | R.FCRDN*YTDLVAIQNK.A                   |
| N396  | P04278  | R.SHEIWTHSCPQSPGN*GTDASH.-             |
| N380  | P04278  | R.LDVDQALN*R.S                         |
| N1511 | Q07954  | K.WTGHN*VTVVQR.T                       |
| N3333 | Q07954  | R.TCVSN*CTASQFVCK.N                    |
| N368  | P35858  | K.AGAFLGLTNVAVMN*LSGNCLR.N             |
| N659  | P80108  | K.LGTSLSGSHVLMN*GTLK.Q                 |
| N307  | P80108  | R.N*LTTSLETESVDR.N                     |
| N145  | Q8NI99  | R.VLN*ASAEAQR.A                        |

| Site   | Protein | Modified Sequence                               |
|--------|---------|-------------------------------------------------|
| N58    | Q8NI99  | R.ATPEAAN*ASELAALR.M                            |
| N599   | Q15063  | K.EVN*DTLLVNELK.S                               |
| N552   | Q76LX8  | R.CQVCGGDN*STCSPR.K                             |
| N707   | Q76LX8  | R.WVN*YSCLDQAR.K                                |
| N153   | P13598  | R.GN*ETLHYETFGK.A                               |
| N47    | P13598  | K.GSLEVN*CSTTCN*QPEVGGLETSLDK.I                 |
| N21953 | Q8WZ42  | K.GSDQWTHITTVKGLECVVRN*LTEGEEYTFQ*VMAVN*SAGR.S  |
| N92    | P0DP01  | R.N*TSISTAYMELSSLR.S                            |
| N136   | Q9UGM5  | R.VLYLAAYN*CTLRPVS.K                            |
| N275   | P07333  | K.VLTLN*LDQ*VDFQ*HAGN*YSCVASNVQGK.H             |
| N169   | Q14515  | R.N*YSHHQLNR.S                                  |
| N282   | P08571  | R.CMWSSALNSLN*LSFAGLEQVPK.G                     |
| N442   | P33151  | R.EVYPWYN*LTVEAK.E                              |
| N353   | O95497  | K.LTGVAGN*YTVCQK.D                              |
| N365   | P19320  | R.SEGTN*STLTLSPVSFEN*EHSYLCTVTCGHK.K            |
| N296   | P04180  | R.MAWPEDHVFISTPSFN*YTGR.D                       |
| N459   | P13591  | R.DGQLLPSSN*YSNIK.I                             |
| N433   | P00748  | R.N*HSCEPCQTLAVR.S                              |
| N63    | P55056  | K.ELLETVVN*R.T                                  |
| N182   | Q14126  | K.IN*ATDADEPNTLNSK.I                            |
| N102   | O75144  | R.LFN*VTPQDEQK.F                                |
| N88    | Q9NTU7  | R.STNHEPSEMSN*K.T                               |
| N136   | P54289  | K.DDLDPKKN*DSEPGSQ*R.I                          |
| N509   | P12821  | R.N*ETHFDAGAK.F                                 |
| N196   | Q9UHG3  | K.LLHALGGDDFLGMLN*R.T                           |
| N296   | Q9Y5C1  | R.IDGSQNFN*ETWENYK.Y                            |
| N108   | Q02985  | R.KFVQGN*STEVACHPGYGLPK.A                       |
| N78    | P41222  | K.SVVAPATDGGLN*LTSTFLR.K                        |
| N85    | P80188  | K.SYN*VTSVLFR.K                                 |
| N1178  | Q9NY15  | R.SLEAQGN*SSHLDADTVR.H                          |
| N1279  | P07942  | K.LSDTTSQSN*STAK.E                              |
| N411   | P16109  | R.AFQYDTN*CSFR.C                                |
| N248   | Q13508  | R.ITLIPLN*EVFQVSQEGAGNNLILQ*SIN*K.T             |
| N1027  | Q86VB7  | K.EDAAVN*CTDISVQK.T                             |
| N234   | P15144  | K.AEFN*ITLIHPK.D                                |
|        | Site    | Modified Sequence                               |
| N2239  | P04114  | K.TIHDLHLFIENIDFN*KSGSSTASWIQ*NVDTK.Y           |
| N2560  | P04114  | K.N*LTDFAEQYSIQDWAK.R                           |
| N3101  | P04114  | K.YNQN*FSAGN*NENIM#EAHVGINGEANLDFLNIPLTIPEM#R.L |
| N2779  | P04114  | K.IQSPLFTLDANADIGN*GTTSAN*EAGIAASITAK.G         |
| N3358  | P04114  | K.SSVITLNTNAELFN*QSDIVAHLLSSSSSSVIDALQYK.L      |

| Site  | Protein | Modified Sequence                               |
|-------|---------|-------------------------------------------------|
| N4237 | P04114  | K.VHN*GSEILFSYFQDLVITLPEL.R.K                   |
| N2779 | P04114  | K.IQSPLFTLDAN*ADIGN*GTTSAN*EAGIAASITAK.G        |
| N185  | P04114  | K.Q*VLFLDTVYGN*CSTHFTVK.T                       |
| N1523 | P04114  | R.FN*SSYLQGTNQTGR.Y                             |
| N1523 | P04114  | R.FN*SSYLQ*GTNQTGR.Y                            |
| N107  | P01009  | K.ADTHDEILEGLN*FN*LTEIPEAQIHEGFQ*ELLR.T         |
| N869  | P01023  | K.SLGN*VN*FTVSAEALQSQELCGTEVPSVPEHGR.K          |
| N396  | P01023  | R.GN*EANYYSN*ATTDEHGLVQ*FSINTTN*VMGTSLTVR.V     |
| N410  | P01023  | R.GN*EAN*YYSNATTDEHGLVQ*FSIN*TTN*VMGTSLTVR.V    |
| N410  | P01023  | R.GNEAN*YYSNATTDEHGLVQ*FSIN*TTN*VMGTSLTVR.V     |
| N396  | P01023  | R.GNEAN*YYSN*ATTDEHGLVQFSIN*TTN*VMGTSLTVR.V     |
| N410  | P01023  | R.GNEAN*YYSN*ATTDEHGLVQFSIN*TTN*VMGTSLTVR.V     |
| N396  | P01023  | R.GN*EANYYSN*ATTDEHGLVQ*FSIN*TTN*VMGTSLTVR.V    |
| N410  | P01023  | R.GN*EANYYSN*ATTDEHGLVQ*FSIN*TTN*VMGTSLTVR.V    |
| N410  | P01023  | R.GNEANYYSNATTDEHGLVQ*FSIN*TTN*VMGTSLTVR.V      |
| N410  | P01023  | R.GNEANYYSNATTDEHGLVQFSIN*TTN*VMGTSLTVR.V       |
| N1424 | P01023  | R.TEVSSN*HVLIIYLDKVSQ*Q*TLSLFFTVLQ*DVPVR.D      |
| N396  | P01023  | R.GN*EANYYSN*ATTDEHGLVQFSIN*TTN*VMGTSLTVR.V     |
| N410  | P01023  | R.GN*EANYYSN*ATTDEHGLVQFSIN*TTN*VMGTSLTVR.V     |
| N85   | P01024  | K.TVLTPATNHMGN*VTFTIPAN*R.E                     |
| N187  | P01008  | K.LVSANRLFGDKSLTFN*ETYQDISLVYGA.L               |
| N128  | P01008  | K.LGACN*DTLQ*Q*LMEVFKFDTISEK.T                  |
| N128  | P01008  | K.LGACN*DTLQQ*LMEVFK.F                          |
| N279  | P01871  | K.THTNISESHPN*ATFSAVGEASICEDDWNNGER.F           |
| N46   | P01871  | K.N*N*SDISSTR.G                                 |
| N209  | P01871  | R.GLTFQQ*N*ASSM#CVPDQ*DTAIR.V                   |
| N209  | P01871  | R.GLTFQQN*ASSM#CVPDQ*DTAIR.V                    |
| N802  | P08603  | R.WDPEVN*CSM#AQ*IQ*LCPPPPQIPNSHN*MTTTLN*YR.D    |
| N822  | P08603  | R.WDPEVN*CSM#AQ*IQ*LCPPPPQIPNSHN*MTTTLN*YR.D    |
| N802  | P08603  | R.WDPEVN*CSMAQIQLCPPPPQIPNSHN*M#TTTLN*YR.D      |
| N822  | P08603  | R.WDPEVN*CSMAQIQLCPPPPQIPNSHN*M#TTTLN*YR.D      |
| N822  | P08603  | R.WDPEVNCMAQIQLCPPPPQIPNSHN*MTTTLN*YR.D         |
| N1095 | P08603  | R.SPYEM#FGDEEVMCLNGN*WTEPPQCK.D                 |
| N802  | P08603  | R.WDPEVN*CSMAQ*IQ*LCPPPPQIPNSHN*MTTTLN*YR.D     |
| N822  | P08603  | R.WDPEVN*CSMAQ*IQ*LCPPPPQIPNSHN*MTTTLN*YR.D     |
| N802  | P08603  | R.WDPEVN*CSMAQIQLCPPPPQIPN*SHN*MTTTLN*YR.D      |
| N822  | P08603  | R.WDPEVN*CSMAQIQLCPPPPQIPN*SHN*MTTTLN*YR.D      |
| N529  | P08603  | K.LN*DTLDYECHDGYESN*TGSTTGSIVCGYN*GWSLDPICYER.E |
| N1095 | P08603  | R.SPYEMFGDEEVMCLN*GN*WTEPPQ*CK.D                |
| N1029 | P08603  | K.MDGASN*VTCINSR.W                              |
| N882  | P08603  | K.IPCSQPPQ*IEHGTIN*SSR.S                        |

| Site | Protein | Modified Sequence                             |
|------|---------|-----------------------------------------------|
| N882 | P08603  | K.IPCSQ*PPQ*IEHGTIN*SSR.S                     |
| N882 | P08603  | K.IPCSQ*PPQIEHGTIN*SSR.S                      |
| N184 | P00738  | K.MVSHHN*LTTGATLIN*EQ*WLLTTAK.N               |
| N271 | P01011  | K.YTGN*ASALFILPDQDK.M                         |
| N106 | P01011  | K.GLKFN*LTETSEAEIHQSFQHLLR.T                  |
| N127 | P01011  | R.TLN*QSSDELQLSMGN*AMFVK.E                    |
| N271 | P01011  | K.YTGN*ASALFILPDQDKMEEVEAMLLPETLK.R           |
| N186 | P01011  | K.KLINDYVKN*GTR.G                             |
| N81  | Q14624  | K.KAFITN*FSMIIDGMTYPGIIKEK.A                  |
| N517 | Q14624  | K.LPTQ*N*ITFQTESSVAEQAEFQ*SPK.Y               |
| N517 | Q14624  | K.LPTQ*N*ITFQTESSVAEQ*EAEFQSPK.Y              |
| N528 | P04003  | R.LSVDKDQYVEPENVTIQCDSGYGVVGPQ*SITCSGN*R.T    |
| N528 | P04003  | R.LSVDKDQYVEPENVTIQ*CDSGYGVVGPQ*SITCSGN*R.T   |
| N506 | P04003  | R.LSVDKDQ*YVEPEN*VTIQCDSGYGVVGPQSITCSGN*R.T   |
| N528 | P04003  | R.LSVDKDQ*YVEPEN*VTIQCDSGYGVVGPQSITCSGN*R.T   |
| N528 | P04003  | R.LSVDKDQ*YVEPENVTIQ*CDSGYGVVGPQSITCSGN*R.T   |
| N506 | P04003  | R.LSVDKDQYVEPEN*VTIQCDSGYGVVGPQ*SITCSGN*R.T   |
| N528 | P04003  | R.LSVDKDQYVEPEN*VTIQCDSGYGVVGPQ*SITCSGN*R.T   |
| N506 | P04003  | R.LSVDKDQ*YVEPEN*VTIQ*CDSGYGVVGPQ*SITCSGN*R.T |
| N528 | P04003  | R.LSVDKDQ*YVEPEN*VTIQ*CDSGYGVVGPQ*SITCSGN*R.T |
| N762 | P00450  | K.ELHHLQEQN*VSN*AFLDKGEFYIGSK.Y               |
| N358 | P00450  | K.AGLQAFFQ*VQECN*K.S                          |
| N138 | P00450  | K.EHEGAIYPDN*TTDFQ*R.A                        |
| N762 | P00450  | K.ELHHLQEQN*VSNAFLDK.G                        |
| N103 | P10909  | K.ELPGVCN*ETM#M#ALWEECKPCLK.Q                 |
| N291 | P10909  | R.HN*STGCLR.M                                 |
| N354 | P10909  | K.MLN*TSSLLEQLNEQFN*WVSR.L                    |
| N354 | P10909  | K.MLN*TSSLLEQ*LN*EQFNWVSR.L                   |
| N240 | P02790  | R.GHGHRN*GTGHGN*STHHGPEYM#R.C                 |
| N246 | P02790  | R.GHGHRN*GTGHGN*STHHGPEYM#R.C                 |
| N453 | P02790  | K.ALPQ*PQN*VTSLLGCTH.-                        |
| N240 | P02790  | R.GHGHRN*GTGHGN*STHHGPEYMR.C                  |
| N246 | P02790  | R.GHGHRN*GTGHGN*STHHGPEYMR.C                  |
| N64  | P02790  | R.CSDGWSFDATLDDN*GTM#LFFK.G                   |
| N253 | P02749  | K.LGN*WSAMPCK.A                               |
| N253 | P05155  | R.VLSN*N*SDANLELINTWVAK.N                     |
| N69  | P05155  | K.MLFVEPILEVSSLPTN*STTNSATK.I                 |
| N253 | P05155  | R.VLSN*NSDANLELIN*TWVAK.N                     |
| N156 | P02765  | R.KVCQ*DCPLLAPLN*DTR.V                        |
| N285 | P19827  | R.DKICDLLVANN*HFAHFFAPQN*LTNMNK.N             |
| N285 | P19827  | R.DKICDLLVANNHFAHFFAPQN*LTNMNK.N              |

| Site  | Protein | Modified Sequence                                    |
|-------|---------|------------------------------------------------------|
| N285  | P19827  | K.ICDLLVANNHFAHFFAPQ*N*LTNMNK.N                      |
| N588  | P19827  | R.AN*LSSQ*ALQ*M#SLDYGFVTPLTSM SIR.G                  |
| N428  | O75882  | R.VFHIHN*ESWVLLTPK.A                                 |
| N1198 | O75882  | R.DLDMFIN*ASK.N                                      |
| N1043 | O75882  | K.MPSQ*APTGNFYQPQLN*SSMCLEDSR.Y                      |
| N300  | O75882  | R.GICN*SSDVR.G                                       |
| N1073 | O75882  | K.CIN*QSICEK.C                                       |
| N416  | O75882  | K.IDSTGN*VTN*ELR.V                                   |
| N416  | O75882  | K.IDSTGN*VTNELR.V                                    |
| N49   | P05546  | K.GGETAQSADPQWEQLN*NKN*LSMPLLPADFHK.E                |
| N49   | P05546  | K.GGETAQ*SADPQWEQLNKN*LSMPLLPADFHK.E                 |
| N169  | P01042  | R.HGIQYFNN*NTQ*HSSLFMLNEVK.R                         |
| N252  | P51884  | R.LSHNELADSGIPGN*SFN*VSSLVELDLSYNK.L                 |
| N252  | P51884  | R.LSHN*ELADSGIPGN*SFN*VSSLVELDLSYNK.L                |
| N127  | P51884  | K.KLHINHN*N*LTESVGPLPK.S                             |
| N467  | P06681  | K.LTDTICGVGN*MSAN*ASDQ*ER.T                          |
| N471  | P06681  | K.LTDTICGVGN*MSAN*ASDQ*ER.T                          |
| N63   | P04196  | R.IADAHLDRVEN*TTVYYLVLDVQESDCSVLSR.K                 |
| N93   | P02763  | R.QDQCIYN*TTYLN*VQR.E                                |
| N86   | P04004  | K.N*N*ATVHEQVGGPSLTSDLQAQSK.G                        |
| N33   | P43652  | R.DIENFN*STQ*K.F                                     |
| N98   | P05090  | R.ADGTVN*QIEGEATPVN*LTEPAK.L                         |
| N143  | P00734  | R.YPHKPEIN*STTHPGADLQEN*FCR.N                        |
| N157  | P29622  | K.FLN*DTMAVYEAK.L                                    |
| N174  | P09871  | K.N*CGVN*CSGDVFTALIGEIASPN*YPKYPEN*SR.C              |
| N174  | P09871  | K.NCGVN*CSGDVFTALIGEIASPN*YPKYPENSRC                 |
| N324  | P27169  | K.VTQ*VYAEN*GTVLQGSTVASVYK.G                         |
| N367  | Q96PD5  | R.LEPVHLQLQCM#SQEQLAQVAAN*ATK.E                      |
| N367  | Q96PD5  | R.LEPVHLQLQCMSQEQ*LAQVAAN*ATK.E                      |
| N2635 | P04275  | K.TTCNPCPLGYKEEN*NTGECCGR.C                          |
| N174  | P49908  | K.KCGN*CSLTTLK.D                                     |
| N174  | P49908  | K.KCGN*CSLTTLKDEDFCK.R                               |
| N112  | P25311  | K.DIVEYYNDSN*GSHVLQGR.F                              |
| N79   | P02750  | R.SDHGSSISCQ*PPAEIPGYLPADTVHLAVEFFN*LTHLPANLLQGASK.L |
| N855  | P13671  | R.LSSN*STKK.E                                        |
| N580  | Q08380  | R.TVIRPFYLTN*SSGVD.-                                 |
| N69   | Q08380  | R.ALGFEN*ATQALGR.A                                   |
| N2138 | Q9Y6R7  | R.SVTLQIYN*HSLTLSAR.W                                |
| N1830 | Q9Y6R7  | R.NPNN*DQ*VFPN*GTLAPSIPIWGGSWR.A                     |
| N369  | P08185  | K.AVLQ*LN*EEGVDTAGSTGVTLN*LTSKPIILR.F                |
| N70   | P05156  | K.N*GTAVCATN*RR.S                                    |



| Site  | Protein | Modified Sequence                         |
|-------|---------|-------------------------------------------|
| N70   | P05156  | K.N*GTAVCATNR.R                           |
| N253  | P05543  | K.TTTVQVPMMHQ*MEQ*YYHLVDMELN*CTVLQMDYSK.N |
| N64   | P20851  | K.KTLFCN*ASK.E                            |
| N348  | P22792  | K.LYLGSNN*LTALHPALFQ*NLSK.L               |
| N162  | P05160  | K.EHETCLAPELYNGN*YSTTQK.T                 |
| N143  | P55058  | K.VSN*VSCQ*ASVSR.M                        |
| N83   | P01833  | R.AN*LTN*FPEN*GTFVFN*IAQ*LSQDDSGR.Y       |
| N90   | P01833  | R.AN*LTN*FPEN*GTFVFN*IAQ*LSQDDSGR.Y       |
| N186  | P01833  | K.Q*IGLYPVLVIDSSGYVNPV*YTGR.I             |
| N444  | Q16610  | K.HIPGLIHN*MTAR.C                         |
| N25   | Q9NZT1  | K.AFSAVDTDGN*GTINAQELGAALK.A              |
| N73   | Q96IY4  | K.KQVHFFVN*ASDVDNVK.A                     |
| N73   | Q96IY4  | K.QVHFFVN*ASDVDNVK.A                      |
| N686  | P02671  | R.MDGSLNFN*R.T                            |
| N101  | Q9BY67  | R.FQLLN*FSSSELK.V                         |
| N113  | Q9BY67  | K.VSLTN*VSISDEGR.Y                        |
| N638  | P55290  | K.IN*NTHALVSLQLNLK.A                      |
| N530  | P55290  | R.YSVYKDPAGWLNINPIN*GTVDTTAVLDR.E         |
| N462  | Q14126  | R.YVQN*GTYTEVK.I                          |
| N176  | P13598  | K.AAPAPQEATATFN*STADR.E                   |
| N379  | P40189  | K.SHLQN*YTVN*ATK.L                        |
| N383  | P40189  | K.SHLQN*YTVN*ATK.L                        |
| N131  | P40189  | K.N*LSCIVNEGK.K                           |
| N128  | P15144  | K.KLN*YTLSQGHR.V                          |
| N818  | P15144  | R.N*ATLVNEADK.L                           |
| N575  | O00391  | R.N*STLDPGKPEMMK.S                        |
| N94   | P80108  | K.FHDVSESTHWTPFLN*ASVHYIR.E               |
| N321  | P80108  | R.NIN*YTER.G                              |
| N385  | P48740  | R.NN*LTTYK.S                              |
| N178  | P48740  | R.FGYILHTDN*R.T                           |
| N816  | Q13201  | R.DEKLN*QSNFQK.M                          |
| N615  | P26927  | K.GTGN*DTVLNVALLNVISNQEENIK.H             |
| N296  | P26927  | R.GTAN*TTTAGVPCQR.W                       |
| N181  | P40197  | K.LLDLSGN*N*LTHLPK.G                      |
| N181  | P40197  | K.LLDLSGNN*LTHLPK.G                       |
| N180  | Q9UK55  | K.ETFFN*LSK.R                             |
| N57   | P16070  | K.AFN*STLPTMAQMEK.A                       |
| N457  | Q12860  | K.GTEWLVN*SSR.I                           |
| N474  | O15394  | R.YN*CTATNHIGTR.F                         |
| N1159 | Q92954  | R.N*GTLVAFR.G                             |
| N203  | Q92820  | K.N*FTMNEK.L                              |

| Site  | Protein | Modified Sequence                                     |
|-------|---------|-------------------------------------------------------|
| N62   | P11279  | K.N*MTFDLPSDATVVVLN*R.S                               |
| N76   | P11279  | K.N*MTFDLPSDATVVVLN*R.S                               |
| N145  | P05362  | R.AN*LTVVLLR.G                                        |
| N202  | Q15223  | R.NPN*GTVTVISR.Y                                      |
| N1107 | P11047  | R.VN*NTLSSQISR.L                                      |
| N378  | Q9NZK5  | R.NILDALMLN*TTR.I                                     |
| N257  | P11597  | K.N*VSEDLPLPTFSPTLLGDSR.M                             |
| N405  | Q9HBB8  | R.ITN*HSHFR.M                                         |
| N156  | P02788  | R.TAGWNVPIGTLRPFLN*WTGPPEPIEAAVAR.F                   |
| N931  | Q9Y4L1  | R.AEPLN*ASASDQGEK.V                                   |
| N241  | Q16620  | K.HMN*ETSHTQGSRL.I                                    |
| N1027 | Q86VB7  | R.WGHSECGHKEDA AVN*CTDISVQK.T                         |
| N435  | P11717  | R.MSVINFECN*K.T                                       |
| N413  | Q12913  | K.IHVAGETDSSNLN*VSEPR.A                               |
| N150  | O14786  | K.RGPECSQN*YTTPSGVIK.S                                |
| N151  | P08571  | R.N*VSWATGR.S                                         |
| N299  | Q01459  | K.QIN*SSISGNLWDKDQR.A                                 |
| N143  | Q86SQ4  | K.GFN*ASYIR.V                                         |
| N3358 | P04114  | K.SSVITLNTN*AELFN*Q*SDIVAHLLSSSSSVIDALQYK.L           |
| N1424 | P01023  | R.TEVSSNHVLIYLDKVS N*Q*TL SLFFT VLQ*DVPVR.D           |
| N630  | P02787  | R.QQQ*HLFGSN*VTDCSGN*FCLFR.S                          |
| N430  | P02751  | R.GGNSN*GALCHFPFLYNNHN*YTDCTSEGR.R                    |
| N186  | P01011  | K.LINDYVKN*GTR.G                                      |
| N345  | P04196  | R.HSHNNN*SSDLHPHK.H                                   |
| N65   | P05090  | R.CIQAN*YSLM#EN GK.I                                  |
| N252  | P51884  | R.LSHNELADSGIPGN*SFN*VSSLVELDLSYN*K.L                 |
| N160  | P51884  | K.LGSFEGLVN*LTFIHLQHN*R.L                             |
| N146  | P02745  | R.NPPMGGNVVIFDTVITNQ*EOPYQN*HSGR.F                    |
| N1043 | O75882  | K.M#PSQAPTGNFY PQ*PLL N*SSMCLEDSR.Y                   |
| N1054 | O75882  | R.YN*WSFIHCPACQCNGH SK.C                              |
| N83   | P49908  | K.KEGYSN*ISYIVVNHQGISSR.L                             |
| N857  | P04275  | K.WN*CTDHVCDATCSTIGMAHYLTFDGLK.Y                      |
| N211  | P04275  | R.ASPSSSCN*ISSGEMQK.G                                 |
| N125  | Q08380  | R.DAGVVCTN*ETR.S                                      |
| N406  | P09871  | R.YTCEEPYYMENG GGGGEYHCAGN*GSWVNEVLGPELPK.C           |
| N253  | P27169  | K.HAN*WTL TPLK.S                                      |
| N71   | P20851  | K.TLFCN*ASKEWDN*TTTECR.L                              |
| N127  | P03952  | R.GVNFN*VSK.V                                         |
| N126  | P08697  | R.AMMAFTADL FSLVAQTSTCPNLILSPLSVALALSHLALGAQN*HTLQR.L |
| N75   | Q9Y6R7  | R.LLISSLES PASVSILSQADN*TSKK.V                        |
| N2138 | Q9Y6R7  | R.SVTLQ*IYN*HSLTLSAR.W                                |

| Site  | Protein | Modified Sequence                  |
|-------|---------|------------------------------------|
| N135  | O95445  | K.TELFSSSCPGGIM#LN*ETGQ*GYQR.F     |
| N245  | P55058  | R.N*WSLPNR.A                       |
| N433  | P00748  | R.RN*HSCEPCQTLAVR.S                |
| N840  | Q13201  | R.KYQQN*MSHLEEK.L                  |
| N344  | Q13201  | K.KIDN*ISLTVNDVR.N                 |
| N186  | P02750  | K.LPPGLLAN*FTLLR.T                 |
| N368  | P35858  | K.AGAFGLGLTNVAVM#N*LSGNCLR.N       |
| N170  | P01019  | K.DKN*CTSR.L                       |
| N754  | P10643  | R.N*YTLTGR.D                       |
| N162  | P05160  | R.KEHETCLAPELYNGN*YSTTQK.T         |
| N509  | P06276  | K.YGNPN*ETQNN*STSWPVFK.S           |
| N514  | P06276  | K.YGNPN*ETQNN*STSWPVFK.S           |
| N90   | P01833  | R.ANLTN*FPEN*GTFVVNIAQLSQDDSGR.Y   |
| N499  | P01833  | K.WN*NTGCQALPSQDEGPSK.A            |
| N44   | P04180  | K.AELSN*HTRPVILVPGCLGNQLEAK.L      |
| N412  | Q14515  | K.KAEN*SSNEEETSSEGNMR.V            |
| N203  | P43251  | R.YQFN*TNVVFSSNN*GTLVDR.Y          |
| N184  | P09172  | R.SLEAIN*GSGLQ*M#GLQR.V            |
| N385  | P40197  | R.N*LSSLESVQLDHN*QLETLPGDVFGALPR.L |
| N78   | P02679  | K.VDKDLQSLEDILHQVEN*K.T            |
| N490  | Q6UY14  | R.LVSGN*LTDR.G                     |
| N1115 | Q7Z7M0  | R.GYQGDGISHCN*R.T                  |
| N403  | Q6UXB8  | K.SLPNFPN*TSATAN*ATGGR.A           |
| N409  | Q6UXB8  | K.SLPNFPN*TSATAN*ATGGR.A           |
| N263  | P07339  | K.GSLSYLN*VTR.K                    |
| N251  | P02786  | K.DFEDLYTPVN*GSIVIVR.A             |
| N53   | Q9Y5Y7  | K.ANQQLN*FTEAK.E                   |
| N2127 | Q07954  | K.DN*ATDSVPLR.T                    |
| N69   | Q53GD3  | R.N*STGAYCGMGEN*K.D                |
